# Supplementary material for: Two Loci, RiAF3 and RiAF4, Contribute to the Annual-Fruiting Trait in Rubus
Source: Front Plant Sci. 2019 Oct 25;10:1341. doi: 10.3389/fpls.2019.01341 (PMC6824294; doi:10.3389/fpls.2019.01341)
Supplement: Supplementary file 2 [file Table_2.xlsx]

## Sheet: Table S2
Table S2. Chi-Square test results performed on SNP markers heterozygous in NC493 (AF) and Chilliwack (BF) respectively. The markers are named according to their physical position in the R. occidentalis genome (ORUS 4115-3 v3.0, VanBuren et al. 2018). LOD=logarithm of the odds, AF=annual-fruiting, BF= biennial-fruiting.
Phenoptype	Chromosome	Physical position in the genome	LOD score	chisquare value	Phenotype	Chromosome	Physical position in the genome	LOD score	chisquare value
AF	chr4	4076592	4.32309	4.75e-05	BF	chr1	2705484	0	1
AF	chr4	3708767	4.26764	5.4e-05	BF	chr1	3179165	0	1
AF	chr4	22969223	4.26497	5.43e-05	BF	chr1	3501612	0	1
AF	chr4	5389296	4.22624	5.94e-05	BF	chr1	3501613	0	1
AF	chr4	5389315	4.22624	5.94e-05	BF	chr1	3802451	0	1
AF	chr3	41124650	4.20688	6.21e-05	BF	chr1	4542660	0	1
AF	chr3	41124653	4.20688	6.21e-05	BF	chr1	4818773	0	1
AF	chr3	42828190	4.15276	7.03e-05	BF	chr1	4893205	0	1
AF	chr4	4333515	4.14076	7.23e-05	BF	chr1	7266394	0	1
AF	chr4	3644891	4.13779	7.28e-05	BF	chr1	7266399	0	1
AF	chr3	38038058	4.11407	7.69e-05	BF	chr1	7266414	0	1
AF	chr3	42828192	4.11407	7.69e-05	BF	chr1	19381654	0	1
AF	chr3	41497384	4.09575	8.02e-05	BF	chr1	19794968	0	1
AF	chr4	5517904	4.0634	8.64e-05	BF	chr2	614363	0	1
AF	chr4	3335478	4.06043	8.7e-05	BF	chr2	9871618	0	1
AF	chr4	14899870	4.06043	8.7e-05	BF	chr2	13120513	0	1
AF	chr4	5389330	4.02537	9.43e-05	BF	chr2	17582230	0	1
AF	chr4	5436498	4.02537	9.43e-05	BF	chr2	19736926	0	1
AF	chr1	5888525	4.00846	9.81e-05	BF	chr2	28633047	0	1
AF	chr4	5436503	4.00605	9.86e-05	BF	chr2	31331909	0	1
AF	chr4	5903985	4.00605	9.86e-05	BF	chr2	31476063	0	1
AF	chr4	5903988	4.00605	9.86e-05	BF	chr2	33382922	0	1
AF	chr4	6081837	4.00605	9.86e-05	BF	chr2	33382923	0	1
AF	chr4	6219491	4.00605	9.86e-05	BF	chr2	33382939	0	1
AF	chr4	17455927	4.00605	9.86e-05	BF	chr2	33382949	0	1
AF	chr4	4406516	4.00511	9.88e-05	BF	chr2	36108678	0	1
AF	chr4	4740972	4.00511	9.88e-05	BF	chr2	36823947	0	1
AF	chr4	4741007	4.00511	9.88e-05	BF	chr2	38078422	0	1
AF	chr4	4135590	3.95784	0.000110194	BF	chr2	38514266	0	1
AF	chr4	4135662	3.95784	0.000110194	BF	chr2	38640542	0	1
AF	chr4	10335519	3.95185	0.000111726	BF	chr3	6342117	0	1
AF	chr4	4149038	3.94904	0.00011245	BF	chr3	6342132	0	1
AF	chr4	4784781	3.94117	0.000114506	BF	chr3	20471557	0	1
AF	chr4	5436494	3.92183	0.00011972	BF	chr3	24342298	0	1
AF	chr5	31282430	3.91308	0.000122157	BF	chr3	25943275	0	1
AF	chr1	17922991	3.91295	0.000122193	BF	chr3	26861962	0	1
AF	chr4	32187079	3.91295	0.000122193	BF	chr3	26861972	0	1
AF	chr3	27283775	3.91042	0.000122907	BF	chr3	29451545	0	1
AF	chr6	27288032	3.91042	0.000122907	BF	chr3	31232696	0	1
AF	chr4	5347077	3.86692	0.000135858	BF	chr3	31554856	0	1
AF	chr4	6552940	3.86676	0.000135908	BF	chr3	33340749	0	1
AF	chr4	5233485	3.86673	0.000135916	BF	chr3	33340767	0	1
AF	chr4	1949536	3.86658	0.000135961	BF	chr3	33340805	0	1
AF	chr4	2355990	3.86658	0.000135961	BF	chr3	35510049	0	1
AF	chr4	4916534	3.86395	0.000136788	BF	chr3	35844921	0	1
AF	chr6	9076235	3.86393	0.000136796	BF	chr3	37029530	0	1
AF	chr4	4274809	3.82534	0.000149507	BF	chr3	37911267	0	1
AF	chr4	4274825	3.82534	0.000149507	BF	chr3	40691032	0	1
AF	chr4	6081779	3.82534	0.000149507	BF	chr3	43618611	0	1
AF	chr4	15613398	3.80888	0.000155281	BF	chr4	64186	0	1
AF	chr1	16635214	3.80846	0.000155431	BF	chr4	1630323	0	1
AF	chr3	39522612	3.80846	0.000155431	BF	chr4	3466069	0	1
AF	chr5	4870598	3.80836	0.000155469	BF	chr4	3581494	0	1
AF	chr5	4870630	3.80836	0.000155469	BF	chr4	3696227	0	1
AF	chr5	4870640	3.80836	0.000155469	BF	chr4	3696229	0	1
AF	chr4	6074471	3.80828	0.000155495	BF	chr4	3696235	0	1
AF	chr6	40341524	3.80682	0.000156018	BF	chr4	4694873	0	1
AF	chr4	4582479	3.80605	0.000156296	BF	chr4	5042274	0	1
AF	chr5	211145	3.80605	0.000156296	BF	chr4	5190291	0	1
AF	chr4	9905803	3.77798	0.000166731	BF	chr4	5896906	0	1
AF	chr3	24002758	3.77004	0.000169807	BF	chr4	6429283	0	1
AF	chr3	24002770	3.77004	0.000169807	BF	chr4	16150367	0	1
AF	chr5	1258079	3.77004	0.000169807	BF	chr4	17341847	0	1
AF	chr5	1706991	3.76972	0.000169934	BF	chr4	17341849	0	1
AF	chr3	33585308	3.76752	0.000170798	BF	chr4	18018717	0	1
AF	chr3	35530208	3.76752	0.000170798	BF	chr4	18076685	0	1
AF	chr4	6363194	3.76752	0.000170798	BF	chr4	18418503	0	1
AF	chr4	6363204	3.76752	0.000170798	BF	chr4	24925304	0	1
AF	chr4	10116660	3.76752	0.000170798	BF	chr4	27208915	0	1
AF	chr5	2288250	3.76752	0.000170798	BF	chr4	27765507	0	1
AF	chr5	2288269	3.76752	0.000170798	BF	chr4	35122470	0	1
AF	chr4	3668238	3.75065	0.000177562	BF	chr5	4728260	0	1
AF	chr4	15613401	3.75065	0.000177562	BF	chr5	6609390	0	1
AF	chr3	24002794	3.75054	0.000177606	BF	chr5	9068953	0	1
AF	chr3	24002797	3.75054	0.000177606	BF	chr5	11556971	0	1
AF	chr3	35470194	3.74824	0.00017855	BF	chr5	12209965	0	1
AF	chr3	38067050	3.74824	0.00017855	BF	chr5	13813725	0	1
AF	chr4	3496000	3.7456	0.000179637	BF	chr5	28944080	0	1
AF	chr4	3496058	3.7456	0.000179637	BF	chr5	33017355	0	1
AF	chr6	27390628	3.68822	0.00020501	BF	chr5	34142845	0	1
AF	chr4	4740943	3.66854	0.000214514	BF	chr5	34142848	0	1
AF	chr3	39522641	3.66738	0.000215092	BF	chr5	35560951	0	1
AF	chr2	39484146	3.63187	0.000233417	BF	chr5	35817221	0	1
AF	chr3	39522626	3.62874	0.000235104	BF	chr5	37076324	0	1
AF	chr4	28017158	3.62852	0.000235225	BF	chr5	38211200	0	1
AF	chr4	32194828	3.62852	0.000235225	BF	chr5	40619994	0	1
AF	chr3	21062098	3.62773	0.000235652	BF	chr6	1673799	0	1
AF	chr3	36571990	3.62622	0.000236474	BF	chr6	1673840	0	1
AF	chr6	26731506	3.62622	0.000236474	BF	chr6	1691012	0	1
AF	chr4	3663752	3.62097	0.00023935	BF	chr6	1901089	0	1
AF	chr4	3593895	3.61508	0.000242615	BF	chr6	1901128	0	1
AF	chr2	31016835	3.61079	0.000245024	BF	chr6	1901135	0	1
AF	chr3	2460009	3.61079	0.000245024	BF	chr6	6990323	0	1
AF	chr3	34046415	3.61079	0.000245024	BF	chr6	8727991	0	1
AF	chr3	34046475	3.61079	0.000245024	BF	chr6	8728004	0	1
AF	chr3	34508313	3.61079	0.000245024	BF	chr6	15414340	0	1
AF	chr4	32706200	3.61079	0.000245024	BF	chr6	31842032	0	1
AF	chr4	1967466	3.60927	0.000245884	BF	chr6	33625138	0	1
AF	chr2	13128621	3.60697	0.000247189	BF	chr6	34226013	0	1
AF	chr3	35138229	3.60697	0.000247189	BF	chr6	47038154	0	1
AF	chr3	36571978	3.60697	0.000247189	BF	chr7	635549	0	1
AF	chr4	4857740	3.60697	0.000247189	BF	chr7	4489790	0	1
AF	chr4	9119508	3.60697	0.000247189	BF	chr7	16257403	0	1
AF	chr4	2930613	3.60429	0.00024872	BF	chr7	25233078	0	1
AF	chr4	22838209	3.60423	0.000248752	BF	chr7	31159996	0	1
AF	chr5	5931659	3.57451	0.000266373	BF	chr7	37322247	0	1
AF	chr5	5931669	3.57451	0.000266373	BF	chr7	37322265	0	1
AF	chr5	14797442	3.57451	0.000266373	BF	chr7	37701105	0	1
AF	chr7	716761	3.57451	0.000266373	BF	chr7	37721575	0	1
AF	chr7	716762	3.57451	0.000266373	BF	chr7	37964627	0	1
AF	chr4	11692282	3.5729	0.000267365	BF	chr7	38583108	0	1
AF	chr3	40184135	3.57231	0.000267725	BF	chr7	39104458	0	1
AF	chr4	6274324	3.57231	0.000267725	BF	chr7	39164092	0	1
AF	chr4	14100622	3.57231	0.000267725	BF	chr7	39355325	0	1
AF	chr4	14963988	3.57231	0.000267725	BF	chr7	39512134	0	1
AF	chr5	15943989	3.57231	0.000267725	BF	chr7	39526984	0	1
AF	chr3	36065812	3.55548	0.000278304	BF	chr7	40640081	0	1
AF	chr3	41520596	3.55548	0.000278304	BF	chr7	40952912	0	1
AF	chr4	10642024	3.55548	0.000278304	BF	chr1	1520532	0.000470873	0.998916
AF	chr3	37663492	3.55537	0.000278372	BF	chr1	2039612	0.000470873	0.998916
AF	chr4	6355203	3.55432	0.000279052	BF	chr1	2039627	0.000470873	0.998916
AF	chr1	24325975	3.55308	0.000279849	BF	chr1	2456329	0.000470873	0.998916
AF	chr3	34997108	3.55308	0.000279849	BF	chr1	2456369	0.000470873	0.998916
AF	chr4	5200950	3.55308	0.000279849	BF	chr1	2705319	0.000470873	0.998916
AF	chr4	5200959	3.55308	0.000279849	BF	chr1	3560398	0.000470873	0.998916
AF	chr4	13792731	3.54658	0.000284066	BF	chr1	3691855	0.000470873	0.998916
AF	chr4	2087540	3.5411	0.000287676	BF	chr1	3944715	0.000470873	0.998916
AF	chr4	2722081	3.52461	0.000298809	BF	chr1	3952858	0.000470873	0.998916
AF	chr4	2722100	3.52461	0.000298809	BF	chr1	4421031	0.000470873	0.998916
AF	chr4	3261644	3.52461	0.000298809	BF	chr1	4973433	0.000470873	0.998916
AF	chr7	38974489	3.51669	0.000304307	BF	chr1	7780174	0.000470873	0.998916
AF	chr4	1021231	3.51501	0.000305485	BF	chr2	853376	0.000470873	0.998916
AF	chr4	1021271	3.51501	0.000305485	BF	chr2	1284762	0.000470873	0.998916
AF	chr4	1021272	3.51501	0.000305485	BF	chr2	1469042	0.000470873	0.998916
AF	chr6	27153428	3.50799	0.000310467	BF	chr2	1879617	0.000470873	0.998916
AF	chr2	4653032	3.50534	0.000312366	BF	chr2	1959870	0.000470873	0.998916
AF	chr3	27283756	3.50534	0.000312366	BF	chr2	5241111	0.000470873	0.998916
AF	chr2	4653058	3.50282	0.000314183	BF	chr2	6105379	0.000470873	0.998916
AF	chr4	3844176	3.49016	0.000323474	BF	chr2	6475128	0.000470873	0.998916
AF	chr4	4187504	3.49016	0.000323474	BF	chr2	7348563	0.000470873	0.998916
AF	chr4	4187505	3.49016	0.000323474	BF	chr2	9872055	0.000470873	0.998916
AF	chr4	7400782	3.48852	0.000324699	BF	chr2	10754429	0.000470873	0.998916
AF	chr4	7400790	3.48852	0.000324699	BF	chr2	16749650	0.000470873	0.998916
AF	chr4	4246137	3.48612	0.000326499	BF	chr2	17122281	0.000470873	0.998916
AF	chr6	24786143	3.48612	0.000326499	BF	chr2	31993951	0.000470873	0.998916
AF	chr4	13158961	3.47679	0.000333587	BF	chr2	36503590	0.000470873	0.998916
AF	chr4	13158986	3.47679	0.000333587	BF	chr2	36877023	0.000470873	0.998916
AF	chr2	12546192	3.4764	0.000333887	BF	chr2	38227151	0.000470873	0.998916
AF	chr4	3353561	3.4764	0.000333887	BF	chr3	7795375	0.000470873	0.998916
AF	chr5	18042640	3.4764	0.000333887	BF	chr3	10732205	0.000470873	0.998916
AF	chr4	6084388	3.4693	0.000339391	BF	chr3	11926964	0.000470873	0.998916
AF	chr7	9115202	3.46871	0.000339856	BF	chr3	12011680	0.000470873	0.998916
AF	chr1	16738410	3.46651	0.000341579	BF	chr3	14304657	0.000470873	0.998916
AF	chr7	6139592	3.46651	0.000341579	BF	chr3	18105540	0.000470873	0.998916
AF	chr3	30968460	3.45849	0.000347941	BF	chr3	30437244	0.000470873	0.998916
AF	chr3	30968462	3.45849	0.000347941	BF	chr3	30808069	0.000470873	0.998916
AF	chr4	4333576	3.45849	0.000347941	BF	chr3	33458081	0.000470873	0.998916
AF	chr4	3684966	3.45467	0.000351018	BF	chr3	33458112	0.000470873	0.998916
AF	chr4	3696155	3.44758	0.000356794	BF	chr3	38706635	0.000470873	0.998916
AF	chr4	3997708	3.44758	0.000356794	BF	chr3	39514031	0.000470873	0.998916
AF	chr4	7701695	3.44479	0.000359094	BF	chr4	1786993	0.000470873	0.998916
AF	chr4	7701696	3.44479	0.000359094	BF	chr4	2986187	0.000470873	0.998916
AF	chr4	5904017	3.43039	0.000371204	BF	chr4	3029491	0.000470873	0.998916
AF	chr6	1596966	3.43029	0.000371287	BF	chr4	3116235	0.000470873	0.998916
AF	chr4	5149300	3.42853	0.000372793	BF	chr4	3312724	0.000470873	0.998916
AF	chr3	42328972	3.42809	0.000373169	BF	chr4	3517390	0.000470873	0.998916
AF	chr4	6761888	3.42809	0.000373169	BF	chr4	3692610	0.000470873	0.998916
AF	chr4	22838265	3.42183	0.000378589	BF	chr4	3892987	0.000470873	0.998916
AF	chr4	11843671	3.4216	0.00037879	BF	chr4	4445067	0.000470873	0.998916
AF	chr4	3663792	3.42149	0.00037889	BF	chr4	4495225	0.000470873	0.998916
AF	chr1	5322356	3.41932	0.000380786	BF	chr4	4754172	0.000470873	0.998916
AF	chr5	6868743	3.41932	0.000380786	BF	chr4	4797685	0.000470873	0.998916
AF	chr4	3011300	3.41878	0.00038126	BF	chr4	5047890	0.000470873	0.998916
AF	chr5	1872198	3.41878	0.00038126	BF	chr4	5072924	0.000470873	0.998916
AF	chr5	7341133	3.41878	0.00038126	BF	chr4	5189373	0.000470873	0.998916
AF	chr5	7341134	3.41878	0.00038126	BF	chr4	5444988	0.000470873	0.998916
AF	chr4	7009258	3.41827	0.000381705	BF	chr4	5908934	0.000470873	0.998916
AF	chr1	25832532	3.41667	0.000383113	BF	chr4	6429318	0.000470873	0.998916
AF	chr1	25832552	3.41667	0.000383113	BF	chr4	6429323	0.000470873	0.998916
AF	chr3	2459956	3.41667	0.000383113	BF	chr4	6485906	0.000470873	0.998916
AF	chr3	35372671	3.41667	0.000383113	BF	chr4	6485919	0.000470873	0.998916
AF	chr4	11950030	3.41667	0.000383113	BF	chr4	6487751	0.000470873	0.998916
AF	chr4	14652340	3.41667	0.000383113	BF	chr4	6925589	0.000470873	0.998916
AF	chr5	1494291	3.41667	0.000383113	BF	chr4	6925617	0.000470873	0.998916
AF	chr4	10937462	3.41141	0.000387784	BF	chr4	7549079	0.000470873	0.998916
AF	chr2	13128624	3.40889	0.000390037	BF	chr4	16743864	0.000470873	0.998916
AF	chr5	1777187	3.40889	0.000390037	BF	chr4	26124585	0.000470873	0.998916
AF	chr5	1777189	3.40889	0.000390037	BF	chr4	33012926	0.000470873	0.998916
AF	chr5	3853272	3.40889	0.000390037	BF	chr4	35662699	0.000470873	0.998916
AF	chr5	5403389	3.40889	0.000390037	BF	chr5	7899175	0.000470873	0.998916
AF	chr7	39176730	3.40292	0.000395441	BF	chr5	13812220	0.000470873	0.998916
AF	chr4	15821066	3.38939	0.000407955	BF	chr5	20545656	0.000470873	0.998916
AF	chr4	15821067	3.38939	0.000407955	BF	chr5	38974126	0.000470873	0.998916
AF	chr1	25805227	3.3893	0.000408039	BF	chr5	38974129	0.000470873	0.998916
AF	chr1	25805232	3.3893	0.000408039	BF	chr5	40595790	0.000470873	0.998916
AF	chr5	2136755	3.3893	0.000408039	BF	chr6	117122	0.000470873	0.998916
AF	chr6	27909827	3.3893	0.000408039	BF	chr6	219852	0.000470873	0.998916
AF	chr2	14384871	3.38719	0.000410022	BF	chr6	219898	0.000470873	0.998916
AF	chr3	30960629	3.38719	0.000410022	BF	chr6	1066376	0.000470873	0.998916
AF	chr3	39541450	3.38719	0.000410022	BF	chr6	1892116	0.000470873	0.998916
AF	chr4	7939937	3.38719	0.000410022	BF	chr6	2045921	0.000470873	0.998916
AF	chr4	7939974	3.38719	0.000410022	BF	chr6	2045922	0.000470873	0.998916
AF	chr6	36769777	3.38719	0.000410022	BF	chr6	31839723	0.000470873	0.998916
AF	chr4	1871176	3.3808	0.000416104	BF	chr6	32141683	0.000470873	0.998916
AF	chr4	1871228	3.3808	0.000416104	BF	chr6	32314807	0.000470873	0.998916
AF	chr4	10794869	3.38057	0.000416318	BF	chr6	32320831	0.000470873	0.998916
AF	chr4	35042225	3.38057	0.000416318	BF	chr6	32390330	0.000470873	0.998916
AF	chr7	28083269	3.38057	0.000416318	BF	chr6	32390438	0.000470873	0.998916
AF	chr3	26866804	3.37828	0.000418522	BF	chr6	32390456	0.000470873	0.998916
AF	chr3	42495597	3.37828	0.000418522	BF	chr6	32390474	0.000470873	0.998916
AF	chr3	43293970	3.37828	0.000418522	BF	chr6	33595282	0.000470873	0.998916
AF	chr3	43293973	3.37828	0.000418522	BF	chr7	14197684	0.000470873	0.998916
AF	chr3	43293979	3.37828	0.000418522	BF	chr7	16901832	0.000470873	0.998916
AF	chr3	43294082	3.37828	0.000418522	BF	chr7	26871530	0.000470873	0.998916
AF	chr4	10008284	3.37828	0.000418522	BF	chr7	33247801	0.000470873	0.998916
AF	chr4	11950058	3.37828	0.000418522	BF	chr7	35455427	0.000470873	0.998916
AF	chr5	211194	3.37828	0.000418522	BF	chr7	37379894	0.000470873	0.998916
AF	chr6	26415668	3.37828	0.000418522	BF	chr7	37379897	0.000470873	0.998916
AF	chr4	224397	3.37501	0.000421686	BF	chr7	38622114	0.000470873	0.998916
AF	chr4	224412	3.37501	0.000421686	BF	chr7	39011488	0.000470873	0.998916
AF	chr4	215405	3.36149	0.000435019	BF	chr7	39165715	0.000470873	0.998916
AF	chr4	3015719	3.36139	0.000435125	BF	chr7	39590033	0.000470873	0.998916
AF	chr3	13844505	3.35909	0.000437427	BF	chr7	40470257	0.000470873	0.998916
AF	chr3	36299585	3.35909	0.000437427	BF	chr7	40806842	0.000470873	0.998916
AF	chr3	38550447	3.35909	0.000437427	BF	chr7	40806852	0.000470873	0.998916
AF	chr4	10008269	3.35909	0.000437427	BF	chr7	40860590	0.000470873	0.998916
AF	chr4	14160721	3.35909	0.000437427	BF	chr7	41126634	0.000470873	0.998916
AF	chr5	1548830	3.35909	0.000437427	BF	chr1	1015097	0.000509374	0.998828
AF	chr6	24593530	3.35909	0.000437427	BF	chr2	675327	0.000509374	0.998828
AF	chr6	24593577	3.35909	0.000437427	BF	chr2	1657660	0.000509374	0.998828
AF	chr4	22969245	3.35801	0.00043852	BF	chr2	8757912	0.000509374	0.998828
AF	chr4	4367913	3.35575	0.000440808	BF	chr2	8757916	0.000509374	0.998828
AF	chr4	4090278	3.35283	0.000443785	BF	chr2	9874345	0.000509374	0.998828
AF	chr3	24002747	3.35133	0.000445316	BF	chr3	4972244	0.000509374	0.998828
AF	chr4	4406545	3.35133	0.000445316	BF	chr3	26936978	0.000509374	0.998828
AF	chr3	43538281	3.34882	0.000447903	BF	chr3	29572318	0.000509374	0.998828
AF	chr4	4111752	3.34882	0.000447903	BF	chr3	30168993	0.000509374	0.998828
AF	chr4	5754150	3.34882	0.000447903	BF	chr3	30829534	0.000509374	0.998828
AF	chr4	6209426	3.34882	0.000447903	BF	chr3	30945028	0.000509374	0.998828
AF	chr4	6344512	3.34882	0.000447903	BF	chr3	31207368	0.000509374	0.998828
AF	chr4	6447603	3.3357	0.000461635	BF	chr3	33539419	0.000509374	0.998828
AF	chr4	4076388	3.33552	0.000461825	BF	chr3	34520599	0.000509374	0.998828
AF	chr4	7368494	3.33203	0.000465551	BF	chr3	36760538	0.000509374	0.998828
AF	chr3	35470213	3.32964	0.000468128	BF	chr3	38822548	0.000509374	0.998828
AF	chr4	6205156	3.32964	0.000468128	BF	chr4	1834199	0.000509374	0.998828
AF	chr4	6205168	3.32964	0.000468128	BF	chr4	27308356	0.000509374	0.998828
AF	chr4	17686052	3.32964	0.000468128	BF	chr4	34418274	0.000509374	0.998828
AF	chr3	33262855	3.3269	0.00047109	BF	chr5	9428900	0.000509374	0.998828
AF	chr3	43501371	3.3269	0.00047109	BF	chr5	12927981	0.000509374	0.998828
AF	chr7	13997374	3.3269	0.00047109	BF	chr5	12928101	0.000509374	0.998828
AF	chr4	8595831	3.30669	0.000493523	BF	chr5	34198131	0.000509374	0.998828
AF	chr5	460338	3.30669	0.000493523	BF	chr7	37646033	0.000509374	0.998828
AF	chr5	460369	3.30669	0.000493523	BF	chr7	37938752	0.000509374	0.998828
AF	chr1	18892205	3.30405	0.000496535	BF	chr7	39166970	0.000509374	0.998828
AF	chr3	38038109	3.30405	0.000496535	BF	chr7	39560475	0.000509374	0.998828
AF	chr3	40301980	3.30405	0.000496535	BF	chr1	7517394	0.000553424	0.998727
AF	chr4	7036642	3.30405	0.000496535	BF	chr2	14421756	0.000553424	0.998727
AF	chr6	14550926	3.30405	0.000496535	BF	chr3	7035250	0.000553424	0.998727
AF	chr3	23427698	3.3006	0.000500496	BF	chr3	28422694	0.000553424	0.998727
AF	chr6	29823448	3.28728	0.000516087	BF	chr3	37827632	0.000553424	0.998727
AF	chr7	14239076	3.28728	0.000516087	BF	chr3	40477824	0.000553424	0.998727
AF	chr3	37753077	3.28488	0.000518943	BF	chr4	3517345	0.000553424	0.998727
AF	chr3	37753087	3.28488	0.000518943	BF	chr5	11724521	0.000553424	0.998727
AF	chr4	1238811	3.28131	0.00052323	BF	chr5	27885625	0.000553424	0.998727
AF	chr4	13858716	3.27554	0.00053023	BF	chr5	35817211	0.000553424	0.998727
AF	chr3	24441916	3.27158	0.000535087	BF	chr7	40391546	0.000553424	0.998727
AF	chr5	30564049	3.26938	0.000537794	BF	chr7	40991098	0.000553424	0.998727
AF	chr6	9076244	3.26938	0.000537794	BF	chr2	10275196	0.000604212	0.99861
AF	chr2	15942851	3.26627	0.00054166	BF	chr2	28596052	0.000604212	0.99861
AF	chr2	15942853	3.26627	0.00054166	BF	chr3	1401069	0.000604212	0.99861
AF	chr2	15942854	3.26627	0.00054166	BF	chr3	1401077	0.000604212	0.99861
AF	chr4	3417234	3.25868	0.000551211	BF	chr3	30918387	0.000604212	0.99861
AF	chr4	10056404	3.2559	0.000554755	BF	chr3	30918390	0.000604212	0.99861
AF	chr4	33928275	3.2559	0.000554755	BF	chr3	30918432	0.000604212	0.99861
AF	chr5	1057371	3.2559	0.000554755	BF	chr7	32424672	0.000604212	0.99861
AF	chr5	1057434	3.2559	0.000554755	BF	chr2	11422442	0.000663274	0.998474
AF	chr5	14004769	3.2559	0.000554755	BF	chr2	11422464	0.000663274	0.998474
AF	chr4	7903657	3.24073	0.000574476	BF	chr2	20786370	0.000663274	0.998474
AF	chr4	13663889	3.23336	0.000584311	BF	chr3	22368766	0.000663274	0.998474
AF	chr4	9968491	3.23326	0.000584442	BF	chr4	17460188	0.000663274	0.998474
AF	chr5	6631771	3.23326	0.000584442	BF	chr7	30189775	0.000663274	0.998474
AF	chr5	37500660	3.23326	0.000584442	BF	chr7	37423588	0.000663274	0.998474
AF	chr3	42271857	3.23107	0.000587397	BF	chr7	39156109	0.000663274	0.998474
AF	chr3	33721434	3.22602	0.000594263	BF	chr1	959444	0.000732629	0.998314
AF	chr3	39171723	3.22602	0.000594263	BF	chr1	8660808	0.000732629	0.998314
AF	chr7	30106210	3.22602	0.000594263	BF	chr3	4353539	0.000732629	0.998314
AF	chr4	4173847	3.22383	0.000597268	BF	chr3	25748709	0.000732629	0.998314
AF	chr4	14652338	3.22383	0.000597268	BF	chr3	38083121	0.000732629	0.998314
AF	chr4	19208451	3.22383	0.000597268	BF	chr4	4111791	0.000732629	0.998314
AF	chr4	23002972	3.22383	0.000597268	BF	chr5	4661271	0.000732629	0.998314
AF	chr5	2775191	3.22383	0.000597268	BF	chr5	6888163	0.000732629	0.998314
AF	chr5	3700194	3.22383	0.000597268	BF	chr5	6888185	0.000732629	0.998314
AF	chr6	30638411	3.22383	0.000597268	BF	chr7	1499233	0.000732629	0.998314
AF	chr4	15965959	3.21431	0.000610504	BF	chr7	36399796	0.000732629	0.998314
AF	chr3	43252578	3.21192	0.000613878	BF	chr1	29939248	0.000814975	0.998125
AF	chr4	31380015	3.21192	0.000613878	BF	chr1	29939270	0.000814975	0.998125
AF	chr5	13054729	3.21192	0.000613878	BF	chr1	29939271	0.000814975	0.998125
AF	chr5	15325371	3.21192	0.000613878	BF	chr3	32066098	0.000814975	0.998125
AF	chr4	4309586	3.2103	0.00061617	BF	chr3	38083115	0.000814975	0.998125
AF	chr4	4980981	3.20122	0.000629182	BF	chr4	27125367	0.000814975	0.998125
AF	chr1	25805234	3.20054	0.000630169	BF	chr4	33133227	0.000814975	0.998125
AF	chr5	2595192	3.20054	0.000630169	BF	chr6	6990295	0.000814975	0.998125
AF	chr7	3858223	3.20054	0.000630169	BF	chr7	635489	0.000814975	0.998125
AF	chr5	7679901	3.19938	0.000631857	BF	chr7	1090565	0.000814975	0.998125
AF	chr1	11768592	3.19844	0.000633224	BF	chr7	24352677	0.000814975	0.998125
AF	chr3	31102131	3.19844	0.000633224	BF	chr4	28364634	0.000913996	0.997898
AF	chr3	38035627	3.19844	0.000633224	BF	chr5	10631234	0.000913996	0.997898
AF	chr3	38035629	3.19844	0.000633224	BF	chr6	7103070	0.000913996	0.997898
AF	chr3	43044027	3.19844	0.000633224	BF	chr6	19794219	0.000913996	0.997898
AF	chr4	16197753	3.19844	0.000633224	BF	chr6	22210924	0.000913996	0.997898
AF	chr6	36769720	3.19844	0.000633224	BF	chr6	46967114	0.000913996	0.997898
AF	chr6	36769721	3.19844	0.000633224	BF	chr7	41150927	0.000913996	0.997898
AF	chr4	12970485	3.18967	0.000646142	BF	chr5	31548936	0.00103483	0.99762
AF	chr4	7532603	3.18818	0.00064837	BF	chr5	31750181	0.00103483	0.99762
AF	chr6	24621474	3.18805	0.000648562	BF	chr5	8809320	0.00118487	0.997275
AF	chr4	7368075	3.18783	0.000648896	BF	chr5	8809322	0.00118487	0.997275
AF	chr4	8020525	3.18783	0.000648896	BF	chr2	5605285	0.00137503	0.996839
AF	chr5	36635689	3.18783	0.000648896	BF	chr1	874113	0.00355951	0.991837
AF	chr4	2969941	3.18773	0.000649041	BF	chr1	874132	0.00355951	0.991837
AF	chr6	29117868	3.18773	0.000649041	BF	chr1	1380680	0.00355951	0.991837
AF	chr2	3808519	3.18554	0.000652321	BF	chr1	1420733	0.00355951	0.991837
AF	chr3	34446313	3.18554	0.000652321	BF	chr1	1963175	0.00355951	0.991837
AF	chr3	34446318	3.18554	0.000652321	BF	chr1	2062576	0.00355951	0.991837
AF	chr3	34446331	3.18554	0.000652321	BF	chr1	2632188	0.00355951	0.991837
AF	chr3	34446336	3.18554	0.000652321	BF	chr1	3751889	0.00355951	0.991837
AF	chr3	34446340	3.18554	0.000652321	BF	chr1	3873607	0.00355951	0.991837
AF	chr3	36979188	3.18554	0.000652321	BF	chr1	3952940	0.00355951	0.991837
AF	chr3	38038036	3.18554	0.000652321	BF	chr1	4014362	0.00355951	0.991837
AF	chr3	38038083	3.18554	0.000652321	BF	chr1	4059651	0.00355951	0.991837
AF	chr4	7321709	3.18554	0.000652321	BF	chr1	4142298	0.00355951	0.991837
AF	chr4	9457501	3.18554	0.000652321	BF	chr1	4146209	0.00355951	0.991837
AF	chr4	11950048	3.18554	0.000652321	BF	chr1	4451854	0.00355951	0.991837
AF	chr4	11950049	3.18554	0.000652321	BF	chr1	4477071	0.00355951	0.991837
AF	chr5	2888792	3.18554	0.000652321	BF	chr1	4561509	0.00355951	0.991837
AF	chr5	17823322	3.18554	0.000652321	BF	chr1	5349906	0.00355951	0.991837
AF	chr5	17823349	3.18554	0.000652321	BF	chr1	26163473	0.00355951	0.991837
AF	chr6	25025296	3.18554	0.000652321	BF	chr1	30036977	0.00355951	0.991837
AF	chr6	25025321	3.18554	0.000652321	BF	chr1	30037347	0.00355951	0.991837
AF	chr7	8444738	3.18554	0.000652321	BF	chr1	30037355	0.00355951	0.991837
AF	chr4	3479476	3.16927	0.000677213	BF	chr2	1216878	0.00355951	0.991837
AF	chr1	11630562	3.16879	0.000677965	BF	chr2	1270941	0.00355951	0.991837
AF	chr4	13299544	3.16879	0.000677965	BF	chr2	1649684	0.00355951	0.991837
AF	chr4	4135660	3.16707	0.000680658	BF	chr2	2303375	0.00355951	0.991837
AF	chr3	27924616	3.1664	0.00068171	BF	chr2	2566696	0.00355951	0.991837
AF	chr3	40944589	3.1664	0.00068171	BF	chr2	2600597	0.00355951	0.991837
AF	chr4	4333743	3.1664	0.00068171	BF	chr2	9035824	0.00355951	0.991837
AF	chr4	13205749	3.1664	0.00068171	BF	chr2	10063921	0.00355951	0.991837
AF	chr4	14160705	3.1664	0.00068171	BF	chr2	10063922	0.00355951	0.991837
AF	chr4	7561086	3.16245	0.000687939	BF	chr2	12111881	0.00355951	0.991837
AF	chr4	10701666	3.16245	0.000687939	BF	chr2	17945778	0.00355951	0.991837
AF	chr3	24002822	3.16235	0.000688093	BF	chr2	20777498	0.00355951	0.991837
AF	chr5	3817807	3.16235	0.000688093	BF	chr2	20812038	0.00355951	0.991837
AF	chr4	3513256	3.16037	0.000691242	BF	chr2	28633109	0.00355951	0.991837
AF	chr4	3820197	3.16037	0.000691242	BF	chr2	31331858	0.00355951	0.991837
AF	chr3	34446623	3.16016	0.000691569	BF	chr2	31331860	0.00355951	0.991837
AF	chr3	41543184	3.16016	0.000691569	BF	chr2	31331881	0.00355951	0.991837
AF	chr3	43501382	3.16016	0.000691569	BF	chr2	31331891	0.00355951	0.991837
AF	chr4	6845934	3.16016	0.000691569	BF	chr2	33749234	0.00355951	0.991837
AF	chr4	16286848	3.16016	0.000691569	BF	chr2	36772263	0.00355951	0.991837
AF	chr5	4780073	3.16016	0.000691569	BF	chr3	6014443	0.00355951	0.991837
AF	chr6	28081202	3.16016	0.000691569	BF	chr3	9650654	0.00355951	0.991837
AF	chr6	28081238	3.16016	0.000691569	BF	chr3	12352418	0.00355951	0.991837
AF	chr4	5194022	3.15003	0.0007079	BF	chr3	13329521	0.00355951	0.991837
AF	chr4	3011879	3.14795	0.000711292	BF	chr3	22094547	0.00355951	0.991837
AF	chr4	3011880	3.14795	0.000711292	BF	chr3	24035212	0.00355951	0.991837
AF	chr4	4112495	3.14501	0.00071612	BF	chr3	25894783	0.00355951	0.991837
AF	chr4	5037591	3.14501	0.00071612	BF	chr3	26546660	0.00355951	0.991837
AF	chr4	10018782	3.14501	0.00071612	BF	chr3	35521423	0.00355951	0.991837
AF	chr4	10018793	3.14501	0.00071612	BF	chr3	35825184	0.00355951	0.991837
AF	chr4	9116565	3.14475	0.000716556	BF	chr3	36574115	0.00355951	0.991837
AF	chr4	5178868	3.14354	0.000718553	BF	chr3	37737902	0.00355951	0.991837
AF	chr4	215443	3.14342	0.000718746	BF	chr3	37737911	0.00355951	0.991837
AF	chr3	32696715	3.14332	0.000718922	BF	chr3	37737912	0.00355951	0.991837
AF	chr5	306717	3.14197	0.000721156	BF	chr3	37737915	0.00355951	0.991837
AF	chr3	35219228	3.14103	0.000722715	BF	chr3	37911281	0.00355951	0.991837
AF	chr3	39236626	3.14103	0.000722715	BF	chr3	42439876	0.00355951	0.991837
AF	chr3	40642986	3.14103	0.000722715	BF	chr4	1938458	0.00355951	0.991837
AF	chr3	42223045	3.14103	0.000722715	BF	chr4	2381643	0.00355951	0.991837
AF	chr1	24622825	3.13359	0.000735205	BF	chr4	3112120	0.00355951	0.991837
AF	chr4	4503175	3.13313	0.000735993	BF	chr4	3112137	0.00355951	0.991837
AF	chr3	23857204	3.13081	0.000739923	BF	chr4	3314760	0.00355951	0.991837
AF	chr4	4078451	3.12866	0.000743606	BF	chr4	3333517	0.00355951	0.991837
AF	chr4	4346186	3.12866	0.000743606	BF	chr4	3333536	0.00355951	0.991837
AF	chr4	4166201	3.12022	0.000758194	BF	chr4	3513222	0.00355951	0.991837
AF	chr4	4933903	3.11361	0.000769823	BF	chr4	3764230	0.00355951	0.991837
AF	chr4	4933948	3.11361	0.000769823	BF	chr4	3764266	0.00355951	0.991837
AF	chr7	15818953	3.11361	0.000769823	BF	chr4	3880942	0.00355951	0.991837
AF	chr4	381283	3.111	0.000774453	BF	chr4	4253033	0.00355951	0.991837
AF	chr2	22818499	3.10914	0.000777785	BF	chr4	4326843	0.00355951	0.991837
AF	chr4	4082155	3.10914	0.000777785	BF	chr4	4326863	0.00355951	0.991837
AF	chr4	4916581	3.10914	0.000777785	BF	chr4	4689549	0.00355951	0.991837
AF	chr5	1981040	3.10914	0.000777785	BF	chr4	5088189	0.00355951	0.991837
AF	chr5	3558381	3.10914	0.000777785	BF	chr4	5201995	0.00355951	0.991837
AF	chr5	3558382	3.10914	0.000777785	BF	chr4	5342159	0.00355951	0.991837
AF	chr4	3495234	3.10623	0.000783015	BF	chr4	5351541	0.00355951	0.991837
AF	chr5	7771197	3.10623	0.000783015	BF	chr4	5872860	0.00355951	0.991837
AF	chr4	3885880	3.09402	0.000805341	BF	chr4	6177242	0.00355951	0.991837
AF	chr1	13668692	3.08971	0.000813383	BF	chr4	6605541	0.00355951	0.991837
AF	chr3	43501355	3.08971	0.000813383	BF	chr4	6948451	0.00355951	0.991837
AF	chr5	8689734	3.08971	0.000813383	BF	chr4	6960814	0.00355951	0.991837
AF	chr5	39792930	3.08971	0.000813383	BF	chr4	7540606	0.00355951	0.991837
AF	chr4	35023629	3.087	0.00081847	BF	chr4	13858524	0.00355951	0.991837
AF	chr5	27664078	3.08461	0.000822985	BF	chr4	16816422	0.00355951	0.991837
AF	chr4	2332359	3.07916	0.000833366	BF	chr4	17480964	0.00355951	0.991837
AF	chr3	23446742	3.07623	0.000839017	BF	chr4	18076668	0.00355951	0.991837
AF	chr7	34143424	3.07565	0.000840146	BF	chr4	18076672	0.00355951	0.991837
AF	chr5	3700161	3.07449	0.000842392	BF	chr4	18076677	0.00355951	0.991837
AF	chr5	6841592	3.07449	0.000842392	BF	chr4	26307223	0.00355951	0.991837
AF	chr4	4889139	3.07147	0.000848257	BF	chr5	6231989	0.00355951	0.991837
AF	chr2	37589498	3.07063	0.000849896	BF	chr5	9449945	0.00355951	0.991837
AF	chr3	31996328	3.07055	0.000850057	BF	chr5	11374421	0.00355951	0.991837
AF	chr3	31996403	3.07055	0.000850057	BF	chr5	21629044	0.00355951	0.991837
AF	chr3	32280047	3.07055	0.000850057	BF	chr5	40045722	0.00355951	0.991837
AF	chr5	5214058	3.07055	0.000850057	BF	chr6	185300	0.00355951	0.991837
AF	chr5	10912917	3.07055	0.000850057	BF	chr6	954600	0.00355951	0.991837
AF	chr2	32574935	3.06854	0.000854008	BF	chr6	954604	0.00355951	0.991837
AF	chr3	39438414	3.06854	0.000854008	BF	chr6	1688067	0.00355951	0.991837
AF	chr3	40123961	3.06854	0.000854008	BF	chr6	1892068	0.00355951	0.991837
AF	chr3	40123983	3.06854	0.000854008	BF	chr6	1901254	0.00355951	0.991837
AF	chr4	15613505	3.06854	0.000854008	BF	chr6	2029251	0.00355951	0.991837
AF	chr4	15613511	3.06854	0.000854008	BF	chr6	7758409	0.00355951	0.991837
AF	chr4	15613561	3.06854	0.000854008	BF	chr6	28526458	0.00355951	0.991837
AF	chr4	25970810	3.06854	0.000854008	BF	chr6	32375551	0.00355951	0.991837
AF	chr6	24502724	3.06854	0.000854008	BF	chr6	33725761	0.00355951	0.991837
AF	chr6	25233151	3.06854	0.000854008	BF	chr7	23681598	0.00355951	0.991837
AF	chr7	620330	3.06433	0.000862328	BF	chr7	34950305	0.00355951	0.991837
AF	chr5	4780055	3.06231	0.000866336	BF	chr7	34950325	0.00355951	0.991837
AF	chr4	5734426	3.05566	0.000879703	BF	chr7	34950326	0.00355951	0.991837
AF	chr4	5149311	3.05235	0.000886438	BF	chr7	36525385	0.00355951	0.991837
AF	chr4	3527022	3.04089	0.000910142	BF	chr7	36552486	0.00355951	0.991837
AF	chr4	3527055	3.04089	0.000910142	BF	chr7	36552492	0.00355951	0.991837
AF	chr4	3805889	3.04089	0.000910142	BF	chr7	36849684	0.00355951	0.991837
AF	chr4	3805929	3.04089	0.000910142	BF	chr7	37684624	0.00355951	0.991837
AF	chr4	3925385	3.04089	0.000910142	BF	chr7	37732583	0.00355951	0.991837
AF	chr4	3925448	3.04089	0.000910142	BF	chr7	37732608	0.00355951	0.991837
AF	chr4	4310557	3.04089	0.000910142	BF	chr7	38113933	0.00355951	0.991837
AF	chr4	4310563	3.04089	0.000910142	BF	chr7	38830864	0.00355951	0.991837
AF	chr4	4355318	3.04089	0.000910142	BF	chr7	40323767	0.00355951	0.991837
AF	chr1	16547067	3.03776	0.000916736	BF	chr7	40539821	0.00355951	0.991837
AF	chr1	17923005	3.03776	0.000916736	BF	chr7	40607963	0.00355951	0.991837
AF	chr1	24622790	3.03776	0.000916736	BF	chr1	913947	0.00383939	0.991198
AF	chr3	24246735	3.03753	0.000917206	BF	chr1	2456302	0.00383939	0.991198
AF	chr4	34608592	3.03753	0.000917206	BF	chr2	646143	0.00383939	0.991198
AF	chr4	34608647	3.03753	0.000917206	BF	chr2	2048201	0.00383939	0.991198
AF	chr4	34608648	3.03753	0.000917206	BF	chr2	2099971	0.00383939	0.991198
AF	chr7	5992771	3.03753	0.000917206	BF	chr2	2363399	0.00383939	0.991198
AF	chr3	1942184	3.03525	0.000922037	BF	chr2	2363400	0.00383939	0.991198
AF	chr4	6592718	3.03525	0.000922037	BF	chr2	16434633	0.00383939	0.991198
AF	chr4	6592725	3.03525	0.000922037	BF	chr2	28568509	0.00383939	0.991198
AF	chr4	6592732	3.03525	0.000922037	BF	chr2	31129709	0.00383939	0.991198
AF	chr4	7036581	3.03525	0.000922037	BF	chr3	11646408	0.00383939	0.991198
AF	chr5	4950771	3.03525	0.000922037	BF	chr3	11646410	0.00383939	0.991198
AF	chr6	27288010	3.03525	0.000922037	BF	chr3	12347271	0.00383939	0.991198
AF	chr7	30805521	3.03525	0.000922037	BF	chr3	21814165	0.00383939	0.991198
AF	chr5	12177217	3.03502	0.000922531	BF	chr3	26034414	0.00383939	0.991198
AF	chr3	29552400	3.03448	0.000923672	BF	chr3	31996391	0.00383939	0.991198
AF	chr4	8193637	3.03239	0.000928139	BF	chr3	32430632	0.00383939	0.991198
AF	chr4	19208449	3.03239	0.000928139	BF	chr3	33112910	0.00383939	0.991198
AF	chr5	2647260	3.03239	0.000928139	BF	chr3	33614980	0.00383939	0.991198
AF	chr5	2775170	3.03239	0.000928139	BF	chr3	35510224	0.00383939	0.991198
AF	chr7	40834470	3.0285	0.000936475	BF	chr3	37262000	0.00383939	0.991198
AF	chr4	5783028	3.01866	0.000957945	BF	chr4	185978	0.00383939	0.991198
AF	chr5	2877493	3.01854	0.000958202	BF	chr4	1630123	0.00383939	0.991198
AF	chr1	11588366	3.01844	0.000958436	BF	chr4	3158673	0.00383939	0.991198
AF	chr4	9905844	3.01844	0.000958436	BF	chr4	5217960	0.00383939	0.991198
AF	chr4	9905854	3.01844	0.000958436	BF	chr4	6225408	0.00383939	0.991198
AF	chr4	9905862	3.01844	0.000958436	BF	chr4	15821206	0.00383939	0.991198
AF	chr7	40986173	3.01844	0.000958436	BF	chr4	16680411	0.00383939	0.991198
AF	chr1	13668642	3.01616	0.000963483	BF	chr4	22848306	0.00383939	0.991198
AF	chr3	6377132	3.01616	0.000963483	BF	chr4	24037950	0.00383939	0.991198
AF	chr6	9476106	3.01616	0.000963483	BF	chr4	24857252	0.00383939	0.991198
AF	chr1	12717639	3.01547	0.000965002	BF	chr4	24857299	0.00383939	0.991198
AF	chr3	43633213	3.01547	0.000965002	BF	chr4	25709819	0.00383939	0.991198
AF	chr4	381254	3.01529	0.000965397	BF	chr5	3312645	0.00383939	0.991198
AF	chr4	381294	3.01529	0.000965397	BF	chr5	3330716	0.00383939	0.991198
AF	chr4	6503409	3.01529	0.000965397	BF	chr5	3330737	0.00383939	0.991198
AF	chr4	9308736	3.01401	0.000968251	BF	chr5	5667847	0.00383939	0.991198
AF	chr4	11842531	3.01401	0.000968251	BF	chr5	6654481	0.00383939	0.991198
AF	chr4	11842533	3.01401	0.000968251	BF	chr5	9976139	0.00383939	0.991198
AF	chr4	2094676	3.01387	0.000968568	BF	chr5	11262602	0.00383939	0.991198
AF	chr4	2835070	3.01387	0.000968568	BF	chr5	13732965	0.00383939	0.991198
AF	chr4	7217024	3.01342	0.000969568	BF	chr5	13732983	0.00383939	0.991198
AF	chr4	7217073	3.01342	0.000969568	BF	chr5	16659672	0.00383939	0.991198
AF	chr5	246190	3.01342	0.000969568	BF	chr5	21001279	0.00383939	0.991198
AF	chr5	6888270	3.01333	0.000969767	BF	chr5	32372952	0.00383939	0.991198
AF	chr7	33428108	3.01333	0.000969767	BF	chr5	36907756	0.00383939	0.991198
AF	chr3	35356201	3.01124	0.000974454	BF	chr5	39429758	0.00383939	0.991198
AF	chr4	3027827	3.01124	0.000974454	BF	chr6	1308536	0.00383939	0.991198
AF	chr4	5037538	3.01124	0.000974454	BF	chr6	32681802	0.00383939	0.991198
AF	chr4	5043613	3.01124	0.000974454	BF	chr7	12905202	0.00383939	0.991198
AF	chr4	7908681	3.01124	0.000974454	BF	chr7	16902059	0.00383939	0.991198
AF	chr4	11641676	3.01124	0.000974454	BF	chr7	22925799	0.00383939	0.991198
AF	chr4	21779255	3.01124	0.000974454	BF	chr7	22925832	0.00383939	0.991198
AF	chr5	1057412	3.01124	0.000974454	BF	chr7	33043439	0.00383939	0.991198
AF	chr5	5337088	3.01124	0.000974454	BF	chr7	34989428	0.00383939	0.991198
AF	chr4	8193569	3.0072	0.000983552	BF	chr7	35005783	0.00383939	0.991198
AF	chr4	11502337	3.0072	0.000983552	BF	chr7	35005784	0.00383939	0.991198
AF	chr5	2323711	3.00711	0.000983754	BF	chr7	35302734	0.00383939	0.991198
AF	chr5	6250514	3.00261	0.000994019	BF	chr7	37147123	0.00383939	0.991198
AF	chr4	5805415	2.99683	0.00100732	BF	chr7	37323058	0.00383939	0.991198
AF	chr4	2817341	2.99671	0.00100761	BF	chr7	37423514	0.00383939	0.991198
AF	chr7	40974404	2.99671	0.00100761	BF	chr7	38646432	0.00383939	0.991198
AF	chr4	10800131	2.99648	0.00100813	BF	chr7	39067867	0.00383939	0.991198
AF	chr6	27909609	2.99639	0.00100836	BF	chr7	39166958	0.00383939	0.991198
AF	chr7	35617386	2.99639	0.00100836	BF	chr7	39605640	0.00383939	0.991198
AF	chr2	34738122	2.9942	0.00101344	BF	chr7	40330602	0.00383939	0.991198
AF	chr3	26745849	2.9942	0.00101344	BF	chr7	40543888	0.00383939	0.991198
AF	chr3	42636820	2.9942	0.00101344	BF	chr7	40728395	0.00383939	0.991198
AF	chr3	42636824	2.9942	0.00101344	BF	chr7	41062398	0.00383939	0.991198
AF	chr3	42636831	2.9942	0.00101344	BF	chr1	4667006	0.00415802	0.990471
AF	chr3	42636835	2.9942	0.00101344	BF	chr1	4865704	0.00415802	0.990471
AF	chr4	3407361	2.9942	0.00101344	BF	chr1	7250644	0.00415802	0.990471
AF	chr4	25545440	2.9942	0.00101344	BF	chr2	13093616	0.00415802	0.990471
AF	chr4	6336355	2.99003	0.00102322	BF	chr3	22456667	0.00415802	0.990471
AF	chr4	7433349	2.99003	0.00102322	BF	chr3	27097440	0.00415802	0.990471
AF	chr4	2566547	2.9898	0.00102376	BF	chr3	34051448	0.00415802	0.990471
AF	chr4	2788168	2.9898	0.00102376	BF	chr3	41070710	0.00415802	0.990471
AF	chr4	3335644	2.9898	0.00102376	BF	chr5	25612213	0.00415802	0.990471
AF	chr4	3708918	2.98649	0.00103159	BF	chr5	34303135	0.00415802	0.990471
AF	chr4	4367772	2.98649	0.00103159	BF	chr5	37076274	0.00415802	0.990471
AF	chr3	42091468	2.9775	0.00105316	BF	chr6	28502914	0.00415802	0.990471
AF	chr5	6944403	2.9774	0.00105342	BF	chr1	4518015	0.00452333	0.989639
AF	chr4	3881671	2.9757	0.00105756	BF	chr2	9952895	0.00452333	0.989639
AF	chr4	5038108	2.9757	0.00105756	BF	chr2	28198607	0.00452333	0.989639
AF	chr5	1130966	2.97525	0.00105865	BF	chr3	9029936	0.00452333	0.989639
AF	chr5	5821953	2.97525	0.00105865	BF	chr3	32460154	0.00452333	0.989639
AF	chr1	11768618	2.97307	0.00106398	BF	chr4	3986999	0.00452333	0.989639
AF	chr2	8080345	2.97307	0.00106398	BF	chr7	40486629	0.00452333	0.989639
AF	chr3	37157226	2.97307	0.00106398	BF	chr1	11136655	0.00494551	0.988677
AF	chr3	39258971	2.97307	0.00106398	BF	chr2	12462476	0.00494551	0.988677
AF	chr4	4135696	2.97307	0.00106398	BF	chr2	32214424	0.00494551	0.988677
AF	chr4	14100630	2.97307	0.00106398	BF	chr3	10718206	0.00494551	0.988677
AF	chr4	26735772	2.97307	0.00106398	BF	chr4	3506587	0.00494551	0.988677
AF	chr5	1618657	2.97307	0.00106398	BF	chr4	15273258	0.00494551	0.988677
AF	chr5	4175607	2.97307	0.00106398	BF	chr4	28959317	0.00494551	0.988677
AF	chr5	4175612	2.97307	0.00106398	BF	chr1	959474	0.00543778	0.987557
AF	chr5	4175628	2.97307	0.00106398	BF	chr1	959486	0.00543778	0.987557
AF	chr6	29319648	2.97307	0.00106398	BF	chr3	5653483	0.00543778	0.987557
AF	chr7	3441899	2.97307	0.00106398	BF	chr3	27988956	0.00543778	0.987557
AF	chr7	3441950	2.97307	0.00106398	BF	chr4	5104616	0.00543778	0.987557
AF	chr5	11604504	2.96935	0.00107312	BF	chr5	2261387	0.00543778	0.987557
AF	chr2	18769571	2.96365	0.0010873	BF	chr5	32040014	0.00543778	0.987557
AF	chr4	5083642	2.96001	0.00109645	BF	chr5	32040028	0.00543778	0.987557
AF	chr4	5083668	2.96001	0.00109645	BF	chr2	12799914	0.00601762	0.986239
AF	chr4	5726504	2.96001	0.00109645	BF	chr4	29679987	0.00601762	0.986239
AF	chr4	5726541	2.96001	0.00109645	BF	chr7	30912936	0.00601762	0.986239
AF	chr4	7433318	2.96001	0.00109645	BF	chr2	35162624	0.00670852	0.984672
AF	chr2	11380675	2.9591	0.00109875	BF	chr2	35162636	0.00670852	0.984672
AF	chr2	11380681	2.9591	0.00109875	BF	chr2	35162637	0.00670852	0.984672
AF	chr3	41034104	2.9591	0.00109875	BF	chr3	38083116	0.00670852	0.984672
AF	chr4	7908683	2.9591	0.00109875	BF	chr5	18747269	0.00670852	0.984672
AF	chr5	3080235	2.9591	0.00109875	BF	chr6	38206884	0.00670852	0.984672
AF	chr5	3852949	2.9591	0.00109875	BF	chr6	42020424	0.00670852	0.984672
AF	chr5	5858904	2.9591	0.00109875	BF	chr2	30891239	0.00754277	0.982782
AF	chr6	27554469	2.9591	0.00109875	BF	chr4	32316310	0.00754277	0.982782
AF	chr7	35724433	2.9591	0.00109875	BF	chr6	37109433	0.00754277	0.982782
AF	chr4	7964996	2.95892	0.00109922	BF	chr3	7035267	0.00856583	0.98047
AF	chr3	25943175	2.95784	0.00110194	BF	chr5	8809298	0.00856583	0.98047
AF	chr2	20980028	2.9569	0.00110432	BF	chr5	30736747	0.00856583	0.98047
AF	chr2	20980030	2.9569	0.00110432	BF	chr6	1068368	0.00856583	0.98047
AF	chr3	37918905	2.9569	0.00110432	BF	chr3	10806975	0.00984356	0.977589
AF	chr3	37918915	2.9569	0.00110432	BF	chr3	43476686	0.00984356	0.977589
AF	chr3	38468532	2.9569	0.00110432	BF	chr5	3111728	0.00984356	0.977589
AF	chr3	43112984	2.9569	0.00110432	BF	chr2	9953000	0.0114747	0.973925
AF	chr4	3011832	2.9569	0.00110432	BF	chr3	37175101	0.0114747	0.973925
AF	chr4	7832438	2.9569	0.00110432	BF	chr5	16308038	0.0114747	0.973925
AF	chr4	7832440	2.9569	0.00110432	BF	chr1	1520490	0.0121213	0.972476
AF	chr4	8507715	2.9569	0.00110432	BF	chr1	1944886	0.0121213	0.972476
AF	chr1	15494640	2.95637	0.00110567	BF	chr1	3244337	0.0121213	0.972476
AF	chr3	41520552	2.95637	0.00110567	BF	chr1	3276028	0.0121213	0.972476
AF	chr4	2742543	2.95637	0.00110567	BF	chr1	3276038	0.0121213	0.972476
AF	chr5	594566	2.95637	0.00110567	BF	chr1	3276052	0.0121213	0.972476
AF	chr7	3442430	2.95637	0.00110567	BF	chr1	3276061	0.0121213	0.972476
AF	chr3	34359908	2.95627	0.00110594	BF	chr1	3276063	0.0121213	0.972476
AF	chr5	8828996	2.95627	0.00110594	BF	chr1	3276070	0.0121213	0.972476
AF	chr3	40217437	2.95399	0.00111176	BF	chr1	3952767	0.0121213	0.972476
AF	chr3	40217450	2.95399	0.00111176	BF	chr1	4041076	0.0121213	0.972476
AF	chr3	40217470	2.95399	0.00111176	BF	chr1	4137989	0.0121213	0.972476
AF	chr4	4857771	2.95399	0.00111176	BF	chr1	4186873	0.0121213	0.972476
AF	chr4	17158226	2.95399	0.00111176	BF	chr1	4284221	0.0121213	0.972476
AF	chr4	5805432	2.94645	0.00113122	BF	chr1	4443138	0.0121213	0.972476
AF	chr1	13194162	2.94522	0.00113443	BF	chr1	4471823	0.0121213	0.972476
AF	chr3	5597405	2.94259	0.00114131	BF	chr1	4508703	0.0121213	0.972476
AF	chr5	14404194	2.94259	0.00114131	BF	chr1	4554719	0.0121213	0.972476
AF	chr5	14404221	2.94259	0.00114131	BF	chr1	4598824	0.0121213	0.972476
AF	chr5	14404242	2.94259	0.00114131	BF	chr1	4634159	0.0121213	0.972476
AF	chr4	4503209	2.94178	0.00114346	BF	chr1	6309208	0.0121213	0.972476
AF	chr4	4333648	2.94128	0.00114479	BF	chr1	8884894	0.0121213	0.972476
AF	chr4	2243472	2.9386	0.00115187	BF	chr1	9282970	0.0121213	0.972476
AF	chr4	3506152	2.93768	0.0011543	BF	chr1	9282973	0.0121213	0.972476
AF	chr1	16607753	2.93191	0.00116974	BF	chr2	777533	0.0121213	0.972476
AF	chr4	4582213	2.92652	0.00118436	BF	chr2	1060646	0.0121213	0.972476
AF	chr3	40188177	2.90696	0.0012389	BF	chr2	1304894	0.0121213	0.972476
AF	chr4	9844386	2.90255	0.00125156	BF	chr2	1437232	0.0121213	0.972476
AF	chr3	29253255	2.90171	0.00125397	BF	chr2	1528482	0.0121213	0.972476
AF	chr6	4784914	2.90171	0.00125397	BF	chr2	1559361	0.0121213	0.972476
AF	chr6	4784917	2.90171	0.00125397	BF	chr2	1943489	0.0121213	0.972476
AF	chr6	4784926	2.90171	0.00125397	BF	chr2	1970432	0.0121213	0.972476
AF	chr3	39187394	2.89962	0.00126002	BF	chr2	2032636	0.0121213	0.972476
AF	chr6	11264042	2.89962	0.00126002	BF	chr2	2170812	0.0121213	0.972476
AF	chr6	24885212	2.89962	0.00126002	BF	chr2	6105365	0.0121213	0.972476
AF	chr6	21999427	2.88791	0.00129447	BF	chr2	7455216	0.0121213	0.972476
AF	chr6	25033168	2.88541	0.00130194	BF	chr2	17096450	0.0121213	0.972476
AF	chr7	33895911	2.88541	0.00130194	BF	chr2	18268223	0.0121213	0.972476
AF	chr4	5803977	2.88494	0.00130336	BF	chr2	18268243	0.0121213	0.972476
AF	chr4	5803978	2.88494	0.00130336	BF	chr2	21596699	0.0121213	0.972476
AF	chr6	32171217	2.88494	0.00130336	BF	chr2	21596710	0.0121213	0.972476
AF	chr3	42586909	2.88485	0.0013036	BF	chr2	30445721	0.0121213	0.972476
AF	chr5	6819168	2.88485	0.0013036	BF	chr2	31684557	0.0121213	0.972476
AF	chr5	10421379	2.88485	0.0013036	BF	chr2	32518500	0.0121213	0.972476
AF	chr5	20308648	2.88485	0.0013036	BF	chr2	38079129	0.0121213	0.972476
AF	chr5	20308660	2.88485	0.0013036	BF	chr2	39535486	0.0121213	0.972476
AF	chr5	37001254	2.88485	0.0013036	BF	chr2	39535487	0.0121213	0.972476
AF	chr4	3668036	2.88358	0.00130744	BF	chr3	2595466	0.0121213	0.972476
AF	chr4	5896869	2.88358	0.00130744	BF	chr3	6393465	0.0121213	0.972476
AF	chr3	32777502	2.88285	0.00130964	BF	chr3	6831471	0.0121213	0.972476
AF	chr4	28327127	2.88285	0.00130964	BF	chr3	10784166	0.0121213	0.972476
AF	chr5	2163780	2.88285	0.00130964	BF	chr3	14467992	0.0121213	0.972476
AF	chr6	15027508	2.88285	0.00130964	BF	chr3	15479826	0.0121213	0.972476
AF	chr7	34162315	2.88285	0.00130964	BF	chr3	15479828	0.0121213	0.972476
AF	chr5	8416499	2.88266	0.00131021	BF	chr3	23672460	0.0121213	0.972476
AF	chr5	8416516	2.88266	0.00131021	BF	chr3	23672465	0.0121213	0.972476
AF	chr5	8416534	2.88266	0.00131021	BF	chr3	23672488	0.0121213	0.972476
AF	chr5	8416535	2.88266	0.00131021	BF	chr3	23672491	0.0121213	0.972476
AF	chr1	1728305	2.88149	0.00131375	BF	chr3	23672503	0.0121213	0.972476
AF	chr7	36068615	2.88149	0.00131375	BF	chr3	23672515	0.0121213	0.972476
AF	chr1	18723542	2.88104	0.0013151	BF	chr3	27744190	0.0121213	0.972476
AF	chr1	19639411	2.88065	0.00131628	BF	chr3	27744215	0.0121213	0.972476
AF	chr2	32848715	2.88065	0.00131628	BF	chr3	29691455	0.0121213	0.972476
AF	chr2	36493514	2.88065	0.00131628	BF	chr3	30659560	0.0121213	0.972476
AF	chr2	36493516	2.88065	0.00131628	BF	chr3	30881392	0.0121213	0.972476
AF	chr3	24831464	2.88065	0.00131628	BF	chr3	33539301	0.0121213	0.972476
AF	chr3	32171818	2.88065	0.00131628	BF	chr3	35237586	0.0121213	0.972476
AF	chr3	32535722	2.88065	0.00131628	BF	chr3	35387113	0.0121213	0.972476
AF	chr3	38290588	2.88065	0.00131628	BF	chr3	37921561	0.0121213	0.972476
AF	chr3	42064869	2.88065	0.00131628	BF	chr3	37921566	0.0121213	0.972476
AF	chr4	5152449	2.88065	0.00131628	BF	chr3	38851492	0.0121213	0.972476
AF	chr4	8507724	2.88065	0.00131628	BF	chr4	982775	0.0121213	0.972476
AF	chr4	8507728	2.88065	0.00131628	BF	chr4	1834190	0.0121213	0.972476
AF	chr4	8507738	2.88065	0.00131628	BF	chr4	2931277	0.0121213	0.972476
AF	chr4	22654440	2.88065	0.00131628	BF	chr4	3168710	0.0121213	0.972476
AF	chr4	25696314	2.88065	0.00131628	BF	chr4	3180391	0.0121213	0.972476
AF	chr4	25696336	2.88065	0.00131628	BF	chr4	3180406	0.0121213	0.972476
AF	chr4	25696337	2.88065	0.00131628	BF	chr4	3542740	0.0121213	0.972476
AF	chr4	25696368	2.88065	0.00131628	BF	chr4	3684886	0.0121213	0.972476
AF	chr1	12579416	2.87994	0.00131844	BF	chr4	4248030	0.0121213	0.972476
AF	chr5	4950924	2.87886	0.00132171	BF	chr4	4695017	0.0121213	0.972476
AF	chr3	5597390	2.8776	0.00132557	BF	chr4	4695026	0.0121213	0.972476
AF	chr4	5398629	2.8754	0.0013323	BF	chr4	4695041	0.0121213	0.972476
AF	chr4	9865584	2.8754	0.0013323	BF	chr4	5021866	0.0121213	0.972476
AF	chr6	1163858	2.87346	0.00133827	BF	chr4	5033993	0.0121213	0.972476
AF	chr4	3479419	2.8721	0.00134247	BF	chr4	5048426	0.0121213	0.972476
AF	chr3	1056561	2.85339	0.00140156	BF	chr4	5093321	0.0121213	0.972476
AF	chr3	1056594	2.85339	0.00140156	BF	chr4	5208595	0.0121213	0.972476
AF	chr3	1056605	2.85339	0.00140156	BF	chr4	5508397	0.0121213	0.972476
AF	chr3	21048972	2.85339	0.00140156	BF	chr4	5551498	0.0121213	0.972476
AF	chr6	22483506	2.85339	0.00140156	BF	chr4	5556047	0.0121213	0.972476
AF	chr2	21343174	2.848	0.00141905	BF	chr4	5710915	0.0121213	0.972476
AF	chr4	3800178	2.848	0.00141905	BF	chr4	5720882	0.0121213	0.972476
AF	chr4	3800201	2.848	0.00141905	BF	chr4	5757602	0.0121213	0.972476
AF	chr4	4477647	2.848	0.00141905	BF	chr4	5782248	0.0121213	0.972476
AF	chr4	4553440	2.848	0.00141905	BF	chr4	5872850	0.0121213	0.972476
AF	chr4	4574076	2.848	0.00141905	BF	chr4	6122689	0.0121213	0.972476
AF	chr4	4574082	2.848	0.00141905	BF	chr4	6197169	0.0121213	0.972476
AF	chr4	4610302	2.848	0.00141905	BF	chr4	6305589	0.0121213	0.972476
AF	chr7	22215422	2.848	0.00141905	BF	chr4	6370608	0.0121213	0.972476
AF	chr1	698882	2.84466	0.00143003	BF	chr4	6690364	0.0121213	0.972476
AF	chr4	13241754	2.84466	0.00143003	BF	chr4	7475280	0.0121213	0.972476
AF	chr1	27256080	2.84457	0.00143032	BF	chr4	12993551	0.0121213	0.972476
AF	chr2	8427389	2.84457	0.00143032	BF	chr4	18171183	0.0121213	0.972476
AF	chr2	39100566	2.84457	0.00143032	BF	chr4	21110479	0.0121213	0.972476
AF	chr5	639686	2.84457	0.00143032	BF	chr4	24397762	0.0121213	0.972476
AF	chr5	10421396	2.84457	0.00143032	BF	chr4	25153976	0.0121213	0.972476
AF	chr3	31099641	2.8434	0.00143417	BF	chr4	25496091	0.0121213	0.972476
AF	chr7	31101308	2.84295	0.00143565	BF	chr4	25924325	0.0121213	0.972476
AF	chr1	6059862	2.84248	0.00143721	BF	chr4	27071228	0.0121213	0.972476
AF	chr1	18169719	2.84248	0.00143721	BF	chr4	33758166	0.0121213	0.972476
AF	chr2	32444336	2.84248	0.00143721	BF	chr5	6232274	0.0121213	0.972476
AF	chr4	4309495	2.84248	0.00143721	BF	chr5	7692967	0.0121213	0.972476
AF	chr5	6220729	2.84248	0.00143721	BF	chr5	9976131	0.0121213	0.972476
AF	chr5	15147590	2.84248	0.00143721	BF	chr5	11262601	0.0121213	0.972476
AF	chr3	32434851	2.84077	0.00144287	BF	chr5	13732936	0.0121213	0.972476
AF	chr6	1679638	2.84077	0.00144287	BF	chr5	14381792	0.0121213	0.972476
AF	chr6	8467823	2.84077	0.00144287	BF	chr5	15860556	0.0121213	0.972476
AF	chr5	2946529	2.83913	0.00144833	BF	chr5	18060799	0.0121213	0.972476
AF	chr4	4384010	2.8376	0.00145346	BF	chr5	23351986	0.0121213	0.972476
AF	chr7	654387	2.8376	0.00145346	BF	chr6	1072455	0.0121213	0.972476
AF	chr4	10018872	2.83583	0.00145938	BF	chr6	1544543	0.0121213	0.972476
AF	chr4	17806538	2.83559	0.00146019	BF	chr6	1902217	0.0121213	0.972476
AF	chr3	29283536	2.83114	0.00147523	BF	chr6	4352967	0.0121213	0.972476
AF	chr4	3506181	2.83114	0.00147523	BF	chr6	17226784	0.0121213	0.972476
AF	chr4	3506204	2.83114	0.00147523	BF	chr6	33843135	0.0121213	0.972476
AF	chr4	3517406	2.83114	0.00147523	BF	chr6	38503407	0.0121213	0.972476
AF	chr4	3542621	2.83114	0.00147523	BF	chr7	28083187	0.0121213	0.972476
AF	chr4	3685165	2.83114	0.00147523	BF	chr7	28083205	0.0121213	0.972476
AF	chr4	3820206	2.83114	0.00147523	BF	chr7	28610226	0.0121213	0.972476
AF	chr4	3864122	2.83114	0.00147523	BF	chr7	30209481	0.0121213	0.972476
AF	chr4	3892881	2.83114	0.00147523	BF	chr7	32695689	0.0121213	0.972476
AF	chr4	3892883	2.83114	0.00147523	BF	chr7	34916816	0.0121213	0.972476
AF	chr4	3925541	2.83114	0.00147523	BF	chr7	36713826	0.0121213	0.972476
AF	chr4	3981994	2.83114	0.00147523	BF	chr7	37809333	0.0121213	0.972476
AF	chr4	4033495	2.83114	0.00147523	BF	chr7	38623055	0.0121213	0.972476
AF	chr4	4033543	2.83114	0.00147523	BF	chr7	38624535	0.0121213	0.972476
AF	chr4	4062427	2.83114	0.00147523	BF	chr7	38673787	0.0121213	0.972476
AF	chr4	4062454	2.83114	0.00147523	BF	chr7	38766124	0.0121213	0.972476
AF	chr4	4161909	2.83114	0.00147523	BF	chr7	38857501	0.0121213	0.972476
AF	chr4	4166817	2.83114	0.00147523	BF	chr7	38865760	0.0121213	0.972476
AF	chr4	4315984	2.83114	0.00147523	BF	chr7	39012400	0.0121213	0.972476
AF	chr4	4346330	2.83114	0.00147523	BF	chr7	39284265	0.0121213	0.972476
AF	chr4	4989331	2.83114	0.00147523	BF	chr7	39701461	0.0121213	0.972476
AF	chr4	5152411	2.83114	0.00147523	BF	chr7	39724885	0.0121213	0.972476
AF	chr7	32416142	2.82834	0.00148476	BF	chr7	40330453	0.0121213	0.972476
AF	chr4	5549668	2.82799	0.00148596	BF	chr7	40410250	0.0121213	0.972476
AF	chr4	32220938	2.8279	0.00148629	BF	chr7	40640096	0.0121213	0.972476
AF	chr5	10421425	2.82781	0.0014866	BF	chr7	41079245	0.0121213	0.972476
AF	chr6	27830127	2.82781	0.0014866	BF	chr7	41163830	0.0121213	0.972476
AF	chr4	3668096	2.82629	0.00149179	BF	chr2	2233330	0.0130833	0.970324
AF	chr2	17413131	2.82572	0.00149376	BF	chr2	18769434	0.0130833	0.970324
AF	chr3	29010519	2.82572	0.00149376	BF	chr2	38247163	0.0130833	0.970324
AF	chr3	35217620	2.82572	0.00149376	BF	chr3	13729224	0.0130833	0.970324
AF	chr3	35356178	2.82572	0.00149376	BF	chr3	21064485	0.0130833	0.970324
AF	chr3	38579409	2.82572	0.00149376	BF	chr3	29563635	0.0130833	0.970324
AF	chr3	43044019	2.82572	0.00149376	BF	chr3	35937954	0.0130833	0.970324
AF	chr3	43273258	2.82572	0.00149376	BF	chr4	984919	0.0130833	0.970324
AF	chr3	43273291	2.82572	0.00149376	BF	chr4	28959202	0.0130833	0.970324
AF	chr4	3578095	2.82572	0.00149376	BF	chr4	29656838	0.0130833	0.970324
AF	chr4	15792818	2.82572	0.00149376	BF	chr4	33630889	0.0130833	0.970324
AF	chr4	26225752	2.82572	0.00149376	BF	chr5	33270255	0.0130833	0.970324
AF	chr3	31099634	2.82423	0.00149888	BF	chr5	33414449	0.0130833	0.970324
AF	chr4	4396822	2.82423	0.00149888	BF	chr6	1478905	0.0130833	0.970324
AF	chr1	12173954	2.82412	0.00149928	BF	chr6	39821284	0.0130833	0.970324
AF	chr4	33138685	2.82412	0.00149928	BF	chr6	43720711	0.0130833	0.970324
AF	chr6	29993310	2.82412	0.00149928	BF	chr7	15840472	0.0130833	0.970324
AF	chr1	12173959	2.82401	0.00149964	BF	chr7	37323042	0.0130833	0.970324
AF	chr1	12174001	2.82401	0.00149964	BF	chr1	970089	0.0141801	0.967876
AF	chr4	3495249	2.82401	0.00149964	BF	chr1	6309199	0.0141801	0.967876
AF	chr3	34861534	2.82353	0.00150132	BF	chr1	7205929	0.0141801	0.967876
AF	chr3	41043484	2.82353	0.00150132	BF	chr1	7989386	0.0141801	0.967876
AF	chr3	41855922	2.82353	0.00150132	BF	chr2	2600579	0.0141801	0.967876
AF	chr4	5152445	2.82353	0.00150132	BF	chr2	20967441	0.0141801	0.967876
AF	chr4	10077626	2.82353	0.00150132	BF	chr3	29451484	0.0141801	0.967876
AF	chr4	24841044	2.82353	0.00150132	BF	chr3	38389479	0.0141801	0.967876
AF	chr4	25827310	2.82353	0.00150132	BF	chr5	10195267	0.0141801	0.967876
AF	chr5	3093469	2.82353	0.00150132	BF	chr5	10195303	0.0141801	0.967876
AF	chr5	4339136	2.82353	0.00150132	BF	chr5	10379438	0.0141801	0.967876
AF	chr5	4339142	2.82353	0.00150132	BF	chr5	37076273	0.0141801	0.967876
AF	chr5	6492350	2.82353	0.00150132	BF	chr5	37685618	0.0141801	0.967876
AF	chr1	1866958	2.82174	0.00150751	BF	chr7	3799625	0.0141801	0.967876
AF	chr2	12734761	2.82174	0.00150751	BF	chr7	32424677	0.0141801	0.967876
AF	chr3	31471022	2.82174	0.00150751	BF	chr7	36534703	0.0141801	0.967876
AF	chr3	31532336	2.82174	0.00150751	BF	chr7	36534739	0.0141801	0.967876
AF	chr4	10156828	2.82174	0.00150751	BF	chr1	4900190	0.0154397	0.965073
AF	chr4	10156838	2.82174	0.00150751	BF	chr1	30042244	0.0154397	0.965073
AF	chr4	10156839	2.82174	0.00150751	BF	chr2	13120491	0.0154397	0.965073
AF	chr4	10786053	2.82174	0.00150751	BF	chr2	20148416	0.0154397	0.965073
AF	chr4	24653336	2.82174	0.00150751	BF	chr2	38246987	0.0154397	0.965073
AF	chr4	24653342	2.82174	0.00150751	BF	chr3	8660582	0.0154397	0.965073
AF	chr5	1762724	2.82174	0.00150751	BF	chr4	15273277	0.0154397	0.965073
AF	chr6	40404186	2.82174	0.00150751	BF	chr1	16787615	0.016898	0.961838
AF	chr4	2215304	2.81123	0.00154443	BF	chr1	16787619	0.016898	0.961838
AF	chr4	3549917	2.80793	0.00155621	BF	chr2	12727637	0.016898	0.961838
AF	chr6	6549131	2.80704	0.00155942	BF	chr2	15171865	0.016898	0.961838
AF	chr6	26775792	2.80704	0.00155942	BF	chr2	15171881	0.016898	0.961838
AF	chr1	13692055	2.80691	0.00155988	BF	chr3	37827742	0.016898	0.961838
AF	chr4	1149618	2.80691	0.00155988	BF	chr4	14137150	0.016898	0.961838
AF	chr7	5323238	2.80669	0.00156068	BF	chr5	22426741	0.016898	0.961838
AF	chr3	31028384	2.80659	0.00156103	BF	chr5	37030052	0.016898	0.961838
AF	chr3	34719227	2.80659	0.00156103	BF	chr6	32327135	0.016898	0.961838
AF	chr3	41789915	2.80659	0.00156103	BF	chr7	2113146	0.016898	0.961838
AF	chr5	6511701	2.80659	0.00156103	BF	chr7	36114290	0.016898	0.961838
AF	chr7	35617435	2.80659	0.00156103	BF	chr1	3257948	0.0186022	0.958071
AF	chr3	36299586	2.80441	0.00156887	BF	chr1	31176642	0.0186022	0.958071
AF	chr3	43428997	2.80441	0.00156887	BF	chr2	12308956	0.0186022	0.958071
AF	chr3	43429005	2.80441	0.00156887	BF	chr3	23593594	0.0186022	0.958071
AF	chr4	3112745	2.80441	0.00156887	BF	chr3	28425416	0.0186022	0.958071
AF	chr6	27872230	2.80441	0.00156887	BF	chr3	36856025	0.0186022	0.958071
AF	chr4	5083661	2.79271	0.00161173	BF	chr4	3708994	0.0186022	0.958071
AF	chr2	25111432	2.79253	0.00161239	BF	chr4	24672005	0.0186022	0.958071
AF	chr5	4931528	2.79154	0.00161607	BF	chr5	32040035	0.0186022	0.958071
AF	chr4	5038146	2.79029	0.00162074	BF	chr6	23322761	0.0186022	0.958071
AF	chr4	6081361	2.79029	0.00162074	BF	chr7	35685176	0.0186022	0.958071
AF	chr3	41520547	2.78984	0.0016224	BF	chr1	3946054	0.0206146	0.953642
AF	chr3	42855232	2.78984	0.0016224	BF	chr2	11422357	0.0206146	0.953642
AF	chr5	10421431	2.78984	0.0016224	BF	chr2	15317581	0.0206146	0.953642
AF	chr7	2084174	2.78984	0.0016224	BF	chr2	20786289	0.0206146	0.953642
AF	chr2	33749233	2.78961	0.00162327	BF	chr3	8064704	0.0206146	0.953642
AF	chr4	2648305	2.78846	0.00162758	BF	chr3	39177693	0.0206146	0.953642
AF	chr4	3243105	2.78797	0.00162941	BF	chr4	34762718	0.0206146	0.953642
AF	chr4	33375068	2.78777	0.00163017	BF	chr3	34433258	0.0230196	0.948376
AF	chr5	2535821	2.78777	0.00163017	BF	chr3	40397969	0.0230196	0.948376
AF	chr3	36571992	2.78767	0.00163055	BF	chr7	36114286	0.0230196	0.948376
AF	chr4	11147918	2.78767	0.00163055	BF	chr7	41108642	0.0230196	0.948376
AF	chr5	4793621	2.78767	0.00163055	BF	chr1	6763349	0.0259339	0.942033
AF	chr5	34303108	2.78767	0.00163055	BF	chr2	30891252	0.0259339	0.942033
AF	chr6	22600513	2.78767	0.00163055	BF	chr2	30891257	0.0259339	0.942033
AF	chr6	28081196	2.78767	0.00163055	BF	chr3	12215749	0.0259339	0.942033
AF	chr6	28081219	2.78767	0.00163055	BF	chr3	25977528	0.0259339	0.942033
AF	chr4	2133328	2.78766	0.00163056	BF	chr5	4864456	0.0259339	0.942033
AF	chr7	3178926	2.78766	0.00163056	BF	chr5	35805528	0.0259339	0.942033
AF	chr5	1168189	2.78765	0.00163061	BF	chr5	35805548	0.0259339	0.942033
AF	chr5	6635656	2.78765	0.00163061	BF	chr6	37158310	0.0259339	0.942033
AF	chr5	6635675	2.78765	0.00163061	BF	chr1	2632204	0.0267601	0.940242
AF	chr5	6635676	2.78765	0.00163061	BF	chr1	3581146	0.0267601	0.940242
AF	chr4	13299507	2.78724	0.00163214	BF	chr1	4512275	0.0267601	0.940242
AF	chr3	22287487	2.78548	0.0016388	BF	chr1	4697192	0.0267601	0.940242
AF	chr3	30810222	2.78548	0.0016388	BF	chr1	5058767	0.0267601	0.940242
AF	chr3	30810240	2.78548	0.0016388	BF	chr1	30036993	0.0267601	0.940242
AF	chr3	34459592	2.78548	0.0016388	BF	chr2	681637	0.0267601	0.940242
AF	chr4	5789356	2.78548	0.0016388	BF	chr2	1038807	0.0267601	0.940242
AF	chr4	6274294	2.78548	0.0016388	BF	chr2	1082982	0.0267601	0.940242
AF	chr4	29471757	2.78548	0.0016388	BF	chr2	1452423	0.0267601	0.940242
AF	chr6	13484960	2.78548	0.0016388	BF	chr2	1464858	0.0267601	0.940242
AF	chr1	6059834	2.78539	0.00163911	BF	chr2	2114166	0.0267601	0.940242
AF	chr3	13857553	2.78539	0.00163911	BF	chr2	2456340	0.0267601	0.940242
AF	chr3	13857581	2.78539	0.00163911	BF	chr2	3583201	0.0267601	0.940242
AF	chr3	35893058	2.78539	0.00163911	BF	chr2	11786050	0.0267601	0.940242
AF	chr4	3112789	2.78539	0.00163911	BF	chr2	20980132	0.0267601	0.940242
AF	chr4	3725525	2.78493	0.00164085	BF	chr2	28633143	0.0267601	0.940242
AF	chr4	6355206	2.78003	0.00165947	BF	chr2	36973141	0.0267601	0.940242
AF	chr4	7433338	2.78003	0.00165947	BF	chr2	39411421	0.0267601	0.940242
AF	chr4	2395013	2.77985	0.00166015	BF	chr3	3285998	0.0267601	0.940242
AF	chr4	2395023	2.77985	0.00166015	BF	chr3	20782385	0.0267601	0.940242
AF	chr2	36896895	2.77894	0.00166365	BF	chr3	25894796	0.0267601	0.940242
AF	chr4	5663604	2.77894	0.00166365	BF	chr3	25894800	0.0267601	0.940242
AF	chr2	15854435	2.77886	0.00166394	BF	chr3	26204399	0.0267601	0.940242
AF	chr3	4166930	2.77886	0.00166394	BF	chr3	28864821	0.0267601	0.940242
AF	chr3	42145757	2.77886	0.00166394	BF	chr4	830191	0.0267601	0.940242
AF	chr5	1047877	2.77886	0.00166394	BF	chr4	986262	0.0267601	0.940242
AF	chr7	3858188	2.77886	0.00166394	BF	chr4	2084239	0.0267601	0.940242
AF	chr7	27810371	2.77886	0.00166394	BF	chr4	2208761	0.0267601	0.940242
AF	chr4	5663639	2.777	0.0016711	BF	chr4	2944763	0.0267601	0.940242
AF	chr5	35393910	2.777	0.0016711	BF	chr4	3290129	0.0267601	0.940242
AF	chr6	29580827	2.777	0.0016711	BF	chr4	3485928	0.0267601	0.940242
AF	chr2	26000492	2.77693	0.00167135	BF	chr4	3485934	0.0267601	0.940242
AF	chr3	497828	2.77693	0.00167135	BF	chr4	3506170	0.0267601	0.940242
AF	chr3	11190679	2.77693	0.00167135	BF	chr4	3800212	0.0267601	0.940242
AF	chr3	11190689	2.77693	0.00167135	BF	chr4	4326893	0.0267601	0.940242
AF	chr3	11190696	2.77693	0.00167135	BF	chr4	5665752	0.0267601	0.940242
AF	chr3	23591724	2.77693	0.00167135	BF	chr4	6081148	0.0267601	0.940242
AF	chr3	31633854	2.77693	0.00167135	BF	chr4	6161710	0.0267601	0.940242
AF	chr3	34302822	2.77693	0.00167135	BF	chr4	13771582	0.0267601	0.940242
AF	chr4	5525180	2.77693	0.00167135	BF	chr4	13771603	0.0267601	0.940242
AF	chr4	6205510	2.77693	0.00167135	BF	chr4	13771606	0.0267601	0.940242
AF	chr4	9572620	2.77693	0.00167135	BF	chr4	13771610	0.0267601	0.940242
AF	chr5	6213501	2.77693	0.00167135	BF	chr4	13771614	0.0267601	0.940242
AF	chr5	6213516	2.77693	0.00167135	BF	chr4	17332585	0.0267601	0.940242
AF	chr5	6213551	2.77693	0.00167135	BF	chr4	22346588	0.0267601	0.940242
AF	chr6	6549179	2.77693	0.00167135	BF	chr4	24188546	0.0267601	0.940242
AF	chr6	24937158	2.77693	0.00167135	BF	chr4	24215704	0.0267601	0.940242
AF	chr7	34307097	2.77693	0.00167135	BF	chr4	24246763	0.0267601	0.940242
AF	chr1	9859590	2.77499	0.00167883	BF	chr4	33228302	0.0267601	0.940242
AF	chr2	28198605	2.77499	0.00167883	BF	chr4	33228430	0.0267601	0.940242
AF	chr3	28571549	2.77499	0.00167883	BF	chr5	3312318	0.0267601	0.940242
AF	chr3	30851819	2.77499	0.00167883	BF	chr5	3312339	0.0267601	0.940242
AF	chr3	35141716	2.77499	0.00167883	BF	chr5	6310774	0.0267601	0.940242
AF	chr3	41549632	2.77499	0.00167883	BF	chr5	8668784	0.0267601	0.940242
AF	chr6	24832463	2.77499	0.00167883	BF	chr5	11262584	0.0267601	0.940242
AF	chr7	2632540	2.77499	0.00167883	BF	chr5	38217897	0.0267601	0.940242
AF	chr4	4262025	2.77162	0.00169192	BF	chr6	203970	0.0267601	0.940242
AF	chr1	15494615	2.77103	0.00169424	BF	chr6	1040716	0.0267601	0.940242
AF	chr3	30155348	2.77103	0.00169424	BF	chr6	33843486	0.0267601	0.940242
AF	chr3	36100165	2.77103	0.00169424	BF	chr6	34797513	0.0267601	0.940242
AF	chr4	5283987	2.77103	0.00169424	BF	chr6	40062690	0.0267601	0.940242
AF	chr4	7442304	2.77103	0.00169424	BF	chr7	4489769	0.0267601	0.940242
AF	chr5	6841567	2.77103	0.00169424	BF	chr7	7088815	0.0267601	0.940242
AF	chr5	6841584	2.77103	0.00169424	BF	chr7	37732633	0.0267601	0.940242
AF	chr5	6228758	2.77092	0.00169465	BF	chr7	38375608	0.0267601	0.940242
AF	chr4	3180490	2.77009	0.00169788	BF	chr7	38624723	0.0267601	0.940242
AF	chr4	4122219	2.77009	0.00169788	BF	chr7	38700316	0.0267601	0.940242
AF	chr4	6159046	2.76884	0.0017028	BF	chr7	38840160	0.0267601	0.940242
AF	chr7	3816746	2.76874	0.00170318	BF	chr7	38970328	0.0267601	0.940242
AF	chr3	42586530	2.76873	0.00170322	BF	chr7	38970337	0.0267601	0.940242
AF	chr3	43463143	2.76865	0.00170354	BF	chr7	39023878	0.0267601	0.940242
AF	chr4	6503194	2.76865	0.00170354	BF	chr7	39537428	0.0267601	0.940242
AF	chr4	7891998	2.76865	0.00170354	BF	chr7	39587944	0.0267601	0.940242
AF	chr4	18018157	2.76865	0.00170354	BF	chr7	39949611	0.0267601	0.940242
AF	chr5	1219422	2.76865	0.00170354	BF	chr7	40151835	0.0267601	0.940242
AF	chr5	1219446	2.76865	0.00170354	BF	chr7	40608040	0.0267601	0.940242
AF	chr5	1219464	2.76865	0.00170354	BF	chr7	40730940	0.0267601	0.940242
AF	chr5	5838030	2.76865	0.00170354	BF	chr7	40981376	0.0267601	0.940242
AF	chr6	24717726	2.76865	0.00170354	BF	chr1	1155623	0.0287891	0.93586
AF	chr6	27894458	2.76865	0.00170354	BF	chr1	1155647	0.0287891	0.93586
AF	chr4	3655217	2.76827	0.001705	BF	chr1	3941769	0.0287891	0.93586
AF	chr3	25745448	2.76646	0.00171215	BF	chr1	4640434	0.0287891	0.93586
AF	chr3	26444053	2.76646	0.00171215	BF	chr1	4833538	0.0287891	0.93586
AF	chr3	32432117	2.76646	0.00171215	BF	chr1	5320495	0.0287891	0.93586
AF	chr3	34261596	2.76646	0.00171215	BF	chr1	6494464	0.0287891	0.93586
AF	chr3	35418935	2.76646	0.00171215	BF	chr2	829815	0.0287891	0.93586
AF	chr3	39390180	2.76646	0.00171215	BF	chr2	1082939	0.0287891	0.93586
AF	chr3	42858515	2.76646	0.00171215	BF	chr2	1232003	0.0287891	0.93586
AF	chr4	6960907	2.76646	0.00171215	BF	chr2	1379017	0.0287891	0.93586
AF	chr4	24841060	2.76646	0.00171215	BF	chr2	7382346	0.0287891	0.93586
AF	chr5	11133334	2.76646	0.00171215	BF	chr2	10850923	0.0287891	0.93586
AF	chr4	4078457	2.76631	0.00171275	BF	chr2	14648019	0.0287891	0.93586
AF	chr4	4771549	2.76631	0.00171275	BF	chr2	17963429	0.0287891	0.93586
AF	chr4	11502617	2.76449	0.00171993	BF	chr2	40456533	0.0287891	0.93586
AF	chr1	7482947	2.75982	0.00173853	BF	chr3	9994706	0.0287891	0.93586
AF	chr4	3990591	2.75672	0.00175098	BF	chr3	14467913	0.0287891	0.93586
AF	chr4	3708858	2.75663	0.00175134	BF	chr3	31503282	0.0287891	0.93586
AF	chr3	26897703	2.74702	0.00179052	BF	chr3	37518147	0.0287891	0.93586
AF	chr7	123276	2.7444	0.00180136	BF	chr3	38812572	0.0287891	0.93586
AF	chr2	35050169	2.74272	0.00180832	BF	chr3	43620843	0.0287891	0.93586
AF	chr4	25968274	2.74272	0.00180832	BF	chr4	3109834	0.0287891	0.93586
AF	chr2	31486514	2.74025	0.00181864	BF	chr4	3708932	0.0287891	0.93586
AF	chr4	5692273	2.7309	0.00185822	BF	chr4	5208637	0.0287891	0.93586
AF	chr1	1636678	2.7306	0.00185952	BF	chr4	17832161	0.0287891	0.93586
AF	chr6	1579641	2.72482	0.00188442	BF	chr4	21778731	0.0287891	0.93586
AF	chr6	41424560	2.71413	0.00193139	BF	chr4	22236893	0.0287891	0.93586
AF	chr4	7701687	2.71358	0.00193385	BF	chr4	22236894	0.0287891	0.93586
AF	chr1	11508721	2.71121	0.00194441	BF	chr4	23765848	0.0287891	0.93586
AF	chr1	22417631	2.71121	0.00194441	BF	chr4	25417398	0.0287891	0.93586
AF	chr1	30463190	2.71121	0.00194441	BF	chr4	32207215	0.0287891	0.93586
AF	chr4	32151108	2.71121	0.00194441	BF	chr5	4024573	0.0287891	0.93586
AF	chr5	3756426	2.71121	0.00194441	BF	chr5	4773399	0.0287891	0.93586
AF	chr6	36711923	2.71121	0.00194441	BF	chr5	11564092	0.0287891	0.93586
AF	chr1	2034401	2.70902	0.00195425	BF	chr5	34984328	0.0287891	0.93586
AF	chr3	40644774	2.70902	0.00195425	BF	chr6	23285140	0.0287891	0.93586
AF	chr1	14947081	2.7064	0.00196606	BF	chr6	32364074	0.0287891	0.93586
AF	chr4	9318687	2.70383	0.00197772	BF	chr7	30372537	0.0287891	0.93586
AF	chr4	5037919	2.70368	0.00197844	BF	chr7	33582487	0.0287891	0.93586
AF	chr5	7559796	2.70292	0.00198189	BF	chr7	33944189	0.0287891	0.93586
AF	chr5	15147593	2.70174	0.00198728	BF	chr7	34325760	0.0287891	0.93586
AF	chr5	33047109	2.70106	0.00199038	BF	chr7	35870243	0.0287891	0.93586
AF	chr7	30627029	2.70106	0.00199038	BF	chr7	38130393	0.0287891	0.93586
AF	chr1	24327243	2.70098	0.00199075	BF	chr7	39206928	0.0287891	0.93586
AF	chr1	24327273	2.70098	0.00199075	BF	chr7	39206958	0.0287891	0.93586
AF	chr3	31996405	2.70098	0.00199075	BF	chr7	40558822	0.0287891	0.93586
AF	chr3	31996406	2.70098	0.00199075	BF	chr1	7296559	0.0295234	0.934279
AF	chr3	42586874	2.70098	0.00199075	BF	chr2	958464	0.0295234	0.934279
AF	chr5	11226519	2.70098	0.00199075	BF	chr1	3831542	0.0310896	0.930916
AF	chr2	2584756	2.70092	0.00199105	BF	chr1	5052260	0.0310896	0.930916
AF	chr2	27605571	2.70092	0.00199105	BF	chr2	2398727	0.0310896	0.930916
AF	chr2	34635243	2.70092	0.00199105	BF	chr2	6838588	0.0310896	0.930916
AF	chr3	10064538	2.70092	0.00199105	BF	chr2	9457803	0.0310896	0.930916
AF	chr3	22819067	2.70092	0.00199105	BF	chr2	13480239	0.0310896	0.930916
AF	chr3	35845357	2.70092	0.00199105	BF	chr2	37852878	0.0310896	0.930916
AF	chr3	35845361	2.70092	0.00199105	BF	chr3	10322013	0.0310896	0.930916
AF	chr3	39326522	2.70092	0.00199105	BF	chr3	15832930	0.0310896	0.930916
AF	chr3	39326533	2.70092	0.00199105	BF	chr3	26866933	0.0310896	0.930916
AF	chr3	42223225	2.70092	0.00199105	BF	chr3	27097428	0.0310896	0.930916
AF	chr4	6312673	2.70092	0.00199105	BF	chr3	30597846	0.0310896	0.930916
AF	chr4	8033417	2.70092	0.00199105	BF	chr3	36120725	0.0310896	0.930916
AF	chr5	451724	2.70092	0.00199105	BF	chr3	37302158	0.0310896	0.930916
AF	chr5	1267322	2.70092	0.00199105	BF	chr3	39645005	0.0310896	0.930916
AF	chr5	6213548	2.70092	0.00199105	BF	chr4	1985275	0.0310896	0.930916
AF	chr7	29531899	2.70092	0.00199105	BF	chr4	1985285	0.0310896	0.930916
AF	chr7	29531902	2.70092	0.00199105	BF	chr4	6225369	0.0310896	0.930916
AF	chr4	4694978	2.69924	0.00199874	BF	chr4	6225372	0.0310896	0.930916
AF	chr4	4695023	2.69924	0.00199874	BF	chr5	12710570	0.0310896	0.930916
AF	chr4	5047961	2.69924	0.00199874	BF	chr5	35393911	0.0310896	0.930916
AF	chr4	25688627	2.69924	0.00199874	BF	chr5	36147835	0.0310896	0.930916
AF	chr6	36963197	2.69924	0.00199874	BF	chr6	38340187	0.0310896	0.930916
AF	chr2	8524626	2.69898	0.00199995	BF	chr7	29848872	0.0310896	0.930916
AF	chr2	28198562	2.69898	0.00199995	BF	chr7	33984589	0.0310896	0.930916
AF	chr3	32148450	2.69898	0.00199995	BF	chr7	35236911	0.0310896	0.930916
AF	chr3	35706632	2.69898	0.00199995	BF	chr7	36967077	0.0310896	0.930916
AF	chr3	38727715	2.69898	0.00199995	BF	chr7	38122818	0.0310896	0.930916
AF	chr4	28327173	2.69898	0.00199995	BF	chr7	40607659	0.0310896	0.930916
AF	chr7	35724393	2.69898	0.00199995	BF	chr1	1867577	0.0337156	0.925304
AF	chr6	12958182	2.69855	0.00200192	BF	chr1	6494196	0.0337156	0.925304
AF	chr4	25417431	2.69718	0.00200827	BF	chr2	1958240	0.0337156	0.925304
AF	chr5	38127380	2.69581	0.0020146	BF	chr2	13120482	0.0337156	0.925304
AF	chr4	7195992	2.69526	0.00201715	BF	chr2	14153564	0.0337156	0.925304
AF	chr1	8079935	2.69389	0.00202355	BF	chr2	16669539	0.0337156	0.925304
AF	chr2	3619043	2.69389	0.00202355	BF	chr2	36877243	0.0337156	0.925304
AF	chr2	21407514	2.69389	0.00202355	BF	chr3	9966199	0.0337156	0.925304
AF	chr2	21407519	2.69389	0.00202355	BF	chr3	11826858	0.0337156	0.925304
AF	chr2	22818562	2.69389	0.00202355	BF	chr3	13734520	0.0337156	0.925304
AF	chr2	31167329	2.69389	0.00202355	BF	chr3	32171689	0.0337156	0.925304
AF	chr2	40243952	2.69389	0.00202355	BF	chr3	34548340	0.0337156	0.925304
AF	chr3	27505515	2.69389	0.00202355	BF	chr4	292374	0.0337156	0.925304
AF	chr3	37601770	2.69389	0.00202355	BF	chr4	528935	0.0337156	0.925304
AF	chr3	41641944	2.69389	0.00202355	BF	chr4	22903135	0.0337156	0.925304
AF	chr4	1465488	2.69389	0.00202355	BF	chr5	2030134	0.0337156	0.925304
AF	chr4	11950151	2.69389	0.00202355	BF	chr5	39926313	0.0337156	0.925304
AF	chr5	4868468	2.69389	0.00202355	BF	chr7	3201834	0.0337156	0.925304
AF	chr6	26892811	2.69389	0.00202355	BF	chr7	40868205	0.0337156	0.925304
AF	chr7	39832641	2.69389	0.00202355	BF	chr3	34278522	0.0340303	0.924634
AF	chr4	342633	2.69079	0.00203801	BF	chr3	34278530	0.0340303	0.924634
AF	chr3	34940880	2.6899	0.0020422	BF	chr6	35316208	0.0340303	0.924634
AF	chr3	34940889	2.6899	0.0020422	BF	chr2	40044508	0.0367358	0.918891
AF	chr4	4228272	2.6877	0.00205257	BF	chr3	3320551	0.0367358	0.918891
AF	chr5	306699	2.68574	0.00206187	BF	chr3	32145525	0.0367358	0.918891
AF	chr7	6475625	2.67631	0.00210712	BF	chr4	4614349	0.0367358	0.918891
AF	chr4	3913480	2.67562	0.00211045	BF	chr6	40029361	0.0367358	0.918891
AF	chr4	3913499	2.67562	0.00211045	BF	chr7	18591971	0.0367358	0.918891
AF	chr4	4797653	2.6752	0.00211251	BF	chr7	34956796	0.0367358	0.918891
AF	chr4	3892974	2.67077	0.00213419	BF	chr2	2100051	0.0402388	0.91151
AF	chr3	5810862	2.65702	0.00220284	BF	chr2	40491125	0.0402388	0.91151
AF	chr4	12895234	2.65702	0.00220284	BF	chr3	22899384	0.0402388	0.91151
AF	chr3	32171817	2.65662	0.00220484	BF	chr3	43590498	0.0402388	0.91151
AF	chr3	35313344	2.65662	0.00220484	BF	chr4	33133240	0.0402388	0.91151
AF	chr4	7939920	2.65662	0.00220484	BF	chr5	6899067	0.0402388	0.91151
AF	chr7	35662396	2.65634	0.00220626	BF	chr5	8839848	0.0402388	0.91151
AF	chr7	37528230	2.65634	0.00220626	BF	chr5	8839859	0.0402388	0.91151
AF	chr7	37528231	2.65634	0.00220626	BF	chr5	13653078	0.0402388	0.91151
AF	chr4	6312754	2.65547	0.00221068	BF	chr6	21503331	0.0402388	0.91151
AF	chr4	2526706	2.65525	0.00221184	BF	chr6	23322765	0.0402388	0.91151
AF	chr4	2526763	2.65525	0.00221184	BF	chr6	23322778	0.0402388	0.91151
AF	chr4	3817021	2.65525	0.00221184	BF	chr6	40075492	0.0402388	0.91151
AF	chr5	33031355	2.65525	0.00221184	BF	chr1	5875417	0.0443407	0.902941
AF	chr3	30824485	2.65426	0.00221686	BF	chr1	5875425	0.0443407	0.902941
AF	chr3	39178287	2.65426	0.00221686	BF	chr3	37354285	0.0443407	0.902941
AF	chr4	7256344	2.65426	0.00221686	BF	chr4	22759285	0.0443407	0.902941
AF	chr4	7365418	2.65426	0.00221686	BF	chr4	25001131	0.0443407	0.902941
AF	chr4	18535299	2.65426	0.00221686	BF	chr5	10528559	0.0443407	0.902941
AF	chr6	31043377	2.65426	0.00221686	BF	chr6	8752377	0.0443407	0.902941
AF	chr4	3976740	2.65196	0.00222865	BF	chr6	45967916	0.0443407	0.902941
AF	chr4	4367718	2.65196	0.00222865	BF	chr2	3681501	0.0491964	0.892902
AF	chr4	1829289	2.64995	0.00223896	BF	chr3	6844245	0.0491964	0.892902
AF	chr4	6721619	2.64995	0.00223896	BF	chr4	7326539	0.0491964	0.892902
AF	chr7	7464307	2.64995	0.00223896	BF	chr5	39821406	0.0491964	0.892902
AF	chr7	7464311	2.64995	0.00223896	BF	chr1	991511	0.0520864	0.88698
AF	chr4	3552460	2.64778	0.00225018	BF	chr1	1155682	0.0520864	0.88698
AF	chr6	26029246	2.64778	0.00225018	BF	chr1	1212314	0.0520864	0.88698
AF	chr7	16526868	2.64778	0.00225018	BF	chr1	4554695	0.0520864	0.88698
AF	chr4	10398825	2.64673	0.00225562	BF	chr1	4629330	0.0520864	0.88698
AF	chr4	10398859	2.64673	0.00225562	BF	chr1	4676998	0.0520864	0.88698
AF	chr4	10642234	2.64673	0.00225562	BF	chr2	678904	0.0520864	0.88698
AF	chr4	33375029	2.64615	0.00225867	BF	chr2	744451	0.0520864	0.88698
AF	chr5	2654901	2.64606	0.00225913	BF	chr2	1883205	0.0520864	0.88698
AF	chr5	5281909	2.64606	0.00225913	BF	chr2	1970207	0.0520864	0.88698
AF	chr6	1585819	2.64606	0.00225913	BF	chr2	2124172	0.0520864	0.88698
AF	chr7	311690	2.64606	0.00225913	BF	chr2	2126438	0.0520864	0.88698
AF	chr4	4111992	2.64555	0.00226178	BF	chr2	2251672	0.0520864	0.88698
AF	chr4	4933918	2.64555	0.00226178	BF	chr2	2251690	0.0520864	0.88698
AF	chr4	4933920	2.64555	0.00226178	BF	chr2	2417427	0.0520864	0.88698
AF	chr4	4933921	2.64555	0.00226178	BF	chr2	2586415	0.0520864	0.88698
AF	chr4	4984697	2.64555	0.00226178	BF	chr2	2597870	0.0520864	0.88698
AF	chr4	4984719	2.64555	0.00226178	BF	chr2	3319363	0.0520864	0.88698
AF	chr4	5668780	2.64555	0.00226178	BF	chr2	4078163	0.0520864	0.88698
AF	chr4	3501714	2.6452	0.00226363	BF	chr2	8757887	0.0520864	0.88698
AF	chr3	39635661	2.6448	0.00226569	BF	chr2	8758023	0.0520864	0.88698
AF	chr4	9858452	2.6448	0.00226569	BF	chr2	8758030	0.0520864	0.88698
AF	chr3	43162510	2.64421	0.00226875	BF	chr2	9914374	0.0520864	0.88698
AF	chr4	2022910	2.64412	0.00226921	BF	chr2	10816842	0.0520864	0.88698
AF	chr5	2750524	2.64412	0.00226921	BF	chr2	16241773	0.0520864	0.88698
AF	chr5	2750554	2.64412	0.00226921	BF	chr2	16749703	0.0520864	0.88698
AF	chr6	26010781	2.64412	0.00226921	BF	chr2	17156420	0.0520864	0.88698
AF	chr3	15479869	2.64398	0.00226998	BF	chr2	20107893	0.0520864	0.88698
AF	chr3	30825282	2.64398	0.00226998	BF	chr3	3528875	0.0520864	0.88698
AF	chr3	34137750	2.64398	0.00226998	BF	chr3	13449206	0.0520864	0.88698
AF	chr3	35914136	2.64398	0.00226998	BF	chr3	15495021	0.0520864	0.88698
AF	chr3	36843043	2.64398	0.00226998	BF	chr3	18193840	0.0520864	0.88698
AF	chr4	3028167	2.64398	0.00226998	BF	chr3	26417105	0.0520864	0.88698
AF	chr4	3028193	2.64398	0.00226998	BF	chr3	26937350	0.0520864	0.88698
AF	chr4	5803763	2.64398	0.00226998	BF	chr3	27924849	0.0520864	0.88698
AF	chr4	6525894	2.64398	0.00226998	BF	chr3	28518781	0.0520864	0.88698
AF	chr4	11502657	2.64398	0.00226998	BF	chr3	31554730	0.0520864	0.88698
AF	chr4	11502668	2.64398	0.00226998	BF	chr3	33713224	0.0520864	0.88698
AF	chr4	34243137	2.64398	0.00226998	BF	chr3	35031179	0.0520864	0.88698
AF	chr6	6549196	2.64398	0.00226998	BF	chr3	35404609	0.0520864	0.88698
AF	chr6	39378319	2.64398	0.00226998	BF	chr3	36828390	0.0520864	0.88698
AF	chr4	2027129	2.64204	0.00228011	BF	chr3	37193324	0.0520864	0.88698
AF	chr6	5935388	2.64204	0.00228011	BF	chr3	38073792	0.0520864	0.88698
AF	chr6	9476107	2.64204	0.00228011	BF	chr3	38830337	0.0520864	0.88698
AF	chr4	3435997	2.64112	0.00228498	BF	chr3	43494477	0.0520864	0.88698
AF	chr4	3517427	2.64112	0.00228498	BF	chr4	83412	0.0520864	0.88698
AF	chr4	3805818	2.64112	0.00228498	BF	chr4	955137	0.0520864	0.88698
AF	chr4	3982179	2.64112	0.00228498	BF	chr4	1240587	0.0520864	0.88698
AF	chr4	3997631	2.64112	0.00228498	BF	chr4	2434011	0.0520864	0.88698
AF	chr4	3997679	2.64112	0.00228498	BF	chr4	2535797	0.0520864	0.88698
AF	chr4	4147692	2.64112	0.00228498	BF	chr4	2566057	0.0520864	0.88698
AF	chr4	4181790	2.64112	0.00228498	BF	chr4	2648535	0.0520864	0.88698
AF	chr4	4916560	2.64112	0.00228498	BF	chr4	2889367	0.0520864	0.88698
AF	chr4	5525143	2.64112	0.00228498	BF	chr4	3158265	0.0520864	0.88698
AF	chr7	25112184	2.64112	0.00228498	BF	chr4	3158394	0.0520864	0.88698
AF	chr3	39942267	2.63119	0.00233783	BF	chr4	3173061	0.0520864	0.88698
AF	chr4	29657003	2.63119	0.00233783	BF	chr4	3267751	0.0520864	0.88698
AF	chr5	10686569	2.63119	0.00233783	BF	chr4	3284657	0.0520864	0.88698
AF	chr5	10686591	2.63119	0.00233783	BF	chr4	3346897	0.0520864	0.88698
AF	chr6	28491540	2.63119	0.00233783	BF	chr4	3408828	0.0520864	0.88698
AF	chr4	1829304	2.63108	0.0023384	BF	chr4	3408831	0.0520864	0.88698
AF	chr5	7259507	2.63108	0.0023384	BF	chr4	3501631	0.0520864	0.88698
AF	chr5	10686563	2.63108	0.0023384	BF	chr4	3517327	0.0520864	0.88698
AF	chr5	13278158	2.62882	0.00235063	BF	chr4	3597759	0.0520864	0.88698
AF	chr6	26029093	2.62882	0.00235063	BF	chr4	3599175	0.0520864	0.88698
AF	chr6	29787004	2.62882	0.00235063	BF	chr4	3645625	0.0520864	0.88698
AF	chr6	29787018	2.62882	0.00235063	BF	chr4	4525653	0.0520864	0.88698
AF	chr4	13006196	2.62858	0.00235189	BF	chr4	5145654	0.0520864	0.88698
AF	chr4	4989291	2.62535	0.00236947	BF	chr4	6104684	0.0520864	0.88698
AF	chr4	5046037	2.62535	0.00236947	BF	chr4	7225532	0.0520864	0.88698
AF	chr4	5125115	2.62535	0.00236947	BF	chr4	7225535	0.0520864	0.88698
AF	chr4	5189375	2.62535	0.00236947	BF	chr4	12993539	0.0520864	0.88698
AF	chr4	5190336	2.62535	0.00236947	BF	chr4	13771633	0.0520864	0.88698
AF	chr4	4434614	2.61999	0.00239892	BF	chr4	22640049	0.0520864	0.88698
AF	chr4	4491885	2.61999	0.00239892	BF	chr4	22829814	0.0520864	0.88698
AF	chr4	4776298	2.61999	0.00239892	BF	chr4	24065558	0.0520864	0.88698
AF	chr6	29004894	2.61894	0.00240469	BF	chr4	24655015	0.0520864	0.88698
AF	chr4	34193083	2.61881	0.00240539	BF	chr4	25709927	0.0520864	0.88698
AF	chr5	10535020	2.61881	0.00240539	BF	chr4	26122239	0.0520864	0.88698
AF	chr5	10535021	2.61881	0.00240539	BF	chr4	26122248	0.0520864	0.88698
AF	chr4	5789332	2.61869	0.00240608	BF	chr4	26122265	0.0520864	0.88698
AF	chr3	39739450	2.61859	0.00240662	BF	chr4	26124604	0.0520864	0.88698
AF	chr4	215385	2.6185	0.00240715	BF	chr4	26124607	0.0520864	0.88698
AF	chr4	5263919	2.61819	0.00240885	BF	chr4	26224566	0.0520864	0.88698
AF	chr4	12703092	2.61819	0.00240885	BF	chr4	26999869	0.0520864	0.88698
AF	chr1	25488917	2.61793	0.00241029	BF	chr4	27049596	0.0520864	0.88698
AF	chr1	25488941	2.61793	0.00241029	BF	chr4	33326578	0.0520864	0.88698
AF	chr3	29010536	2.61633	0.0024192	BF	chr5	3184779	0.0520864	0.88698
AF	chr3	38475376	2.61633	0.0024192	BF	chr5	4371295	0.0520864	0.88698
AF	chr3	39037639	2.61633	0.0024192	BF	chr5	4773422	0.0520864	0.88698
AF	chr3	39187359	2.61633	0.0024192	BF	chr5	4916497	0.0520864	0.88698
AF	chr3	41772012	2.61633	0.0024192	BF	chr5	5024618	0.0520864	0.88698
AF	chr4	17058575	2.61633	0.0024192	BF	chr5	6000362	0.0520864	0.88698
AF	chr5	6888157	2.61633	0.0024192	BF	chr5	7011871	0.0520864	0.88698
AF	chr7	1239114	2.61633	0.0024192	BF	chr5	15137119	0.0520864	0.88698
AF	chr4	4477685	2.61392	0.00243265	BF	chr5	15817692	0.0520864	0.88698
AF	chr4	4553464	2.61392	0.00243265	BF	chr5	15899806	0.0520864	0.88698
AF	chr4	3881674	2.60867	0.00246226	BF	chr5	27824911	0.0520864	0.88698
AF	chr1	26444468	2.60854	0.00246298	BF	chr5	29889319	0.0520864	0.88698
AF	chr3	37215839	2.60854	0.00246298	BF	chr5	35488061	0.0520864	0.88698
AF	chr5	6964322	2.60854	0.00246298	BF	chr6	20564833	0.0520864	0.88698
AF	chr4	5398455	2.60832	0.00246424	BF	chr6	23285160	0.0520864	0.88698
AF	chr6	24452117	2.60832	0.00246424	BF	chr6	32942480	0.0520864	0.88698
AF	chr3	24002818	2.60822	0.00246478	BF	chr6	34127086	0.0520864	0.88698
AF	chr3	42855175	2.60822	0.00246478	BF	chr6	34249759	0.0520864	0.88698
AF	chr3	43582522	2.60822	0.00246478	BF	chr6	36148599	0.0520864	0.88698
AF	chr6	1315540	2.60822	0.00246478	BF	chr7	3801764	0.0520864	0.88698
AF	chr7	206784	2.60822	0.00246478	BF	chr7	25115114	0.0520864	0.88698
AF	chr2	8999827	2.60712	0.00247103	BF	chr7	25115118	0.0520864	0.88698
AF	chr5	5347009	2.60638	0.00247523	BF	chr7	26003574	0.0520864	0.88698
AF	chr6	19326703	2.60638	0.00247523	BF	chr7	27460954	0.0520864	0.88698
AF	chr2	5346513	2.60629	0.00247578	BF	chr7	28749272	0.0520864	0.88698
AF	chr4	2022651	2.60629	0.00247578	BF	chr7	28749324	0.0520864	0.88698
AF	chr5	3572250	2.60629	0.00247578	BF	chr7	28804439	0.0520864	0.88698
AF	chr5	5281783	2.60629	0.00247578	BF	chr7	29547571	0.0520864	0.88698
AF	chr6	29117905	2.60629	0.00247578	BF	chr7	29783746	0.0520864	0.88698
AF	chr3	34137736	2.60605	0.00247712	BF	chr7	29814844	0.0520864	0.88698
AF	chr3	34137743	2.60605	0.00247712	BF	chr7	29859192	0.0520864	0.88698
AF	chr3	42272007	2.60605	0.00247712	BF	chr7	30059985	0.0520864	0.88698
AF	chr3	43490605	2.60605	0.00247712	BF	chr7	30059991	0.0520864	0.88698
AF	chr4	3106684	2.60605	0.00247712	BF	chr7	30207810	0.0520864	0.88698
AF	chr4	4302533	2.60605	0.00247712	BF	chr7	30209518	0.0520864	0.88698
AF	chr4	4302537	2.60605	0.00247712	BF	chr7	30242135	0.0520864	0.88698
AF	chr4	6138522	2.60605	0.00247712	BF	chr7	30242146	0.0520864	0.88698
AF	chr4	26703690	2.60605	0.00247712	BF	chr7	31159914	0.0520864	0.88698
AF	chr5	2761064	2.60605	0.00247712	BF	chr7	31209147	0.0520864	0.88698
AF	chr7	8108098	2.60605	0.00247712	BF	chr7	31209148	0.0520864	0.88698
AF	chr7	9522331	2.60437	0.00248675	BF	chr7	32186832	0.0520864	0.88698
AF	chr1	12257222	2.60412	0.00248817	BF	chr7	32359371	0.0520864	0.88698
AF	chr3	22129043	2.60412	0.00248817	BF	chr7	32596289	0.0520864	0.88698
AF	chr4	7613790	2.60412	0.00248817	BF	chr7	32596442	0.0520864	0.88698
AF	chr4	12022367	2.60412	0.00248817	BF	chr7	32978647	0.0520864	0.88698
AF	chr6	8498148	2.60412	0.00248817	BF	chr7	33868714	0.0520864	0.88698
AF	chr1	14427692	2.60253	0.00249727	BF	chr7	33998324	0.0520864	0.88698
AF	chr4	6137007	2.60212	0.00249965	BF	chr7	34357921	0.0520864	0.88698
AF	chr4	7903628	2.60212	0.00249965	BF	chr7	36385951	0.0520864	0.88698
AF	chr4	7903654	2.60212	0.00249965	BF	chr7	38122181	0.0520864	0.88698
AF	chr4	8973983	2.60212	0.00249965	BF	chr7	38509431	0.0520864	0.88698
AF	chr4	3446739	2.602	0.00250037	BF	chr7	38529943	0.0520864	0.88698
AF	chr4	3724242	2.602	0.00250037	BF	chr7	38640839	0.0520864	0.88698
AF	chr4	5533462	2.60196	0.00250057	BF	chr7	38954313	0.0520864	0.88698
AF	chr4	3817091	2.60194	0.00250066	BF	chr7	38954346	0.0520864	0.88698
AF	chr4	13104008	2.60103	0.00250593	BF	chr7	39083667	0.0520864	0.88698
AF	chr6	31933642	2.60103	0.00250593	BF	chr7	39106341	0.0520864	0.88698
AF	chr3	42145775	2.60096	0.00250636	BF	chr7	39129202	0.0520864	0.88698
AF	chr5	2394956	2.60096	0.00250636	BF	chr7	39179343	0.0520864	0.88698
AF	chr5	11810188	2.60096	0.00250636	BF	chr7	39682287	0.0520864	0.88698
AF	chr5	18042644	2.60096	0.00250636	BF	chr7	40164416	0.0520864	0.88698
AF	chr6	17671889	2.60096	0.00250636	BF	chr7	40280608	0.0520864	0.88698
AF	chr6	17671920	2.60096	0.00250636	BF	chr2	16434599	0.0550168	0.881015
AF	chr4	13299510	2.60041	0.00250954	BF	chr4	27207589	0.0550168	0.881015
AF	chr5	9006852	2.59986	0.00251271	BF	chr4	32316345	0.0550168	0.881015
AF	chr6	8971238	2.59986	0.00251271	BF	chr2	1083026	0.0560557	0.87891
AF	chr2	32444428	2.59974	0.00251338	BF	chr2	7867598	0.0560557	0.87891
AF	chr4	22871749	2.59974	0.00251338	BF	chr2	13093587	0.0560557	0.87891
AF	chr5	13562027	2.59974	0.00251338	BF	chr2	16516952	0.0560557	0.87891
AF	chr6	2030181	2.59974	0.00251338	BF	chr2	28596029	0.0560557	0.87891
AF	chr4	9968460	2.59964	0.00251399	BF	chr3	9188069	0.0560557	0.87891
AF	chr7	40986155	2.59964	0.00251399	BF	chr3	21064500	0.0560557	0.87891
AF	chr2	2979325	2.59903	0.00251748	BF	chr3	26867240	0.0560557	0.87891
AF	chr2	7569627	2.59903	0.00251748	BF	chr3	26867244	0.0560557	0.87891
AF	chr2	22818584	2.59903	0.00251748	BF	chr3	31522738	0.0560557	0.87891
AF	chr2	40456556	2.59903	0.00251748	BF	chr3	34082844	0.0560557	0.87891
AF	chr3	12717300	2.59903	0.00251748	BF	chr4	261663	0.0560557	0.87891
AF	chr3	34231362	2.59903	0.00251748	BF	chr4	1522720	0.0560557	0.87891
AF	chr3	34302829	2.59903	0.00251748	BF	chr4	3695173	0.0560557	0.87891
AF	chr3	40729112	2.59903	0.00251748	BF	chr4	6138306	0.0560557	0.87891
AF	chr4	4782330	2.59903	0.00251748	BF	chr5	5266170	0.0560557	0.87891
AF	chr4	15947335	2.59903	0.00251748	BF	chr5	12761260	0.0560557	0.87891
AF	chr6	15820629	2.59903	0.00251748	BF	chr5	14487873	0.0560557	0.87891
AF	chr6	24547724	2.59903	0.00251748	BF	chr6	1479048	0.0560557	0.87891
AF	chr6	24547731	2.59903	0.00251748	BF	chr6	15414339	0.0560557	0.87891
AF	chr6	24937187	2.59903	0.00251748	BF	chr7	533165	0.0560557	0.87891
AF	chr6	25468878	2.59903	0.00251748	BF	chr7	3816029	0.0560557	0.87891
AF	chr3	27283754	2.59737	0.00252713	BF	chr7	3816050	0.0560557	0.87891
AF	chr3	43712951	2.59737	0.00252713	BF	chr7	36515063	0.0560557	0.87891
AF	chr3	43712972	2.59737	0.00252713	BF	chr7	37700867	0.0560557	0.87891
AF	chr4	4246135	2.59737	0.00252713	BF	chr7	37700896	0.0560557	0.87891
AF	chr4	7355891	2.59737	0.00252713	BF	chr7	39560545	0.0560557	0.87891
AF	chr4	9119634	2.59737	0.00252713	BF	chr7	40164329	0.0560557	0.87891
AF	chr6	27352000	2.59737	0.00252713	BF	chr1	1867564	0.0605612	0.869839
AF	chr6	28932628	2.59737	0.00252713	BF	chr2	7698228	0.0605612	0.869839
AF	chr7	2422139	2.59737	0.00252713	BF	chr3	29957585	0.0605612	0.869839
AF	chr4	2243462	2.59577	0.00253647	BF	chr3	32780435	0.0605612	0.869839
AF	chr5	33047105	2.59486	0.0025418	BF	chr4	309151	0.0605612	0.869839
AF	chr6	6868495	2.59486	0.0025418	BF	chr4	3692275	0.0605612	0.869839
AF	chr1	9859612	2.59286	0.00255352	BF	chr4	14336985	0.0605612	0.869839
AF	chr3	2682057	2.59286	0.00255352	BF	chr4	25497962	0.0605612	0.869839
AF	chr3	9499552	2.59286	0.00255352	BF	chr4	27434525	0.0605612	0.869839
AF	chr3	9499554	2.59286	0.00255352	BF	chr5	11374577	0.0605612	0.869839
AF	chr3	42495495	2.59286	0.00255352	BF	chr5	11374585	0.0605612	0.869839
AF	chr3	11941684	2.59196	0.00255883	BF	chr5	14307535	0.0605612	0.869839
AF	chr4	3737173	2.58947	0.00257353	BF	chr5	35731850	0.0605612	0.869839
AF	chr4	5142947	2.58947	0.00257353	BF	chr6	33422884	0.0605612	0.869839
AF	chr4	7395025	2.58947	0.00257353	BF	chr7	30539384	0.0605612	0.869839
AF	chr3	24002812	2.58936	0.00257416	BF	chr7	35984102	0.0605612	0.869839
AF	chr5	2934684	2.58936	0.00257416	BF	chr7	39574711	0.0605612	0.869839
AF	chr5	6685516	2.58936	0.00257416	BF	chr7	39574730	0.0605612	0.869839
AF	chr5	8323595	2.58936	0.00257416	BF	chr1	7296552	0.0620956	0.866771
AF	chr4	5754130	2.58754	0.00258501	BF	chr2	10427675	0.0620956	0.866771
AF	chr5	15817848	2.58754	0.00258501	BF	chr4	12475416	0.0620956	0.866771
AF	chr1	10082762	2.58743	0.00258564	BF	chr4	25547490	0.0620956	0.866771
AF	chr1	25893761	2.5871	0.00258761	BF	chr4	25547502	0.0620956	0.866771
AF	chr3	27886206	2.5871	0.00258761	BF	chr6	4693891	0.0620956	0.866771
AF	chr3	27886207	2.5871	0.00258761	BF	chr7	25499196	0.0620956	0.866771
AF	chr3	33721589	2.5871	0.00258761	BF	chr1	7754463	0.0657111	0.859585
AF	chr3	36082617	2.5871	0.00258761	BF	chr2	6397859	0.0657111	0.859585
AF	chr3	36267736	2.5871	0.00258761	BF	chr2	35506303	0.0657111	0.859585
AF	chr3	42766782	2.5871	0.00258761	BF	chr3	2792583	0.0657111	0.859585
AF	chr3	42766788	2.5871	0.00258761	BF	chr3	34277717	0.0657111	0.859585
AF	chr4	5047805	2.5871	0.00258761	BF	chr3	40929327	0.0657111	0.859585
AF	chr4	7394770	2.5871	0.00258761	BF	chr4	67401	0.0657111	0.859585
AF	chr4	15662108	2.5871	0.00258761	BF	chr4	29268428	0.0657111	0.859585
AF	chr4	15668378	2.5871	0.00258761	BF	chr5	6903103	0.0657111	0.859585
AF	chr4	15668409	2.5871	0.00258761	BF	chr5	7439040	0.0657111	0.859585
AF	chr4	26703627	2.5871	0.00258761	BF	chr5	11259369	0.0657111	0.859585
AF	chr5	1544151	2.5871	0.00258761	BF	chr5	29443972	0.0657111	0.859585
AF	chr5	8860478	2.5871	0.00258761	BF	chr5	29443976	0.0657111	0.859585
AF	chr3	13183023	2.58517	0.00259915	BF	chr5	37725641	0.0657111	0.859585
AF	chr3	13857556	2.58517	0.00259915	BF	chr6	11263952	0.0657111	0.859585
AF	chr3	40655271	2.58517	0.00259915	BF	chr3	11290601	0.0708535	0.849467
AF	chr3	42368379	2.58517	0.00259915	BF	chr3	32148580	0.0708535	0.849467
AF	chr3	43570267	2.58517	0.00259915	BF	chr3	39084276	0.0708535	0.849467
AF	chr4	10117664	2.58517	0.00259915	BF	chr2	27611412	0.0716434	0.847923
AF	chr5	4679955	2.58517	0.00259915	BF	chr3	24680967	0.0716434	0.847923
AF	chr5	16144498	2.58517	0.00259915	BF	chr3	40348520	0.0716434	0.847923
AF	chr6	18233516	2.58517	0.00259915	BF	chr4	6692607	0.0716434	0.847923
AF	chr4	6024273	2.55396	0.00279279	BF	chr4	35772864	0.0716434	0.847923
AF	chr3	23908721	2.55378	0.00279396	BF	chr5	8839853	0.0716434	0.847923
AF	chr3	36115561	2.55103	0.00281171	BF	chr5	35560722	0.0716434	0.847923
AF	chr3	36115563	2.55103	0.00281171	BF	chr6	40075531	0.0716434	0.847923
AF	chr3	42329344	2.55103	0.00281171	BF	chr7	40990989	0.0716434	0.847923
AF	chr4	25968327	2.55103	0.00281171	BF	chr2	35162631	0.078537	0.83457
AF	chr6	21045521	2.55103	0.00281171	BF	chr3	7643795	0.078537	0.83457
AF	chr6	12958179	2.55029	0.00281652	BF	chr3	29089719	0.078537	0.83457
AF	chr4	1394276	2.55015	0.00281744	BF	chr3	29089726	0.078537	0.83457
AF	chr4	1394288	2.55015	0.00281744	BF	chr5	4256606	0.078537	0.83457
AF	chr5	4914482	2.55015	0.00281744	BF	chr5	12968740	0.078537	0.83457
AF	chr5	6973914	2.54754	0.00283442	BF	chr5	39506835	0.078537	0.83457
AF	chr1	10082795	2.54575	0.0028461	BF	chr6	22210895	0.078537	0.83457
AF	chr4	21885202	2.54575	0.0028461	BF	chr7	553103	0.078537	0.83457
AF	chr5	2652355	2.54172	0.00287265	BF	chr7	37938788	0.078537	0.83457
AF	chr1	7205788	2.54153	0.00287387	BF	chr2	36923223	0.0819129	0.828108
AF	chr4	3997747	2.54133	0.00287519	BF	chr3	37370244	0.0819129	0.828108
AF	chr7	18978092	2.54133	0.00287519	BF	chr3	37370247	0.0819129	0.828108
AF	chr4	25347545	2.54017	0.0028829	BF	chr1	4834232	0.0833209	0.825428
AF	chr4	25347546	2.54017	0.0028829	BF	chr1	4857292	0.0833209	0.825428
AF	chr6	29598457	2.54017	0.0028829	BF	chr1	4897559	0.0833209	0.825428
AF	chr6	40717826	2.54017	0.0028829	BF	chr1	9776390	0.0833209	0.825428
AF	chr6	40717831	2.54017	0.0028829	BF	chr1	10296406	0.0833209	0.825428
AF	chr7	891645	2.5401	0.00288336	BF	chr1	25590796	0.0833209	0.825428
AF	chr3	27696245	2.53972	0.00288587	BF	chr2	738731	0.0833209	0.825428
AF	chr1	3256131	2.53825	0.00289567	BF	chr2	738732	0.0833209	0.825428
AF	chr1	19639391	2.53825	0.00289567	BF	chr2	1677165	0.0833209	0.825428
AF	chr2	5847928	2.53825	0.00289567	BF	chr2	1677172	0.0833209	0.825428
AF	chr2	12089173	2.53825	0.00289567	BF	chr2	2343588	0.0833209	0.825428
AF	chr2	16622573	2.53825	0.00289567	BF	chr2	2800379	0.0833209	0.825428
AF	chr2	16622579	2.53825	0.00289567	BF	chr2	3399935	0.0833209	0.825428
AF	chr2	16622581	2.53825	0.00289567	BF	chr2	3416387	0.0833209	0.825428
AF	chr2	16622584	2.53825	0.00289567	BF	chr2	3791153	0.0833209	0.825428
AF	chr3	30810022	2.53825	0.00289567	BF	chr2	3838797	0.0833209	0.825428
AF	chr3	34462066	2.53825	0.00289567	BF	chr2	4003465	0.0833209	0.825428
AF	chr3	40478010	2.53825	0.00289567	BF	chr2	4663622	0.0833209	0.825428
AF	chr3	40478011	2.53825	0.00289567	BF	chr2	4725473	0.0833209	0.825428
AF	chr3	42548421	2.53825	0.00289567	BF	chr2	9155869	0.0833209	0.825428
AF	chr4	6314648	2.53825	0.00289567	BF	chr2	10816940	0.0833209	0.825428
AF	chr5	13729469	2.53825	0.00289567	BF	chr2	11603315	0.0833209	0.825428
AF	chr6	25523039	2.53825	0.00289567	BF	chr2	14139423	0.0833209	0.825428
AF	chr7	23867652	2.53825	0.00289567	BF	chr2	29279155	0.0833209	0.825428
AF	chr7	39050281	2.53825	0.00289567	BF	chr2	31329693	0.0833209	0.825428
AF	chr1	2034400	2.52673	0.00297353	BF	chr2	31331902	0.0833209	0.825428
AF	chr3	35872580	2.52673	0.00297353	BF	chr2	31331905	0.0833209	0.825428
AF	chr4	19396883	2.52673	0.00297353	BF	chr2	36824060	0.0833209	0.825428
AF	chr5	16338559	2.52673	0.00297353	BF	chr2	38258204	0.0833209	0.825428
AF	chr6	12522961	2.52673	0.00297353	BF	chr2	40548591	0.0833209	0.825428
AF	chr4	2915211	2.52603	0.00297831	BF	chr3	5995330	0.0833209	0.825428
AF	chr4	12632845	2.52536	0.00298293	BF	chr3	7598383	0.0833209	0.825428
AF	chr5	2854545	2.52536	0.00298293	BF	chr3	7598426	0.0833209	0.825428
AF	chr5	2879468	2.52536	0.00298293	BF	chr3	7598431	0.0833209	0.825428
AF	chr5	2879471	2.52536	0.00298293	BF	chr3	22126700	0.0833209	0.825428
AF	chr2	15854441	2.52528	0.00298349	BF	chr3	24804081	0.0833209	0.825428
AF	chr2	33693856	2.52528	0.00298349	BF	chr3	30161702	0.0833209	0.825428
AF	chr3	31896479	2.52528	0.00298349	BF	chr3	36727416	0.0833209	0.825428
AF	chr5	7410441	2.52528	0.00298349	BF	chr3	36727425	0.0833209	0.825428
AF	chr5	8316667	2.52528	0.00298349	BF	chr4	985661	0.0833209	0.825428
AF	chr5	9774868	2.52528	0.00298349	BF	chr4	2093636	0.0833209	0.825428
AF	chr5	30564126	2.52528	0.00298349	BF	chr4	2785306	0.0833209	0.825428
AF	chr6	28399210	2.52528	0.00298349	BF	chr4	3304199	0.0833209	0.825428
AF	chr6	28399215	2.52528	0.00298349	BF	chr4	3304215	0.0833209	0.825428
AF	chr7	6185024	2.52528	0.00298349	BF	chr4	3304242	0.0833209	0.825428
AF	chr6	43206181	2.52465	0.00298778	BF	chr4	3612016	0.0833209	0.825428
AF	chr3	25894189	2.52328	0.00299722	BF	chr4	4154246	0.0833209	0.825428
AF	chr3	32099059	2.52328	0.00299722	BF	chr4	4754127	0.0833209	0.825428
AF	chr3	38290649	2.52328	0.00299722	BF	chr4	5398361	0.0833209	0.825428
AF	chr3	38356535	2.52328	0.00299722	BF	chr4	6101458	0.0833209	0.825428
AF	chr3	38356536	2.52328	0.00299722	BF	chr4	6156121	0.0833209	0.825428
AF	chr3	39300437	2.52328	0.00299722	BF	chr4	7248013	0.0833209	0.825428
AF	chr3	42146044	2.52328	0.00299722	BF	chr4	17480992	0.0833209	0.825428
AF	chr4	5396797	2.52328	0.00299722	BF	chr4	17835150	0.0833209	0.825428
AF	chr5	795870	2.52328	0.00299722	BF	chr4	20163283	0.0833209	0.825428
AF	chr5	5945300	2.52328	0.00299722	BF	chr4	23008498	0.0833209	0.825428
AF	chr6	24547742	2.52328	0.00299722	BF	chr4	24548455	0.0833209	0.825428
AF	chr6	24937181	2.52328	0.00299722	BF	chr4	26581632	0.0833209	0.825428
AF	chr4	2006047	2.52099	0.00301309	BF	chr4	26583709	0.0833209	0.825428
AF	chr7	36544202	2.51987	0.00302088	BF	chr4	26720061	0.0833209	0.825428
AF	chr2	256060	2.51983	0.00302117	BF	chr4	26988921	0.0833209	0.825428
AF	chr4	27763141	2.51919	0.00302557	BF	chr4	26988955	0.0833209	0.825428
AF	chr1	16027270	2.51911	0.00302613	BF	chr4	29656889	0.0833209	0.825428
AF	chr1	23991059	2.51911	0.00302613	BF	chr4	31405209	0.0833209	0.825428
AF	chr5	317922	2.51911	0.00302613	BF	chr5	4771829	0.0833209	0.825428
AF	chr5	1235688	2.51911	0.00302613	BF	chr5	4878850	0.0833209	0.825428
AF	chr5	3756393	2.51911	0.00302613	BF	chr5	6232091	0.0833209	0.825428
AF	chr1	3268780	2.51791	0.00303455	BF	chr5	12308096	0.0833209	0.825428
AF	chr1	3268824	2.51791	0.00303455	BF	chr5	31313701	0.0833209	0.825428
AF	chr3	34941137	2.51791	0.00303455	BF	chr5	31830382	0.0833209	0.825428
AF	chr4	2648550	2.51791	0.00303455	BF	chr5	31830385	0.0833209	0.825428
AF	chr6	45567068	2.51791	0.00303455	BF	chr5	40303261	0.0833209	0.825428
AF	chr7	3442064	2.51791	0.00303455	BF	chr6	401836	0.0833209	0.825428
AF	chr1	24388905	2.51712	0.00304006	BF	chr6	6324122	0.0833209	0.825428
AF	chr2	19957876	2.51712	0.00304006	BF	chr6	7736770	0.0833209	0.825428
AF	chr3	287021	2.51712	0.00304006	BF	chr6	16149608	0.0833209	0.825428
AF	chr3	35315128	2.51712	0.00304006	BF	chr6	16149623	0.0833209	0.825428
AF	chr6	29291435	2.51712	0.00304006	BF	chr6	16149636	0.0833209	0.825428
AF	chr6	29291445	2.51712	0.00304006	BF	chr6	32818081	0.0833209	0.825428
AF	chr4	3143854	2.51353	0.00306525	BF	chr6	38299633	0.0833209	0.825428
AF	chr4	4248267	2.51353	0.00306525	BF	chr7	1478208	0.0833209	0.825428
AF	chr3	26438289	2.51324	0.00306733	BF	chr7	18967383	0.0833209	0.825428
AF	chr5	3181033	2.51229	0.00307403	BF	chr7	22833306	0.0833209	0.825428
AF	chr5	3181058	2.51229	0.00307403	BF	chr7	24112645	0.0833209	0.825428
AF	chr6	4465479	2.51229	0.00307403	BF	chr7	25115145	0.0833209	0.825428
AF	chr6	29823445	2.51229	0.00307403	BF	chr7	27460946	0.0833209	0.825428
AF	chr6	43664300	2.51229	0.00307403	BF	chr7	27513284	0.0833209	0.825428
AF	chr3	41847497	2.51008	0.0030897	BF	chr7	28569800	0.0833209	0.825428
AF	chr3	41847504	2.51008	0.0030897	BF	chr7	29547503	0.0833209	0.825428
AF	chr2	15890623	2.50969	0.00309254	BF	chr7	29547512	0.0833209	0.825428
AF	chr2	36833913	2.50969	0.00309254	BF	chr7	29547522	0.0833209	0.825428
AF	chr3	11103798	2.50969	0.00309254	BF	chr7	29547539	0.0833209	0.825428
AF	chr4	2356100	2.50969	0.00309254	BF	chr7	29547557	0.0833209	0.825428
AF	chr4	10018849	2.50739	0.00310895	BF	chr7	30056413	0.0833209	0.825428
AF	chr3	40112662	2.49687	0.00318517	BF	chr7	30059659	0.0833209	0.825428
AF	chr4	9905843	2.49687	0.00318517	BF	chr7	31207253	0.0833209	0.825428
AF	chr7	36700652	2.49687	0.00318517	BF	chr7	31208923	0.0833209	0.825428
AF	chr2	15039214	2.49642	0.00318843	BF	chr7	31563594	0.0833209	0.825428
AF	chr2	4708660	2.49426	0.00320434	BF	chr7	32544119	0.0833209	0.825428
AF	chr2	7389379	2.49426	0.00320434	BF	chr7	32721443	0.0833209	0.825428
AF	chr5	306691	2.49426	0.00320434	BF	chr7	32721482	0.0833209	0.825428
AF	chr7	5015950	2.49426	0.00320434	BF	chr7	33413406	0.0833209	0.825428
AF	chr2	33774556	2.48575	0.00326777	BF	chr7	33588931	0.0833209	0.825428
AF	chr4	4346410	2.48575	0.00326777	BF	chr7	33998981	0.0833209	0.825428
AF	chr4	4346435	2.48575	0.00326777	BF	chr7	34007212	0.0833209	0.825428
AF	chr4	4808535	2.48575	0.00326777	BF	chr7	34357920	0.0833209	0.825428
AF	chr4	2432137	2.4854	0.00327043	BF	chr7	37448736	0.0833209	0.825428
AF	chr3	25943151	2.48539	0.00327046	BF	chr7	37871784	0.0833209	0.825428
AF	chr3	34053586	2.48539	0.00327046	BF	chr7	38113957	0.0833209	0.825428
AF	chr4	5549644	2.48539	0.00327046	BF	chr7	38742377	0.0833209	0.825428
AF	chr4	6370605	2.48539	0.00327046	BF	chr7	38974477	0.0833209	0.825428
AF	chr4	9865548	2.48539	0.00327046	BF	chr7	39053166	0.0833209	0.825428
AF	chr4	9865554	2.48539	0.00327046	BF	chr7	39264102	0.0833209	0.825428
AF	chr4	14964049	2.48539	0.00327046	BF	chr7	39264577	0.0833209	0.825428
AF	chr4	7493025	2.48516	0.00327223	BF	chr7	39264584	0.0833209	0.825428
AF	chr2	10223892	2.48373	0.00328296	BF	chr7	39670261	0.0833209	0.825428
AF	chr2	36627728	2.48373	0.00328296	BF	chr7	40141017	0.0833209	0.825428
AF	chr2	36627733	2.48373	0.00328296	BF	chr7	40548997	0.0833209	0.825428
AF	chr2	37852745	2.48373	0.00328296	BF	chr7	40867961	0.0833209	0.825428
AF	chr3	14848930	2.48373	0.00328296	BF	chr7	41019551	0.0833209	0.825428
AF	chr5	2744684	2.48297	0.00328876	BF	chr7	41187657	0.0833209	0.825428
AF	chr4	3506745	2.48133	0.00330118	BF	chr2	1275875	0.0866274	0.819167
AF	chr4	3506763	2.48133	0.00330118	BF	chr2	18513003	0.0866274	0.819167
AF	chr4	3527114	2.48133	0.00330118	BF	chr2	18769472	0.0866274	0.819167
AF	chr4	3527165	2.48133	0.00330118	BF	chr2	28661713	0.0866274	0.819167
AF	chr4	4078597	2.48133	0.00330118	BF	chr3	13329550	0.0866274	0.819167
AF	chr4	4078648	2.48133	0.00330118	BF	chr5	6034754	0.0866274	0.819167
AF	chr6	42160240	2.48133	0.00330118	BF	chr7	13139556	0.0866274	0.819167
AF	chr6	42160251	2.48133	0.00330118	BF	chr7	29526629	0.0866274	0.819167
AF	chr7	38132616	2.47723	0.00333253	BF	chr1	1015065	0.089384	0.813984
AF	chr4	3557533	2.47476	0.00335151	BF	chr1	7697698	0.089384	0.813984
AF	chr4	5064776	2.47476	0.00335151	BF	chr1	7984970	0.089384	0.813984
AF	chr4	5083912	2.47476	0.00335151	BF	chr1	8138309	0.089384	0.813984
AF	chr4	5083951	2.47476	0.00335151	BF	chr1	24527150	0.089384	0.813984
AF	chr4	5508401	2.47476	0.00335151	BF	chr2	2564355	0.089384	0.813984
AF	chr4	5915526	2.47476	0.00335151	BF	chr2	3406411	0.089384	0.813984
AF	chr4	2210890	2.47446	0.00335384	BF	chr2	3768572	0.089384	0.813984
AF	chr4	2816164	2.47446	0.00335384	BF	chr2	18769486	0.089384	0.813984
AF	chr4	2980638	2.47446	0.00335384	BF	chr2	37445667	0.089384	0.813984
AF	chr4	2980658	2.47446	0.00335384	BF	chr3	15942448	0.089384	0.813984
AF	chr4	4477098	2.47446	0.00335384	BF	chr3	27500653	0.089384	0.813984
AF	chr4	4477106	2.47446	0.00335384	BF	chr3	29465902	0.089384	0.813984
AF	chr4	7225671	2.47279	0.00336676	BF	chr3	42737338	0.089384	0.813984
AF	chr4	13211544	2.47279	0.00336676	BF	chr4	1438256	0.089384	0.813984
AF	chr4	4262004	2.47188	0.00337382	BF	chr4	1940587	0.089384	0.813984
AF	chr4	4445677	2.47188	0.00337382	BF	chr4	2390051	0.089384	0.813984
AF	chr4	4445881	2.47188	0.00337382	BF	chr4	3500273	0.089384	0.813984
AF	chr4	4838143	2.47188	0.00337382	BF	chr4	3513115	0.089384	0.813984
AF	chr3	29957611	2.47069	0.00338303	BF	chr4	6138542	0.089384	0.813984
AF	chr4	3485922	2.47069	0.00338303	BF	chr4	6138552	0.089384	0.813984
AF	chr4	3513030	2.47069	0.00338303	BF	chr4	6676180	0.089384	0.813984
AF	chr4	3597720	2.47069	0.00338303	BF	chr4	16396207	0.089384	0.813984
AF	chr4	3709117	2.47069	0.00338303	BF	chr4	22908248	0.089384	0.813984
AF	chr4	3982046	2.47069	0.00338303	BF	chr4	33228385	0.089384	0.813984
AF	chr4	4186378	2.47069	0.00338303	BF	chr5	4077733	0.089384	0.813984
AF	chr4	4355243	2.47069	0.00338303	BF	chr5	4083565	0.089384	0.813984
AF	chr4	5698726	2.47069	0.00338303	BF	chr5	4086600	0.089384	0.813984
AF	chr1	11508900	2.47066	0.00338329	BF	chr5	4086649	0.089384	0.813984
AF	chr5	5094436	2.47052	0.00338439	BF	chr5	4645733	0.089384	0.813984
AF	chr5	7752593	2.47052	0.00338439	BF	chr5	12833395	0.089384	0.813984
AF	chr3	35872550	2.47008	0.00338785	BF	chr5	20552722	0.089384	0.813984
AF	chr4	29083114	2.47008	0.00338785	BF	chr5	22486493	0.089384	0.813984
AF	chr1	6353936	2.46999	0.00338854	BF	chr5	40540974	0.089384	0.813984
AF	chr6	17903698	2.46999	0.00338854	BF	chr6	33344368	0.089384	0.813984
AF	chr4	4076360	2.46929	0.00339397	BF	chr6	33402106	0.089384	0.813984
AF	chr4	9014647	2.46929	0.00339397	BF	chr6	33402158	0.089384	0.813984
AF	chr4	9014678	2.46929	0.00339397	BF	chr7	32596836	0.089384	0.813984
AF	chr4	9014708	2.46929	0.00339397	BF	chr7	32978613	0.089384	0.813984
AF	chr4	10120750	2.46929	0.00339397	BF	chr7	32978619	0.089384	0.813984
AF	chr4	288579	2.46915	0.00339507	BF	chr7	35874743	0.089384	0.813984
AF	chr5	7068923	2.46915	0.00339507	BF	chr7	35874748	0.089384	0.813984
AF	chr5	7068932	2.46915	0.00339507	BF	chr7	39012675	0.089384	0.813984
AF	chr2	36249180	2.46871	0.00339854	BF	chr1	8417188	0.0962309	0.801252
AF	chr1	26349334	2.46862	0.00339923	BF	chr2	11610295	0.0962309	0.801252
AF	chr5	4988900	2.46862	0.00339923	BF	chr2	17512833	0.0962309	0.801252
AF	chr5	5261762	2.46862	0.00339923	BF	chr2	17582221	0.0962309	0.801252
AF	chr5	6213565	2.46862	0.00339923	BF	chr2	31816592	0.0962309	0.801252
AF	chr7	3761819	2.46862	0.00339923	BF	chr3	10089674	0.0962309	0.801252
AF	chr2	30213802	2.46791	0.00340475	BF	chr3	11962035	0.0962309	0.801252
AF	chr3	26802935	2.46791	0.00340475	BF	chr3	23672523	0.0962309	0.801252
AF	chr3	33360892	2.46791	0.00340475	BF	chr3	31117099	0.0962309	0.801252
AF	chr2	2009973	2.46655	0.0034155	BF	chr3	31436584	0.0962309	0.801252
AF	chr2	2009982	2.46655	0.0034155	BF	chr3	35796601	0.0962309	0.801252
AF	chr2	3586002	2.46655	0.0034155	BF	chr5	4873350	0.0962309	0.801252
AF	chr3	26129179	2.46655	0.0034155	BF	chr5	7134542	0.0962309	0.801252
AF	chr3	26129186	2.46655	0.0034155	BF	chr6	1535727	0.0962309	0.801252
AF	chr3	26129214	2.46655	0.0034155	BF	chr6	33422851	0.0962309	0.801252
AF	chr3	39664625	2.46655	0.0034155	BF	chr7	16655761	0.0962309	0.801252
AF	chr4	10287858	2.46655	0.0034155	BF	chr7	25996763	0.0962309	0.801252
AF	chr4	26647922	2.46655	0.0034155	BF	chr7	25996764	0.0962309	0.801252
AF	chr5	186434	2.46655	0.0034155	BF	chr7	37744014	0.0962309	0.801252
AF	chr5	3050668	2.46655	0.0034155	BF	chr7	38955638	0.0962309	0.801252
AF	chr6	13748717	2.46655	0.0034155	BF	chr7	38955645	0.0962309	0.801252
AF	chr6	24937102	2.46655	0.0034155	BF	chr7	38955661	0.0962309	0.801252
AF	chr6	27268548	2.46655	0.0034155	BF	chr7	39574748	0.0962309	0.801252
AF	chr6	27268549	2.46655	0.0034155	BF	chr2	17476823	0.104013	0.787022
AF	chr4	8464224	2.46314	0.00344243	BF	chr3	13857406	0.104013	0.787022
AF	chr4	10288203	2.46314	0.00344243	BF	chr4	4877147	0.104013	0.787022
AF	chr3	28587827	2.46246	0.00344776	BF	chr4	5278492	0.104013	0.787022
AF	chr5	4987227	2.46246	0.00344776	BF	chr4	7623705	0.104013	0.787022
AF	chr5	5281761	2.46246	0.00344776	BF	chr4	27434556	0.104013	0.787022
AF	chr5	7292150	2.46246	0.00344776	BF	chr5	4077667	0.104013	0.787022
AF	chr5	8470226	2.46246	0.00344776	BF	chr5	4484400	0.104013	0.787022
AF	chr5	10062170	2.46246	0.00344776	BF	chr5	40724345	0.104013	0.787022
AF	chr3	35146479	2.46039	0.00346426	BF	chr6	33422907	0.104013	0.787022
AF	chr6	27453144	2.46039	0.00346426	BF	chr7	25233057	0.104013	0.787022
AF	chr3	23841968	2.45909	0.00347468	BF	chr7	31161461	0.104013	0.787022
AF	chr4	6721646	2.45909	0.00347468	BF	chr7	31161475	0.104013	0.787022
AF	chr6	335873	2.45893	0.00347592	BF	chr7	31161500	0.104013	0.787022
AF	chr7	40549246	2.45893	0.00347592	BF	chr7	39820010	0.104013	0.787022
AF	chr7	40549282	2.45893	0.00347592	BF	chr2	22041245	0.107781	0.780224
AF	chr3	25656889	2.45871	0.00347768	BF	chr2	22041253	0.107781	0.780224
AF	chr3	25656890	2.45871	0.00347768	BF	chr3	25977499	0.107781	0.780224
AF	chr3	37752951	2.45871	0.00347768	BF	chr4	2015528	0.107781	0.780224
AF	chr5	15362933	2.45871	0.00347768	BF	chr4	23765885	0.107781	0.780224
AF	chr6	38672391	2.45871	0.00347768	BF	chr7	41151186	0.107781	0.780224
AF	chr1	12827974	2.45861	0.00347845	BF	chr1	5322843	0.112922	0.771043
AF	chr5	10553345	2.45861	0.00347845	BF	chr1	10193748	0.112922	0.771043
AF	chr5	38579310	2.45861	0.00347845	BF	chr2	17512829	0.112922	0.771043
AF	chr6	26362339	2.45645	0.0034958	BF	chr3	28425400	0.112922	0.771043
AF	chr3	35142219	2.45581	0.00350099	BF	chr3	28425409	0.112922	0.771043
AF	chr4	5038000	2.45027	0.00354596	BF	chr3	33458090	0.112922	0.771043
AF	chr4	5137341	2.45027	0.00354596	BF	chr5	5271485	0.112922	0.771043
AF	chr4	13006535	2.44678	0.00357456	BF	chr6	1652985	0.112922	0.771043
AF	chr4	34481994	2.44678	0.00357456	BF	chr6	10633850	0.112922	0.771043
AF	chr4	2817849	2.4466	0.00357601	BF	chr7	39052190	0.112922	0.771043
AF	chr2	40237013	2.44651	0.0035768	BF	chr2	31113201	0.121887	0.755289
AF	chr4	22817264	2.44569	0.00358351	BF	chr4	6434188	0.121887	0.755289
AF	chr5	1566953	2.44569	0.00358351	BF	chr7	33547798	0.121887	0.755289
AF	chr2	36772307	2.44562	0.00358413	BF	chr7	40959651	0.121887	0.755289
AF	chr2	36772360	2.44562	0.00358413	BF	chr1	19794978	0.123203	0.753004
AF	chr2	36772372	2.44562	0.00358413	BF	chr2	1895040	0.123203	0.753004
AF	chr5	1031486	2.44562	0.00358413	BF	chr2	14828789	0.123203	0.753004
AF	chr5	2650020	2.44562	0.00358413	BF	chr3	5976004	0.123203	0.753004
AF	chr5	3068459	2.44562	0.00358413	BF	chr3	30886336	0.123203	0.753004
AF	chr5	3068461	2.44562	0.00358413	BF	chr4	2278016	0.123203	0.753004
AF	chr5	3068472	2.44562	0.00358413	BF	chr4	11206019	0.123203	0.753004
AF	chr5	3068474	2.44562	0.00358413	BF	chr5	27824958	0.123203	0.753004
AF	chr5	3068495	2.44562	0.00358413	BF	chr5	35667276	0.123203	0.753004
AF	chr5	14364792	2.44562	0.00358413	BF	chr5	35667310	0.123203	0.753004
AF	chr3	43538280	2.44517	0.00358782	BF	chr5	35667311	0.123203	0.753004
AF	chr4	6845937	2.44517	0.00358782	BF	chr7	14812598	0.123203	0.753004
AF	chr4	8704033	2.4438	0.00359914	BF	chr7	38720093	0.123203	0.753004
AF	chr1	3256148	2.4437	0.00359998	BF	chr7	39052170	0.123203	0.753004
AF	chr2	6864168	2.4437	0.00359998	BF	chr1	854194	0.131057	0.739509
AF	chr3	30881499	2.4437	0.00359998	BF	chr1	854227	0.131057	0.739509
AF	chr4	3976679	2.4437	0.00359998	BF	chr1	854254	0.131057	0.739509
AF	chr4	4933969	2.4437	0.00359998	BF	chr1	1255375	0.131057	0.739509
AF	chr5	1049428	2.4437	0.00359998	BF	chr1	2466050	0.131057	0.739509
AF	chr6	35340352	2.4437	0.00359998	BF	chr1	9207837	0.131057	0.739509
AF	chr1	5451855	2.43992	0.00363143	BF	chr1	9216628	0.131057	0.739509
AF	chr5	8867390	2.43992	0.00363143	BF	chr1	9800827	0.131057	0.739509
AF	chr6	28491543	2.43992	0.00363143	BF	chr1	9800836	0.131057	0.739509
AF	chr7	38721525	2.43992	0.00363143	BF	chr1	31904505	0.131057	0.739509
AF	chr3	41796213	2.43982	0.00363231	BF	chr2	738775	0.131057	0.739509
AF	chr5	4375748	2.43954	0.00363465	BF	chr2	1307309	0.131057	0.739509
AF	chr4	4877138	2.43931	0.00363653	BF	chr2	1456150	0.131057	0.739509
AF	chr1	18921869	2.43756	0.00365123	BF	chr2	1484874	0.131057	0.739509
AF	chr4	7248735	2.43756	0.00365123	BF	chr2	1982071	0.131057	0.739509
AF	chr5	14241496	2.43756	0.00365123	BF	chr2	2847967	0.131057	0.739509
AF	chr6	4564585	2.43756	0.00365123	BF	chr2	4322173	0.131057	0.739509
AF	chr6	11791083	2.43756	0.00365123	BF	chr2	4322218	0.131057	0.739509
AF	chr6	24211063	2.43756	0.00365123	BF	chr2	4406486	0.131057	0.739509
AF	chr6	27150231	2.43756	0.00365123	BF	chr2	4544722	0.131057	0.739509
AF	chr6	37383689	2.43756	0.00365123	BF	chr2	4570868	0.131057	0.739509
AF	chr4	25582563	2.43664	0.003659	BF	chr2	4577890	0.131057	0.739509
AF	chr6	29004884	2.43273	0.00369206	BF	chr2	4597809	0.131057	0.739509
AF	chr6	28582819	2.4326	0.00369314	BF	chr2	4597819	0.131057	0.739509
AF	chr4	8430702	2.43238	0.00369501	BF	chr2	11980901	0.131057	0.739509
AF	chr6	28234947	2.43238	0.00369501	BF	chr2	14195051	0.131057	0.739509
AF	chr4	32692304	2.43229	0.00369582	BF	chr2	16785255	0.131057	0.739509
AF	chr5	38225138	2.43229	0.00369582	BF	chr2	16785267	0.131057	0.739509
AF	chr6	703398	2.43229	0.00369582	BF	chr2	20938250	0.131057	0.739509
AF	chr4	6136977	2.43136	0.0037037	BF	chr2	31843283	0.131057	0.739509
AF	chr4	2821204	2.43124	0.00370478	BF	chr3	5976074	0.131057	0.739509
AF	chr3	30155339	2.43102	0.00370666	BF	chr3	11512870	0.131057	0.739509
AF	chr2	7190179	2.43092	0.00370748	BF	chr3	30110929	0.131057	0.739509
AF	chr2	29251037	2.43092	0.00370748	BF	chr3	31906059	0.131057	0.739509
AF	chr5	3414943	2.43092	0.00370748	BF	chr3	32206110	0.131057	0.739509
AF	chr5	6713676	2.43092	0.00370748	BF	chr3	37193303	0.131057	0.739509
AF	chr5	9506525	2.43092	0.00370748	BF	chr3	41870606	0.131057	0.739509
AF	chr5	11646176	2.43092	0.00370748	BF	chr4	1078085	0.131057	0.739509
AF	chr7	36138529	2.43092	0.00370748	BF	chr4	1410382	0.131057	0.739509
AF	chr6	24976522	2.43013	0.00371425	BF	chr4	1410428	0.131057	0.739509
AF	chr3	9061301	2.42876	0.00372596	BF	chr4	1918830	0.131057	0.739509
AF	chr3	9061314	2.42876	0.00372596	BF	chr4	2069394	0.131057	0.739509
AF	chr3	22287440	2.42876	0.00372596	BF	chr4	2147498	0.131057	0.739509
AF	chr3	27983407	2.42876	0.00372596	BF	chr4	2687016	0.131057	0.739509
AF	chr3	27983430	2.42876	0.00372596	BF	chr4	2787991	0.131057	0.739509
AF	chr3	29706002	2.42876	0.00372596	BF	chr4	6184179	0.131057	0.739509
AF	chr3	32321666	2.42876	0.00372596	BF	chr4	6225477	0.131057	0.739509
AF	chr3	34462093	2.42876	0.00372596	BF	chr4	7493036	0.131057	0.739509
AF	chr3	34655002	2.42876	0.00372596	BF	chr4	7493042	0.131057	0.739509
AF	chr3	35313313	2.42876	0.00372596	BF	chr4	16529656	0.131057	0.739509
AF	chr3	35313336	2.42876	0.00372596	BF	chr4	25417275	0.131057	0.739509
AF	chr3	35313370	2.42876	0.00372596	BF	chr4	25545963	0.131057	0.739509
AF	chr3	39300490	2.42876	0.00372596	BF	chr4	26720162	0.131057	0.739509
AF	chr3	43471151	2.42876	0.00372596	BF	chr4	28524034	0.131057	0.739509
AF	chr4	5265559	2.42876	0.00372596	BF	chr4	34446724	0.131057	0.739509
AF	chr4	6157113	2.42876	0.00372596	BF	chr5	3387483	0.131057	0.739509
AF	chr5	2761051	2.42876	0.00372596	BF	chr5	4661130	0.131057	0.739509
AF	chr5	793897	2.42864	0.00372698	BF	chr5	5145617	0.131057	0.739509
AF	chr4	7476684	2.42647	0.00374565	BF	chr5	5346894	0.131057	0.739509
AF	chr3	29253327	2.42628	0.0037473	BF	chr5	5401080	0.131057	0.739509
AF	chr2	7569614	2.42539	0.00375502	BF	chr5	6290018	0.131057	0.739509
AF	chr1	2433456	2.42531	0.00375567	BF	chr5	8046727	0.131057	0.739509
AF	chr5	14797443	2.42531	0.00375567	BF	chr5	9454664	0.131057	0.739509
AF	chr5	30564133	2.42531	0.00375567	BF	chr5	9931064	0.131057	0.739509
AF	chr4	10021669	2.42487	0.00375954	BF	chr5	11818133	0.131057	0.739509
AF	chr4	10021701	2.42487	0.00375954	BF	chr5	11818177	0.131057	0.739509
AF	chr6	25290130	2.42487	0.00375954	BF	chr5	12836057	0.131057	0.739509
AF	chr1	23140655	2.42477	0.00376037	BF	chr5	18060796	0.131057	0.739509
AF	chr1	24327244	2.42477	0.00376037	BF	chr5	18060797	0.131057	0.739509
AF	chr4	172636	2.42477	0.00376037	BF	chr5	20545678	0.131057	0.739509
AF	chr5	493584	2.42477	0.00376037	BF	chr6	449028	0.131057	0.739509
AF	chr5	16160564	2.42477	0.00376037	BF	chr6	622887	0.131057	0.739509
AF	chr3	2459990	2.4234	0.00377227	BF	chr6	622914	0.131057	0.739509
AF	chr3	2460002	2.4234	0.00377227	BF	chr6	2097923	0.131057	0.739509
AF	chr3	22047399	2.4234	0.00377227	BF	chr6	18675866	0.131057	0.739509
AF	chr3	27256634	2.4234	0.00377227	BF	chr6	33280928	0.131057	0.739509
AF	chr3	27256658	2.4234	0.00377227	BF	chr6	33399545	0.131057	0.739509
AF	chr3	27256666	2.4234	0.00377227	BF	chr6	34797683	0.131057	0.739509
AF	chr3	27256679	2.4234	0.00377227	BF	chr7	14028275	0.131057	0.739509
AF	chr3	38389529	2.4234	0.00377227	BF	chr7	25499404	0.131057	0.739509
AF	chr4	1465491	2.4234	0.00377227	BF	chr7	26003417	0.131057	0.739509
AF	chr4	1465497	2.4234	0.00377227	BF	chr7	26003419	0.131057	0.739509
AF	chr6	24885681	2.4234	0.00377227	BF	chr7	30060119	0.131057	0.739509
AF	chr6	25314866	2.4234	0.00377227	BF	chr7	30060518	0.131057	0.739509
AF	chr7	14177733	2.4234	0.00377227	BF	chr7	30209530	0.131057	0.739509
AF	chr7	14177742	2.4234	0.00377227	BF	chr7	30973615	0.131057	0.739509
AF	chr7	31499855	2.4234	0.00377227	BF	chr7	31875394	0.131057	0.739509
AF	chr2	33654537	2.42261	0.00377911	BF	chr7	31875410	0.131057	0.739509
AF	chr3	36198422	2.42261	0.00377911	BF	chr7	33591102	0.131057	0.739509
AF	chr4	7063165	2.42261	0.00377911	BF	chr7	33998425	0.131057	0.739509
AF	chr4	7063171	2.42261	0.00377911	BF	chr7	33999090	0.131057	0.739509
AF	chr4	7258997	2.42261	0.00377911	BF	chr7	34116536	0.131057	0.739509
AF	chr4	11147912	2.42261	0.00377911	BF	chr7	37684897	0.131057	0.739509
AF	chr5	410750	2.42261	0.00377911	BF	chr7	37685206	0.131057	0.739509
AF	chr5	3987334	2.42261	0.00377911	BF	chr7	38020936	0.131057	0.739509
AF	chr5	23359837	2.42261	0.00377911	BF	chr7	38130300	0.131057	0.739509
AF	chr5	23359854	2.42261	0.00377911	BF	chr7	38130510	0.131057	0.739509
AF	chr6	24388483	2.42261	0.00377911	BF	chr7	38214692	0.131057	0.739509
AF	chr4	4569550	2.4167	0.0038309	BF	chr7	38647236	0.131057	0.739509
AF	chr4	5043664	2.4167	0.0038309	BF	chr7	38721413	0.131057	0.739509
AF	chr4	5064715	2.4167	0.0038309	BF	chr7	39033981	0.131057	0.739509
AF	chr4	5086213	2.4167	0.0038309	BF	chr7	39083559	0.131057	0.739509
AF	chr4	5152385	2.4167	0.0038309	BF	chr7	39491360	0.131057	0.739509
AF	chr4	5156067	2.4167	0.0038309	BF	chr7	39491361	0.131057	0.739509
AF	chr4	5189315	2.4167	0.0038309	BF	chr7	39704308	0.131057	0.739509
AF	chr4	5189358	2.4167	0.0038309	BF	chr7	39772998	0.131057	0.739509
AF	chr4	16558478	2.41597	0.0038373	BF	chr7	39787244	0.131057	0.739509
AF	chr4	16558495	2.41597	0.0038373	BF	chr7	39809517	0.131057	0.739509
AF	chr4	16558502	2.41597	0.0038373	BF	chr7	40335546	0.131057	0.739509
AF	chr3	32696684	2.4158	0.00383885	BF	chr7	40562347	0.131057	0.739509
AF	chr3	32696689	2.4158	0.00383885	BF	chr7	40684616	0.131057	0.739509
AF	chr4	21803052	2.41559	0.00384069	BF	chr7	40904429	0.131057	0.739509
AF	chr5	7010256	2.41489	0.0038469	BF	chr7	41010092	0.131057	0.739509
AF	chr6	29555580	2.41489	0.0038469	BF	chr2	20967625	0.135176	0.732528
AF	chr7	3775215	2.41489	0.0038469	BF	chr3	20782392	0.135176	0.732528
AF	chr4	1394380	2.41361	0.00385827	BF	chr3	36198429	0.135176	0.732528
AF	chr5	15239967	2.41361	0.00385827	BF	chr4	25392060	0.135176	0.732528
AF	chr6	31439825	2.41361	0.00385827	BF	chr5	18490230	0.135176	0.732528
AF	chr6	31439839	2.41361	0.00385827	BF	chr5	32425332	0.135176	0.732528
AF	chr3	40158122	2.4135	0.0038592	BF	chr2	12734653	0.13943	0.725387
AF	chr5	10303212	2.4135	0.0038592	BF	chr3	12042838	0.13943	0.725387
AF	chr5	40542513	2.4135	0.0038592	BF	chr3	19488145	0.13943	0.725387
AF	chr6	7779256	2.41337	0.0038604	BF	chr5	4760580	0.13943	0.725387
AF	chr1	21532975	2.4129	0.00386457	BF	chr5	32583942	0.13943	0.725387
AF	chr3	2744555	2.4129	0.00386457	BF	chr6	1001446	0.13943	0.725387
AF	chr3	2744605	2.4129	0.00386457	BF	chr1	4437385	0.140642	0.723365
AF	chr3	35356676	2.4129	0.00386457	BF	chr1	6152498	0.140642	0.723365
AF	chr4	10008270	2.4129	0.00386457	BF	chr2	767870	0.140642	0.723365
AF	chr4	22969116	2.41236	0.0038694	BF	chr2	1290825	0.140642	0.723365
AF	chr4	22969151	2.41236	0.0038694	BF	chr2	1396245	0.140642	0.723365
AF	chr4	25945088	2.41236	0.0038694	BF	chr2	1582379	0.140642	0.723365
AF	chr4	29471765	2.41236	0.0038694	BF	chr2	3681484	0.140642	0.723365
AF	chr1	31175267	2.41224	0.00387043	BF	chr2	8757907	0.140642	0.723365
AF	chr3	40306031	2.41224	0.00387043	BF	chr2	37546422	0.140642	0.723365
AF	chr4	11603108	2.41224	0.00387043	BF	chr3	4116441	0.140642	0.723365
AF	chr4	25945037	2.41224	0.00387043	BF	chr3	18020470	0.140642	0.723365
AF	chr5	4979783	2.41224	0.00387043	BF	chr3	23954601	0.140642	0.723365
AF	chr5	4979785	2.41224	0.00387043	BF	chr3	30068731	0.140642	0.723365
AF	chr6	28932599	2.41224	0.00387043	BF	chr3	30597666	0.140642	0.723365
AF	chr6	29598470	2.41224	0.00387043	BF	chr3	30814577	0.140642	0.723365
AF	chr1	31175237	2.41214	0.00387136	BF	chr3	31142331	0.140642	0.723365
AF	chr1	30036964	2.41187	0.00387376	BF	chr3	31142332	0.140642	0.723365
AF	chr3	23199650	2.41187	0.00387376	BF	chr3	31893672	0.140642	0.723365
AF	chr3	23199658	2.41187	0.00387376	BF	chr3	38096297	0.140642	0.723365
AF	chr3	41681494	2.41187	0.00387376	BF	chr3	40952215	0.140642	0.723365
AF	chr3	41681503	2.41187	0.00387376	BF	chr4	1252847	0.140642	0.723365
AF	chr4	3029538	2.41187	0.00387376	BF	chr4	6804522	0.140642	0.723365
AF	chr4	3116199	2.41187	0.00387376	BF	chr4	23003022	0.140642	0.723365
AF	chr4	3116228	2.41187	0.00387376	BF	chr4	24395576	0.140642	0.723365
AF	chr4	3158541	2.41187	0.00387376	BF	chr5	4586946	0.140642	0.723365
AF	chr4	4405463	2.41187	0.00387376	BF	chr5	5676118	0.140642	0.723365
AF	chr4	4434645	2.41187	0.00387376	BF	chr5	10281841	0.140642	0.723365
AF	chr4	4445909	2.41187	0.00387376	BF	chr5	14004875	0.140642	0.723365
AF	chr4	4641678	2.41187	0.00387376	BF	chr5	33310268	0.140642	0.723365
AF	chr2	8871879	2.41125	0.00387929	BF	chr5	33310277	0.140642	0.723365
AF	chr3	30011381	2.41125	0.00387929	BF	chr5	33310280	0.140642	0.723365
AF	chr4	25584990	2.41125	0.00387929	BF	chr5	33310281	0.140642	0.723365
AF	chr5	2892934	2.41125	0.00387929	BF	chr5	33310300	0.140642	0.723365
AF	chr5	15239902	2.41125	0.00387929	BF	chr5	33310303	0.140642	0.723365
AF	chr6	21699549	2.41125	0.00387929	BF	chr5	33310312	0.140642	0.723365
AF	chr6	24832375	2.41125	0.00387929	BF	chr5	36872033	0.140642	0.723365
AF	chr3	34291584	2.40988	0.00389151	BF	chr5	37041415	0.140642	0.723365
AF	chr3	40013052	2.40988	0.00389151	BF	chr6	34201671	0.140642	0.723365
AF	chr3	42189490	2.40988	0.00389151	BF	chr7	28385966	0.140642	0.723365
AF	chr3	42639811	2.40988	0.00389151	BF	chr7	28385990	0.140642	0.723365
AF	chr3	42639820	2.40988	0.00389151	BF	chr7	29551136	0.140642	0.723365
AF	chr4	2087116	2.40988	0.00389151	BF	chr7	29814863	0.140642	0.723365
AF	chr4	2087144	2.40988	0.00389151	BF	chr7	40316369	0.140642	0.723365
AF	chr4	11620744	2.40988	0.00389151	BF	chr1	6763513	0.149265	0.709145
AF	chr4	13205773	2.40988	0.00389151	BF	chr1	7204782	0.149265	0.709145
AF	chr5	796067	2.40988	0.00389151	BF	chr1	7204787	0.149265	0.709145
AF	chr5	796080	2.40988	0.00389151	BF	chr3	24035314	0.149265	0.709145
AF	chr5	961645	2.40988	0.00389151	BF	chr3	25977521	0.149265	0.709145
AF	chr6	24937098	2.40988	0.00389151	BF	chr3	32201406	0.149265	0.709145
AF	chr6	26317686	2.40988	0.00389151	BF	chr5	4132228	0.149265	0.709145
AF	chr2	37500433	2.40609	0.00392562	BF	chr7	4299761	0.149265	0.709145
AF	chr4	22658044	2.40609	0.00392562	BF	chr2	31857479	0.151482	0.705535
AF	chr5	7511482	2.40609	0.00392562	BF	chr3	9033268	0.151482	0.705535
AF	chr1	13692054	2.40599	0.00392657	BF	chr3	15148392	0.151482	0.705535
AF	chr3	35356253	2.40599	0.00392657	BF	chr3	35771529	0.151482	0.705535
AF	chr5	12175236	2.40599	0.00392657	BF	chr4	27434510	0.151482	0.705535
AF	chr4	3800200	2.40446	0.00394044	BF	chr5	4086761	0.151482	0.705535
AF	chr3	12072622	2.40373	0.003947	BF	chr5	6034628	0.151482	0.705535
AF	chr3	36198449	2.40373	0.003947	BF	chr5	7134550	0.151482	0.705535
AF	chr4	12373392	2.40373	0.003947	BF	chr5	33483986	0.151482	0.705535
AF	chr5	2645981	2.40373	0.003947	BF	chr6	15542770	0.151482	0.705535
AF	chr5	15147606	2.40373	0.003947	BF	chr6	23707725	0.151482	0.705535
AF	chr6	33676047	2.40373	0.003947	BF	chr7	31499831	0.151482	0.705535
AF	chr7	40949132	2.40373	0.003947	BF	chr1	2507397	0.16382	0.685772
AF	chr3	22453452	2.39986	0.00398231	BF	chr4	2817904	0.16382	0.685772
AF	chr4	13119467	2.39569	0.00402078	BF	chr4	11206032	0.16382	0.685772
AF	chr4	3696176	2.37186	0.00424756	BF	chr5	1896494	0.16382	0.685772
AF	chr4	3696177	2.37186	0.00424756	BF	chr5	4087973	0.16382	0.685772
AF	chr4	3696178	2.37186	0.00424756	BF	chr5	4999849	0.16382	0.685772
AF	chr4	6285180	2.37186	0.00424756	BF	chr5	12120520	0.16382	0.685772
AF	chr4	6370659	2.37186	0.00424756	BF	chr7	3793992	0.16382	0.685772
AF	chr4	1749991	2.37166	0.0042495	BF	chr7	22915236	0.16382	0.685772
AF	chr4	3047862	2.37166	0.0042495	BF	chr7	30539371	0.16382	0.685772
AF	chr4	3303467	2.37166	0.0042495	BF	chr7	34956807	0.16382	0.685772
AF	chr4	3303470	2.37166	0.0042495	BF	chr1	10267924	0.166044	0.68227
AF	chr4	5726631	2.3711	0.00425502	BF	chr2	5225599	0.166044	0.68227
AF	chr4	13006528	2.3711	0.00425502	BF	chr2	9149547	0.166044	0.68227
AF	chr2	37853303	2.3705	0.00426086	BF	chr2	22041259	0.166044	0.68227
AF	chr4	8082233	2.3705	0.00426086	BF	chr4	18447402	0.166044	0.68227
AF	chr4	15224865	2.3705	0.00426086	BF	chr4	24548288	0.166044	0.68227
AF	chr4	25347539	2.3705	0.00426086	BF	chr7	36809350	0.166044	0.68227
AF	chr5	1493161	2.37043	0.00426154	BF	chr1	7098224	0.177972	0.663786
AF	chr5	9052358	2.37043	0.00426154	BF	chr2	16434898	0.177972	0.663786
AF	chr6	31713202	2.37043	0.00426154	BF	chr3	26699969	0.177972	0.663786
AF	chr4	2602408	2.37019	0.00426393	BF	chr3	26699974	0.177972	0.663786
AF	chr5	2372088	2.37019	0.00426393	BF	chr3	32315443	0.177972	0.663786
AF	chr5	2394944	2.37019	0.00426393	BF	chr3	32315458	0.177972	0.663786
AF	chr5	2649951	2.37019	0.00426393	BF	chr3	43113284	0.177972	0.663786
AF	chr6	4352971	2.37019	0.00426393	BF	chr4	818684	0.177972	0.663786
AF	chr2	2245046	2.36859	0.00427967	BF	chr5	12175244	0.177972	0.663786
AF	chr2	7170570	2.36859	0.00427967	BF	chr5	29704032	0.177972	0.663786
AF	chr2	9263191	2.36859	0.00427967	BF	chr5	37685740	0.177972	0.663786
AF	chr2	16327574	2.36859	0.00427967	BF	chr6	4856278	0.177972	0.663786
AF	chr2	18133245	2.36859	0.00427967	BF	chr7	24687616	0.177972	0.663786
AF	chr2	21589652	2.36859	0.00427967	BF	chr7	35676775	0.177972	0.663786
AF	chr3	6919175	2.36859	0.00427967	BF	chr1	4708878	0.180858	0.65939
AF	chr3	10613216	2.36859	0.00427967	BF	chr1	4991668	0.180858	0.65939
AF	chr3	31269493	2.36859	0.00427967	BF	chr1	5250579	0.180858	0.65939
AF	chr3	42267177	2.36859	0.00427967	BF	chr1	8436868	0.180858	0.65939
AF	chr4	3046184	2.36859	0.00427967	BF	chr1	8732071	0.180858	0.65939
AF	chr4	5064686	2.36859	0.00427967	BF	chr1	9220521	0.180858	0.65939
AF	chr4	7188182	2.36859	0.00427967	BF	chr1	9955787	0.180858	0.65939
AF	chr4	7188204	2.36859	0.00427967	BF	chr1	26819010	0.180858	0.65939
AF	chr4	7188209	2.36859	0.00427967	BF	chr1	30094511	0.180858	0.65939
AF	chr4	28465669	2.36859	0.00427967	BF	chr1	30507043	0.180858	0.65939
AF	chr4	28465673	2.36859	0.00427967	BF	chr2	1965266	0.180858	0.65939
AF	chr5	412518	2.36859	0.00427967	BF	chr2	1965273	0.180858	0.65939
AF	chr5	1486175	2.36859	0.00427967	BF	chr2	2047995	0.180858	0.65939
AF	chr5	2390726	2.36859	0.00427967	BF	chr2	2417507	0.180858	0.65939
AF	chr5	4088126	2.36859	0.00427967	BF	chr2	3708073	0.180858	0.65939
AF	chr5	12349581	2.36859	0.00427967	BF	chr2	4048103	0.180858	0.65939
AF	chr6	9929815	2.36859	0.00427967	BF	chr2	4210380	0.180858	0.65939
AF	chr6	29132846	2.36859	0.00427967	BF	chr2	4406388	0.180858	0.65939
AF	chr6	31782750	2.36859	0.00427967	BF	chr2	5122673	0.180858	0.65939
AF	chr7	31499886	2.36859	0.00427967	BF	chr2	5130757	0.180858	0.65939
AF	chr7	33384580	2.36859	0.00427967	BF	chr2	7558985	0.180858	0.65939
AF	chr7	33384610	2.36859	0.00427967	BF	chr2	11980958	0.180858	0.65939
AF	chr1	9171245	2.3682	0.00428349	BF	chr2	12043662	0.180858	0.65939
AF	chr2	14451378	2.3682	0.00428349	BF	chr2	12381557	0.180858	0.65939
AF	chr2	27605642	2.3682	0.00428349	BF	chr2	12391066	0.180858	0.65939
AF	chr2	31717466	2.3682	0.00428349	BF	chr2	12569736	0.180858	0.65939
AF	chr3	10907279	2.3682	0.00428349	BF	chr2	14518026	0.180858	0.65939
AF	chr3	30825140	2.3682	0.00428349	BF	chr2	18442802	0.180858	0.65939
AF	chr3	31416745	2.3682	0.00428349	BF	chr2	18442807	0.180858	0.65939
AF	chr3	41949264	2.3682	0.00428349	BF	chr2	37966898	0.180858	0.65939
AF	chr4	5042533	2.3682	0.00428349	BF	chr2	38246646	0.180858	0.65939
AF	chr4	7528390	2.3682	0.00428349	BF	chr2	39447359	0.180858	0.65939
AF	chr4	8192634	2.3682	0.00428349	BF	chr3	2391663	0.180858	0.65939
AF	chr4	27146831	2.3682	0.00428349	BF	chr3	21069452	0.180858	0.65939
AF	chr5	1486177	2.3682	0.00428349	BF	chr3	32865365	0.180858	0.65939
AF	chr5	2851829	2.3682	0.00428349	BF	chr3	34064766	0.180858	0.65939
AF	chr5	2851862	2.3682	0.00428349	BF	chr3	34442404	0.180858	0.65939
AF	chr5	3190285	2.3682	0.00428349	BF	chr3	35625008	0.180858	0.65939
AF	chr4	9320109	2.36405	0.00432467	BF	chr3	43490563	0.180858	0.65939
AF	chr6	6304255	2.36389	0.00432623	BF	chr4	2087650	0.180858	0.65939
AF	chr7	40685256	2.36389	0.00432623	BF	chr4	2210847	0.180858	0.65939
AF	chr7	40685296	2.36389	0.00432623	BF	chr4	2523827	0.180858	0.65939
AF	chr4	6497551	2.3616	0.00434906	BF	chr4	4539173	0.180858	0.65939
AF	chr4	11879934	2.36115	0.0043536	BF	chr4	5874351	0.180858	0.65939
AF	chr4	18231461	2.36115	0.0043536	BF	chr4	10548968	0.180858	0.65939
AF	chr3	13468500	2.35972	0.00436801	BF	chr4	10548969	0.180858	0.65939
AF	chr3	13468501	2.35972	0.00436801	BF	chr4	16527284	0.180858	0.65939
AF	chr3	13468502	2.35972	0.00436801	BF	chr4	16595667	0.180858	0.65939
AF	chr4	1106098	2.35067	0.00445992	BF	chr4	24781839	0.180858	0.65939
AF	chr3	31862517	2.35	0.00446682	BF	chr4	24781844	0.180858	0.65939
AF	chr4	17332830	2.35	0.00446682	BF	chr4	24933265	0.180858	0.65939
AF	chr5	5378778	2.35	0.00446682	BF	chr4	33669575	0.180858	0.65939
AF	chr2	7389418	2.34992	0.00446765	BF	chr4	34769204	0.180858	0.65939
AF	chr2	8040367	2.34992	0.00446765	BF	chr4	34769229	0.180858	0.65939
AF	chr2	8040369	2.34992	0.00446765	BF	chr5	3787723	0.180858	0.65939
AF	chr4	372908	2.34992	0.00446765	BF	chr5	4071775	0.180858	0.65939
AF	chr4	372930	2.34992	0.00446765	BF	chr5	6791778	0.180858	0.65939
AF	chr6	17671862	2.34992	0.00446765	BF	chr5	6844176	0.180858	0.65939
AF	chr7	4646587	2.34992	0.00446765	BF	chr5	14383803	0.180858	0.65939
AF	chr3	35510207	2.34924	0.00447463	BF	chr5	15170387	0.180858	0.65939
AF	chr3	10064562	2.34793	0.00448813	BF	chr5	31807809	0.180858	0.65939
AF	chr3	15548673	2.34793	0.00448813	BF	chr6	2210963	0.180858	0.65939
AF	chr3	34676353	2.34793	0.00448813	BF	chr6	8255760	0.180858	0.65939
AF	chr3	36813519	2.34793	0.00448813	BF	chr6	38112090	0.180858	0.65939
AF	chr4	8174527	2.34793	0.00448813	BF	chr6	38299644	0.180858	0.65939
AF	chr5	435197	2.34793	0.00448813	BF	chr7	7088794	0.180858	0.65939
AF	chr5	6188364	2.34793	0.00448813	BF	chr7	7088795	0.180858	0.65939
AF	chr2	31071401	2.34627	0.00450533	BF	chr7	7088828	0.180858	0.65939
AF	chr2	31071411	2.34627	0.00450533	BF	chr7	7088833	0.180858	0.65939
AF	chr4	29321443	2.34627	0.00450533	BF	chr7	7088845	0.180858	0.65939
AF	chr5	36741725	2.34627	0.00450533	BF	chr7	7088859	0.180858	0.65939
AF	chr6	18064028	2.34627	0.00450533	BF	chr7	26596073	0.180858	0.65939
AF	chr7	25049173	2.34627	0.00450533	BF	chr7	26596077	0.180858	0.65939
AF	chr4	6721620	2.34565	0.00451181	BF	chr7	27513132	0.180858	0.65939
AF	chr7	38033655	2.34565	0.00451181	BF	chr7	29378228	0.180858	0.65939
AF	chr3	43631981	2.34564	0.00451187	BF	chr7	30106049	0.180858	0.65939
AF	chr2	13446865	2.34436	0.0045252	BF	chr7	30116709	0.180858	0.65939
AF	chr2	13446876	2.34436	0.0045252	BF	chr7	30116730	0.180858	0.65939
AF	chr2	13446883	2.34436	0.0045252	BF	chr7	30616099	0.180858	0.65939
AF	chr3	3497063	2.34436	0.0045252	BF	chr7	32186801	0.180858	0.65939
AF	chr3	3497080	2.34436	0.0045252	BF	chr7	33998346	0.180858	0.65939
AF	chr4	3011417	2.34436	0.0045252	BF	chr7	33998374	0.180858	0.65939
AF	chr4	33121939	2.34436	0.0045252	BF	chr7	37437726	0.180858	0.65939
AF	chr5	17039094	2.34436	0.0045252	BF	chr7	37515313	0.180858	0.65939
AF	chr6	12058364	2.34436	0.0045252	BF	chr7	37673628	0.180858	0.65939
AF	chr6	27336343	2.34436	0.0045252	BF	chr7	37815534	0.180858	0.65939
AF	chr7	3775233	2.34436	0.0045252	BF	chr7	39524408	0.180858	0.65939
AF	chr4	12621027	2.34304	0.00453904	BF	chr7	40430661	0.180858	0.65939
AF	chr6	35592867	2.34304	0.00453904	BF	chr7	40430674	0.180858	0.65939
AF	chr6	41249578	2.34304	0.00453904	BF	chr7	40437611	0.180858	0.65939
AF	chr4	4689587	2.34031	0.0045676	BF	chr7	40578891	0.180858	0.65939
AF	chr7	6475558	2.34031	0.0045676	BF	chr7	40870847	0.180858	0.65939
AF	chr1	29525818	2.34014	0.00456939	BF	chr7	41070898	0.180858	0.65939
AF	chr2	12325627	2.34014	0.00456939	BF	chr2	1052721	0.186304	0.651173
AF	chr2	12325628	2.34014	0.00456939	BF	chr2	39446755	0.186304	0.651173
AF	chr5	7394578	2.34014	0.00456939	BF	chr2	40210176	0.186304	0.651173
AF	chr6	19838192	2.34014	0.00456939	BF	chr7	40469178	0.186304	0.651173
AF	chr6	19838224	2.34014	0.00456939	BF	chr7	40469188	0.186304	0.651173
AF	chr6	22276998	2.34014	0.00456939	BF	chr1	6233780	0.193515	0.64045
AF	chr4	6986088	2.33952	0.00457591	BF	chr1	7740168	0.193515	0.64045
AF	chr4	24653383	2.33952	0.00457591	BF	chr1	7740169	0.193515	0.64045
AF	chr4	24653416	2.33952	0.00457591	BF	chr1	8144021	0.193515	0.64045
AF	chr1	22893321	2.33944	0.00457677	BF	chr1	8730288	0.193515	0.64045
AF	chr5	13219643	2.33944	0.00457677	BF	chr1	9216632	0.193515	0.64045
AF	chr7	39948614	2.33944	0.00457677	BF	chr2	761746	0.193515	0.64045
AF	chr1	5786607	2.33745	0.00459775	BF	chr2	1582374	0.193515	0.64045
AF	chr5	35607936	2.33745	0.00459775	BF	chr2	2228599	0.193515	0.64045
AF	chr4	6137031	2.33038	0.00467328	BF	chr2	2584757	0.193515	0.64045
AF	chr4	15792766	2.32943	0.00468354	BF	chr2	2886779	0.193515	0.64045
AF	chr5	5386479	2.32943	0.00468354	BF	chr2	2886780	0.193515	0.64045
AF	chr4	2190236	2.32879	0.00469043	BF	chr2	3384302	0.193515	0.64045
AF	chr4	4984582	2.32349	0.00474802	BF	chr2	4237121	0.193515	0.64045
AF	chr4	5211589	2.32349	0.00474802	BF	chr2	6105438	0.193515	0.64045
AF	chr4	5211624	2.32349	0.00474802	BF	chr2	12657794	0.193515	0.64045
AF	chr4	6029612	2.32349	0.00474802	BF	chr2	12657815	0.193515	0.64045
AF	chr4	6204260	2.32349	0.00474802	BF	chr2	12657824	0.193515	0.64045
AF	chr4	6304150	2.32349	0.00474802	BF	chr2	17623718	0.193515	0.64045
AF	chr4	15311413	2.32349	0.00474802	BF	chr2	31331929	0.193515	0.64045
AF	chr4	2217660	2.32323	0.00475085	BF	chr2	31604734	0.193515	0.64045
AF	chr4	4346329	2.32139	0.00477102	BF	chr2	39923954	0.193515	0.64045
AF	chr4	3465952	2.31974	0.0047892	BF	chr3	6300622	0.193515	0.64045
AF	chr4	3466122	2.31974	0.0047892	BF	chr3	9033281	0.193515	0.64045
AF	chr4	3501582	2.31974	0.0047892	BF	chr3	11603566	0.193515	0.64045
AF	chr4	3542660	2.31974	0.0047892	BF	chr3	11646430	0.193515	0.64045
AF	chr4	3546193	2.31974	0.0047892	BF	chr3	13138440	0.193515	0.64045
AF	chr4	3597912	2.31974	0.0047892	BF	chr3	28437726	0.193515	0.64045
AF	chr4	8195277	2.31974	0.0047892	BF	chr3	30147351	0.193515	0.64045
AF	chr4	9767473	2.31974	0.0047892	BF	chr3	32586281	0.193515	0.64045
AF	chr4	9767518	2.31974	0.0047892	BF	chr3	33227562	0.193515	0.64045
AF	chr4	9767533	2.31974	0.0047892	BF	chr3	35899514	0.193515	0.64045
AF	chr4	14569272	2.31974	0.0047892	BF	chr3	37262145	0.193515	0.64045
AF	chr5	38127397	2.3163	0.00482722	BF	chr3	37262150	0.193515	0.64045
AF	chr7	34573014	2.3163	0.00482722	BF	chr3	37262153	0.193515	0.64045
AF	chr4	5093189	2.31555	0.00483561	BF	chr3	42858560	0.193515	0.64045
AF	chr4	5194259	2.31555	0.00483561	BF	chr3	43531844	0.193515	0.64045
AF	chr4	5398434	2.31555	0.00483561	BF	chr3	43531845	0.193515	0.64045
AF	chr4	6161689	2.31555	0.00483561	BF	chr4	261704	0.193515	0.64045
AF	chr4	2207057	2.31525	0.00483895	BF	chr4	261710	0.193515	0.64045
AF	chr4	5153486	2.3144	0.0048484	BF	chr4	23003035	0.193515	0.64045
AF	chr4	5153500	2.3144	0.0048484	BF	chr4	24183244	0.193515	0.64045
AF	chr4	5726590	2.3144	0.0048484	BF	chr4	24632345	0.193515	0.64045
AF	chr4	25347637	2.31382	0.0048549	BF	chr5	1848110	0.193515	0.64045
AF	chr4	25347655	2.31382	0.0048549	BF	chr5	1848116	0.193515	0.64045
AF	chr5	1294675	2.31373	0.00485589	BF	chr5	2155719	0.193515	0.64045
AF	chr7	3471518	2.31373	0.00485589	BF	chr5	5065478	0.193515	0.64045
AF	chr2	31958774	2.31167	0.00487904	BF	chr5	5065479	0.193515	0.64045
AF	chr2	31995377	2.31167	0.00487904	BF	chr5	6463501	0.193515	0.64045
AF	chr3	32098677	2.31167	0.00487904	BF	chr5	8880599	0.193515	0.64045
AF	chr3	36267664	2.31167	0.00487904	BF	chr5	20552655	0.193515	0.64045
AF	chr3	37224398	2.31167	0.00487904	BF	chr5	27824864	0.193515	0.64045
AF	chr3	40477869	2.31167	0.00487904	BF	chr5	30636949	0.193515	0.64045
AF	chr3	40909646	2.31167	0.00487904	BF	chr5	33759415	0.193515	0.64045
AF	chr3	42223001	2.31167	0.00487904	BF	chr5	36218504	0.193515	0.64045
AF	chr4	6337110	2.31167	0.00487904	BF	chr6	1902293	0.193515	0.64045
AF	chr4	6337115	2.31167	0.00487904	BF	chr6	8100059	0.193515	0.64045
AF	chr4	12749801	2.31167	0.00487904	BF	chr6	9810068	0.193515	0.64045
AF	chr5	2580245	2.31167	0.00487904	BF	chr6	22992740	0.193515	0.64045
AF	chr5	8715649	2.31167	0.00487904	BF	chr6	22992749	0.193515	0.64045
AF	chr4	5683742	2.3115	0.00488091	BF	chr6	38340151	0.193515	0.64045
AF	chr2	21335433	2.31082	0.00488853	BF	chr7	3031827	0.193515	0.64045
AF	chr3	4166923	2.30752	0.00492585	BF	chr7	3536772	0.193515	0.64045
AF	chr6	11469985	2.30736	0.00492765	BF	chr7	23674818	0.193515	0.64045
AF	chr6	38672403	2.30678	0.00493426	BF	chr7	26861108	0.193515	0.64045
AF	chr6	27126358	2.30462	0.00495879	BF	chr7	30617217	0.193515	0.64045
AF	chr6	27126373	2.30462	0.00495879	BF	chr7	30675205	0.193515	0.64045
AF	chr7	28084202	2.30462	0.00495879	BF	chr7	32053475	0.193515	0.64045
AF	chr4	4970213	2.29416	0.00507972	BF	chr7	32488511	0.193515	0.64045
AF	chr1	26444487	2.29402	0.00508136	BF	chr7	32591680	0.193515	0.64045
AF	chr1	3357245	2.29349	0.00508756	BF	chr7	32592226	0.193515	0.64045
AF	chr1	25066957	2.29349	0.00508756	BF	chr7	32853584	0.193515	0.64045
AF	chr4	940078	2.29349	0.00508756	BF	chr7	33037267	0.193515	0.64045
AF	chr5	15182560	2.29349	0.00508756	BF	chr7	33037306	0.193515	0.64045
AF	chr5	40696792	2.29349	0.00508756	BF	chr7	34557389	0.193515	0.64045
AF	chr7	35617426	2.29349	0.00508756	BF	chr7	34698559	0.193515	0.64045
AF	chr3	32148411	2.29143	0.00511181	BF	chr7	35874903	0.193515	0.64045
AF	chr3	33999537	2.29143	0.00511181	BF	chr7	35874911	0.193515	0.64045
AF	chr3	34253386	2.29143	0.00511181	BF	chr7	39771841	0.193515	0.64045
AF	chr3	41273048	2.29143	0.00511181	BF	chr7	40533498	0.193515	0.64045
AF	chr3	42146000	2.29143	0.00511181	BF	chr1	5480765	0.194339	0.639236
AF	chr4	2027119	2.29143	0.00511181	BF	chr1	14172376	0.194339	0.639236
AF	chr4	4870663	2.29143	0.00511181	BF	chr2	20555559	0.194339	0.639236
AF	chr5	1211597	2.29143	0.00511181	BF	chr2	35110162	0.194339	0.639236
AF	chr5	5378796	2.29143	0.00511181	BF	chr3	6931045	0.194339	0.639236
AF	chr6	28007486	2.29143	0.00511181	BF	chr3	6931047	0.194339	0.639236
AF	chr6	31470410	2.29143	0.00511181	BF	chr3	19699175	0.194339	0.639236
AF	chr6	44197762	2.29143	0.00511181	BF	chr3	36342932	0.194339	0.639236
AF	chr4	2644619	2.28974	0.00513171	BF	chr4	31097750	0.194339	0.639236
AF	chr3	38468533	2.28625	0.00517309	BF	chr7	14174804	0.194339	0.639236
AF	chr4	4406102	2.28624	0.00517324	BF	chr7	23681527	0.194339	0.639236
AF	chr5	18791303	2.2858	0.0051785	BF	chr7	37655480	0.194339	0.639236
AF	chr7	35662393	2.28571	0.00517955	BF	chr1	6014449	0.207761	0.619783
AF	chr4	4981112	2.28369	0.00520362	BF	chr1	6493919	0.207761	0.619783
AF	chr4	10288182	2.28369	0.00520362	BF	chr1	9227166	0.207761	0.619783
AF	chr5	1137991	2.28364	0.00520423	BF	chr1	9227168	0.207761	0.619783
AF	chr5	5094431	2.28364	0.00520423	BF	chr1	10000276	0.207761	0.619783
AF	chr6	2034189	2.28364	0.00520423	BF	chr1	15643918	0.207761	0.619783
AF	chr1	31630224	2.28355	0.0052053	BF	chr2	6397869	0.207761	0.619783
AF	chr4	1875701	2.28355	0.0052053	BF	chr2	6397881	0.207761	0.619783
AF	chr7	29676388	2.28311	0.00521059	BF	chr2	12661415	0.207761	0.619783
AF	chr7	30282896	2.28311	0.00521059	BF	chr2	16646875	0.207761	0.619783
AF	chr1	11757881	2.28302	0.00521165	BF	chr3	9467190	0.207761	0.619783
AF	chr5	6958838	2.28302	0.00521165	BF	chr3	11112340	0.207761	0.619783
AF	chr5	6958891	2.28302	0.00521165	BF	chr3	23955748	0.207761	0.619783
AF	chr5	29626291	2.28302	0.00521165	BF	chr3	24035256	0.207761	0.619783
AF	chr6	26010784	2.28302	0.00521165	BF	chr3	31582824	0.207761	0.619783
AF	chr4	5217906	2.28143	0.00523086	BF	chr3	31582864	0.207761	0.619783
AF	chr3	21366461	2.28096	0.00523648	BF	chr3	32277354	0.207761	0.619783
AF	chr3	43670997	2.28096	0.00523648	BF	chr3	38827867	0.207761	0.619783
AF	chr4	7256320	2.28096	0.00523648	BF	chr3	39812183	0.207761	0.619783
AF	chr5	1337881	2.28096	0.00523648	BF	chr4	78552	0.207761	0.619783
AF	chr5	15147572	2.28096	0.00523648	BF	chr4	7112517	0.207761	0.619783
AF	chr7	434506	2.28096	0.00523648	BF	chr4	27343539	0.207761	0.619783
AF	chr7	22339041	2.28096	0.00523648	BF	chr4	32106909	0.207761	0.619783
AF	chr7	34957301	2.28096	0.00523648	BF	chr5	4596323	0.207761	0.619783
AF	chr3	38020656	2.27935	0.00525594	BF	chr5	11374596	0.207761	0.619783
AF	chr5	6229008	2.27935	0.00525594	BF	chr6	22680958	0.207761	0.619783
AF	chr4	6370623	2.27747	0.00527874	BF	chr7	29196280	0.207761	0.619783
AF	chr4	6370638	2.27747	0.00527874	BF	chr7	29196281	0.207761	0.619783
AF	chr6	8752654	2.27729	0.00528087	BF	chr4	36681116	0.211171	0.614935
AF	chr4	4896289	2.27661	0.00528919	BF	chr5	9222360	0.211171	0.614935
AF	chr4	5533722	2.27661	0.00528919	BF	chr7	41143966	0.211171	0.614935
AF	chr4	6153360	2.27661	0.00528919	BF	chr2	9973902	0.21345	0.611716
AF	chr2	37298586	2.27639	0.0052919	BF	chr3	7015482	0.21345	0.611716
AF	chr1	15956043	2.27631	0.00529281	BF	chr3	35146380	0.21345	0.611716
AF	chr3	43121643	2.27631	0.00529281	BF	chr3	36198470	0.21345	0.611716
AF	chr5	36779621	2.27631	0.00529281	BF	chr4	1059015	0.21345	0.611716
AF	chr7	36598255	2.27631	0.00529281	BF	chr7	35874692	0.21345	0.611716
AF	chr4	7643947	2.27627	0.0052934	BF	chr7	37493753	0.21345	0.611716
AF	chr1	96235	2.27441	0.00531612	BF	chr7	37554118	0.21345	0.611716
AF	chr1	3294637	2.27441	0.00531612	BF	chr7	37554131	0.21345	0.611716
AF	chr2	2997257	2.27441	0.00531612	BF	chr1	16858619	0.223895	0.59718
AF	chr2	11085496	2.27441	0.00531612	BF	chr2	12043732	0.223895	0.59718
AF	chr2	17476758	2.27441	0.00531612	BF	chr2	12043763	0.223895	0.59718
AF	chr2	17476788	2.27441	0.00531612	BF	chr2	12043764	0.223895	0.59718
AF	chr2	31171272	2.27441	0.00531612	BF	chr2	12043774	0.223895	0.59718
AF	chr3	8935808	2.27441	0.00531612	BF	chr2	12899289	0.223895	0.59718
AF	chr3	24929605	2.27441	0.00531612	BF	chr2	20365164	0.223895	0.59718
AF	chr3	32277464	2.27441	0.00531612	BF	chr2	28633033	0.223895	0.59718
AF	chr3	33352732	2.27441	0.00531612	BF	chr2	36514796	0.223895	0.59718
AF	chr4	17956865	2.27441	0.00531612	BF	chr3	4366353	0.223895	0.59718
AF	chr5	4088093	2.27441	0.00531612	BF	chr3	9029852	0.223895	0.59718
AF	chr5	4088101	2.27441	0.00531612	BF	chr3	28425396	0.223895	0.59718
AF	chr5	6021549	2.27441	0.00531612	BF	chr3	39812257	0.223895	0.59718
AF	chr6	7739218	2.27441	0.00531612	BF	chr4	3556118	0.223895	0.59718
AF	chr6	25778963	2.27441	0.00531612	BF	chr4	14994572	0.223895	0.59718
AF	chr6	25937053	2.27441	0.00531612	BF	chr5	14672454	0.223895	0.59718
AF	chr7	26902562	2.27441	0.00531612	BF	chr5	18026309	0.223895	0.59718
AF	chr3	33078224	2.27402	0.00532086	BF	chr5	29924407	0.223895	0.59718
AF	chr3	33078225	2.27402	0.00532086	BF	chr7	10379686	0.223895	0.59718
AF	chr3	33401302	2.27402	0.00532086	BF	chr7	25003893	0.223895	0.59718
AF	chr3	37077534	2.27402	0.00532086	BF	chr7	25232909	0.223895	0.59718
AF	chr4	6335337	2.27402	0.00532086	BF	chr7	25232914	0.223895	0.59718
AF	chr4	11603234	2.27402	0.00532086	BF	chr2	15167525	0.236011	0.58075
AF	chr4	24841024	2.27402	0.00532086	BF	chr3	37358102	0.236011	0.58075
AF	chr4	24841025	2.27402	0.00532086	BF	chr3	37508003	0.236011	0.58075
AF	chr4	24841080	2.27402	0.00532086	BF	chr3	39739509	0.236011	0.58075
AF	chr4	24841085	2.27402	0.00532086	BF	chr5	13293036	0.236011	0.58075
AF	chr5	211260	2.27402	0.00532086	BF	chr6	24080903	0.236011	0.58075
AF	chr5	791908	2.27402	0.00532086	BF	chr7	33437064	0.236011	0.58075
AF	chr5	3325914	2.27402	0.00532086	BF	chr1	24615550	0.242295	0.572407
AF	chr6	27007318	2.27402	0.00532086	BF	chr2	16659406	0.242295	0.572407
AF	chr1	3714617	2.26958	0.00537556	BF	chr2	35919029	0.242295	0.572407
AF	chr2	6703213	2.26958	0.00537556	BF	chr2	35919030	0.242295	0.572407
AF	chr3	43582207	2.26958	0.00537556	BF	chr3	6856357	0.242295	0.572407
AF	chr1	21308942	2.26945	0.00537713	BF	chr3	8444873	0.242295	0.572407
AF	chr4	4445674	2.26926	0.00537947	BF	chr3	41949108	0.242295	0.572407
AF	chr5	306590	2.26913	0.00538103	BF	chr4	1656136	0.242295	0.572407
AF	chr5	306599	2.26913	0.00538103	BF	chr4	5271516	0.242295	0.572407
AF	chr3	1386361	2.26698	0.00540775	BF	chr4	6303055	0.242295	0.572407
AF	chr3	40475754	2.26698	0.00540775	BF	chr5	2433064	0.242295	0.572407
AF	chr3	43391603	2.26698	0.00540775	BF	chr6	6990178	0.242295	0.572407
AF	chr4	12795742	2.26698	0.00540775	BF	chr6	7082315	0.242295	0.572407
AF	chr5	14404202	2.26698	0.00540775	BF	chr7	25214648	0.242295	0.572407
AF	chr3	34964275	2.26628	0.00541657	BF	chr7	25214650	0.242295	0.572407
AF	chr4	3067571	2.26445	0.00543944	BF	chr7	25214663	0.242295	0.572407
AF	chr4	3180262	2.26445	0.00543944	BF	chr7	25214668	0.242295	0.572407
AF	chr4	4409057	2.26445	0.00543944	BF	chr7	32439878	0.242295	0.572407
[truncated: 24,927 more rows]
