# Supplementary material for: Two Loci, RiAF3 and RiAF4, Contribute to the Annual-Fruiting Trait in Rubus
Source: Front Plant Sci. 2019 Oct 25;10:1341. doi: 10.3389/fpls.2019.01341 (PMC6824294; doi:10.3389/fpls.2019.01341)
Supplement: Supplementary file 5 [file Table_5.xlsx]

## Sheet: Table S5
Table S5. List of all genes in the genomic interval of RiAF3 (35 to 43.7 Mb) and RiAF4 (0 to 10.58 Mb). Gene models and their physical location (bp) in the R. occidentalis genome (ORUS 4115-3 v3.0, VanBuren et al. 2018) and closest Arabidopsis orthologue and biological function. N/A = Arabidopsis orthologues not identified.
Rubus gene models	Physical location (bp)	Arsbidopsis orthologue	Biological function in Arabidopsis
Ro03_G24419	43717084	AT5G36950.1	DEG10 degradation of periplasmic proteins 10
Ro03_G24417	43710680	AT3G52155.1	#N/A
Ro03_G24416	43696909	AT1G79610.1	ATNHX6 ARABIDOPSIS NA+/H+ ANTIPORTER 6
Ro03_G24414	43685360	AT4G17150.1	#N/A
Ro03_G24413	43674207	AT3G24120.1	#N/A
Ro03_G24412	43670719	AT5G60710.1	#N/A
Ro03_G24411	43666296	AT4G02750.1	#N/A
Ro03_G24409	43652968	AT5G47780.1	GAUT4 galacturonosyltransferase 4
Ro03_G24406	43650189	AT4G17170.1	AT-RAB2
Ro03_G10142	43635098	AT5G20250.1	DIN10 DARK INDUCIBLE 10
Ro03_G10144	43627122	AT5G47810.1	PFK2 phosphofructokinase 2
Ro03_G33226	43622814	AT4G17180.1	#N/A
Ro03_G33225	43621546	AT1G55800.1	#N/A
Ro03_G10146	43617158	#N/A	#N/A
Ro03_G10147	43612502	AT5G47800.1	#N/A
Ro03_G10148	43604983	AT5G47790.1	#N/A
Ro03_G10149	43598741	AT1G03370.1	#N/A
Ro03_G10150	43592835	AT5G47770.1	FPS1 farnesyl diphosphate synthase 1
Ro03_G10151	43588380	AT5G47760.1	ATPGLP2 2-phosphoglycolate phosphatase 2
Ro03_G10152	43579160	AT5G47750.1	D6PKL2 D6 protein kinase like 2
Ro03_G33204	43576698	#N/A	#N/A
Ro03_G10154	43570350	AT1G55840.1	#N/A
Ro03_G10155	43566977	AT1G12150.1	#N/A
Ro03_G33206	43562184	AT5G47720.1	AACT1 acetoacetyl-CoA thiolase 1
Ro03_G10157	43560370	AT2G22260.1	ALKBH2 homolog of E. coli alkB
Ro03_G10158	43543373	AT5G47690.1	#N/A
Ro03_G10159	43539557	AT5G47680.1	AtTRM
Ro03_G10163	43533693	AT1G76890.2	AT-GT2
Ro03_G10162	43528980	AT5G47650.1	ATNUDT2 nudix hydrolase homolog 2
Ro03_G10164	43524968	AT2G40113.1	#N/A
Ro03_G10165	43518384	AT4G16360.1	#N/A
Ro03_G33205	43515098	AT4G16370.1	ATOPT3 oligopeptide transporter
Ro03_G10166	43504023	AT5G50740.1	#N/A
Ro03_G10167	43497868	AT4G16380.1	#N/A
Ro03_G10168	43494499	AT4G16390.1	SVR7 suppressor of variegation 7
Ro03_G10170	43489412	AT2G01750.1	ATMAP70-3 microtubule-associated protein
Ro03_G10171	43484132	AT4G16400.1	#N/A
Ro03_G10173	43478736	AT5G28530.1	FRS10 FAR1-related sequence 10
Ro03_G27921	43476223	AT3G09950.1	#N/A
Ro03_G10175	43468952	AT4G16410.1	#N/A
Ro03_G10176	43463366	AT5G55600.1	#N/A
Ro03_G10177	43457716	AT4G16420.1	ADA2B homolog of yeast ADA2 2B
Ro03_G10178	43449151	AT2G35760.1	#N/A
Ro03_G10179	43443596	AT4G16440.1	GOLLUM Growth at different Oxygen Levels Infl
Ro03_G10180	43442546	AT4G16447.1	#N/A
Ro03_G10181	43439979	#N/A	#N/A
Ro03_G10182	43429170	AT3G63380.1	#N/A
Ro03_G10183	43425461	AT4G16450.1	#N/A
Ro03_G33208	43420889	#N/A	#N/A
Ro03_G10184	43418907	AT1G50600.1	SCL5 scarecrow-like 5
Ro03_G10185	43417343	AT4G16460.1	#N/A
Ro03_G10186	43414173	#N/A	#N/A
Ro03_G10187	43391707	#N/A	#N/A
Ro03_G33210	43391463	#N/A	#N/A
Ro03_G10188	43386697	AT4G16470.1	#N/A
Ro03_G10189	43384500	#N/A	#N/A
Ro03_G33207	43382436	AT5G47520.1	AtRABA5a RAB GTPase homolog A5A
Ro03_G10191	43381641	#N/A	#N/A
Ro03_G10192	43371562	AT4G16480.1	ATINT4
Ro03_G10193	43368376	AT4G16490.1	#N/A
Ro03_G10194	43357678	AT4G17280.1	#N/A
Ro03_G10195	43353896	AT3G02870.1	VTC4
Ro03_G33200	43349536	AT5G47540.1	#N/A
Ro03_G33201	43348624	AT5G47550.1	#N/A
Ro03_G10197	43345371	AT5G47560.1	ATSDAT
Ro03_G10198	43336212	AT4G12560.1	CPR1 CONSTITUTIVE EXPRESSER OF PR GENES 1
Ro03_G10199	43322131	AT4G12570.1	UPL5 ubiquitin protein ligase 5
Ro03_G10200	43321706	#N/A	#N/A
Ro03_G10201	43317044	AT4G12590.1	#N/A
Ro03_G10202	43315080	AT4G22370.1	#N/A
Ro03_G10203	43312136	AT4G22360.1	#N/A
Ro03_G10204	43306481	AT5G20130.1	#N/A
Ro03_G33202	43304072	AT3G07880.1	SCN1 SUPERCENTIPEDE1
Ro03_G10207	43298928	AT4G22285.1	#N/A
Ro03_G10209	43292806	AT3G51970.1	ASAT1 acyl-CoA sterol acyl transferase 1
Ro03_G10210	43290360	AT5G55290.1	#N/A
Ro03_G10211	43288429	AT1G12060.1	ATBAG5 BCL-2-associated athanogene 5
Ro03_G10212	43284640	AT1G12050.1	AtFAH
Ro03_G10213	43273714	AT4G12610.1	ATRAP74
Ro03_G10214	43272389	#N/A	#N/A
Ro03_G10216	43259684	AT4G22340.1	CDS2 cytidinediphosphate diacylglycerol syn
Ro03_G10217	43257394	AT4G22330.1	ATCES1
Ro03_G10218	43251364	AT1G12030.1	#N/A
Ro03_G33193	43246330	AT4G22320.1	#N/A
Ro03_G10219	43238262	AT4G22320.1	#N/A
Ro03_G10220	43229366	AT2G47980.1	ATSCC3 SISTER-CHROMATID COHESION PROTEIN 3
Ro03_G10221	43223305	#N/A	#N/A
Ro03_G33192	43195212	#N/A	#N/A
Ro03_G10224	43190811	AT4G22300.1	SOBER1 SUPPRESSOR OF AVRBST-ELICITED RESISTAN
Ro03_G10225	43189093	AT1G12020.1	#N/A
Ro03_G10227	43183024	AT1G62400.1	HT1 high leaf temperature 1
Ro03_G10229	43175153	AT4G22290.1	#N/A
Ro03_G10230	43172990	AT4G05530.1	IBR1 indole-3-butyric acid response 1
Ro03_G10231	43169808	AT4G05520.1	ATEHD2 EPS15 homology domain 2
Ro03_G10238	43139415	AT4G22260.1	IM IMMUTANS
Ro03_G10239	43134574	AT2G32950.1	ATCOP1 ARABIDOPSIS THALIANA CONSTITUTIVE PHOT
Ro03_G10240	43129765	AT1G62390.1	CLMP1 CLUMPED CHLOROPLASTS 1
Ro03_G10241	43127357	AT1G05010.1	ACO4 ethylene forming enzyme
Ro03_G10242	43121227	AT4G22250.1	#N/A
Ro03_G10244	43115590	AT4G04020.1	FIB fibrillin
Ro03_G10245	43108125	AT5G04690.1	#N/A
Ro03_G10250	43068501	AT1G11820.2	#N/A
Ro03_G33179	43045123	#N/A	#N/A
Ro03_G10254	43036436	AT1G12000.1	#N/A
Ro03_G10255	43030935	AT4G22190.1	#N/A
Ro03_G13519	43019459	AT4G22150.1	PUX3 plant UBX domain-containing protein 3
Ro03_G27849	42971236	#N/A	#N/A
Ro03_G33187	42949487	#N/A	#N/A
Ro03_G13515	42933035	AT1G62360.1	BUM BUMBERSHOOT
Ro03_G13514	42925341	AT4G22140.1	EBS EARLY BOLTING IN SHORT DAYS
Ro03_G13513	42914258	AT1G80930.1	#N/A
Ro03_G13511	42904147	AT4G22130.1	SRF8 STRUBBELIG-receptor family 8
Ro03_G13510	42897401	AT4G04320.1	#N/A
Ro03_G13509	42896457	AT4G04330.1	AtRbcX1
Ro03_G33188	42883860	AT4G22120.1	#N/A
Ro03_G13506	42877219	AT1G11950.1	#N/A
Ro03_G13505	42866396	AT4G04350.1	EMB2369 EMBRYO DEFECTIVE 2369
Ro03_G13503	42860740	AT1G11940.1	#N/A
Ro03_G13504	42857685	AT4G04370.1	#N/A
Ro03_G33168	42855098	AT1G11930.1	#N/A
Ro03_G13500	42842349	#N/A	#N/A
Ro03_G13497	42826359	AT1G11915.1	#N/A
Ro03_G13495	42815340	AT1G62300.1	ATWRKY6
Ro03_G13494	42808820	AT1G62290.1	#N/A
Ro03_G13493	42805724	AT5G55090.1	MAPKKK15 mitogen-activated protein kina
Ro03_G13492	42791565	AT5G42570.1	#N/A
Ro03_G13491	42784387	#N/A	#N/A
Ro03_G13490	42778955	AT3G14400.1	UBP25 ubiquitin-specific protease 25
Ro03_G13489	42776636	AT2G41380.1	#N/A
Ro03_G20658	42774046	#N/A	#N/A
Ro03_G13487	42768545	AT4G04470.1	PMP22
Ro03_G13485	42764206	#N/A	#N/A
Ro03_G13484	42762228	AT1G11860.1	#N/A
Ro03_G13483	42753073	AT2G02060.1	#N/A
Ro03_G13482	42747684	AT4G22010.1	sks4 SKU5 similar 4
Ro03_G13480	42736826	AT1G11820.2	#N/A
Ro03_G13479	42732783	AT4G04610.1	APR
Ro03_G33190	42728608	#N/A	#N/A
Ro03_G13476	42711102	#N/A	#N/A
Ro03_G13475	42708235	AT3G44590.1	#N/A
Ro03_G33191	42703920	AT1G11840.1	ATGLX1 glyoxalase I homolog
Ro03_G13471	42694175	AT1G11790.1	ADT1 arogenate dehydratase 1
Ro03_G13470	42688618	AT1G62050.1	#N/A
Ro03_G13469	42686849	#N/A	#N/A
Ro03_G13468	42685279	AT2G05630.1	ATG8D
Ro03_G13466	42679276	#N/A	#N/A
Ro03_G13464	42674735	AT1G05170.1	#N/A
Ro03_G13463	42654215	AT4G04630.1	#N/A
Ro03_G13462	42643702	AT1G11720.1	ATSS3 starch synthase 3
Ro03_G13460	42639092	AT4G04640.1	ATPC1
Ro03_G13459	42630800	AT1G64570.1	DUO3 DUO POLLEN 3
Ro03_G13458	42618433	AT4G04670.1	#N/A
Ro03_G10601	42601228	AT4G04670.1	#N/A
Ro03_G10600	42596634	AT4G21960.1	PRXR1
Ro03_G33160	42586404	AT1G50700.1	CPK33 calcium-dependent protein kinase 33
Ro03_G10597	42582269	AT1G11700.1	#N/A
Ro03_G10593	42554251	AT1G50660.1	#N/A
Ro03_G10592	42552559	#N/A	#N/A
Ro03_G10591	42547409	AT1G61900.1	#N/A
Ro03_G33170	42534077	AT3G21690.1	#N/A
Ro03_G10588	42525605	AT3G21690.1	#N/A
Ro03_G10587	42522965	AT4G21903.1	#N/A
Ro03_G10585	42510567	AT2G33610.1	ATSWI3B switch subunit 3
Ro03_G10584	42507349	AT4G04770.1	ABC1 ATP binding cassette protein 1
Ro03_G10583	42502433	AT5G52890.1	#N/A
Ro03_G10582	42500216	#N/A	#N/A
Ro03_G10580	42494378	AT1G11650.1	ATRBP45B
Ro03_G10579	42490724	AT4G21890.1	#N/A
Ro03_G33171	42489427	#N/A	#N/A
Ro03_G10577	42479573	AT4G21820.1	#N/A
Ro03_G10576	42468697	AT4G04860.1	DER2.2 DERLIN-2.2
Ro03_G10575	42463712	AT4G21790.1	ATTOM1
Ro03_G10574	42456174	AT1G61870.1	PPR336 pentatricopeptide repeat 336
Ro03_G10572	42444667	#N/A	#N/A
Ro03_G10571	42440844	AT4G04870.1	CLS cardiolipin synthase
Ro03_G10570	42437730	AT4G21780.1	#N/A
Ro03_G10568	42429624	AT1G61850.1	#N/A
Ro03_G10567	42418682	AT4G04880.1	#N/A
Ro03_G10566	42415504	AT4G21770.1	#N/A
Ro03_G10564	42407151	AT4G21760.1	BGLU47 beta-glucosidase 47
Ro03_G10563	42403331	AT1G49610.1	#N/A
Ro03_G10562	42394899	AT4G04885.1	PCFS4 PCF11P-similar protein 4
Ro03_G10561	42382521	AT4G21750.1	ATML1 MERISTEM LAYER 1
Ro03_G10558	42364325	#N/A	#N/A
Ro03_G10557	42348598	AT2G33460.1	RIC1 ROP-interactive CRIB motif-containing
Ro03_G10556	42345231	AT1G11580.1	ATPMEPCRA
Ro03_G10555	42343490	AT1G27970.1	NTF2B nuclear transport factor 2B
Ro03_G10553	42340311	AT1G61790.1	OST3/6 oligosaccharyltransferase subunit 3/6
Ro03_G10552	42338160	AT4G21170.1	#N/A
Ro03_G10551	42333300	AT1G11545.1	XTH8 xyloglucan endotransglucosylase/hydrol
Ro03_G10550	42331245	AT1G61780.1	#N/A
Ro03_G10548	42320496	AT5G15170.1	TDP1 tyrosyl-DNA phosphodiesterase 1
Ro03_G10547	42317035	AT1G61770.1	#N/A
Ro03_G10546	42309096	AT4G21200.1	ATGA2OX8 ARABIDOPSIS THALIANA GIBBERELL
Ro03_G33153	42301944	AT4G21210.1	ATRP1 PPDK regulatory protein
Ro03_G10544	42296996	AT4G21215.2	#N/A
Ro03_G10542	42282653	AT4G05220.1	#N/A
Ro03_G10540	42276481	AT4G21220.1	AtLpxD2
Ro03_G10538	42253963	AT4G23180.1	CRK10 cysteine-rich RLK (RECEPTOR-like prote
Ro03_G10536	42246184	AT4G23310.1	CRK23 cysteine-rich RLK (RECEPTOR-like prote
Ro03_G33230	42231937	AT4G23180.1	CRK10 cysteine-rich RLK (RECEPTOR-like prote
Ro03_G33229	42230332	AT3G16030.1	CES101 CALLUS EXPRESSION OF RBCS 101
Ro03_G10535	42224019	AT4G23230.1	CRK15 cysteine-rich RLK (RECEPTOR-like prote
Ro03_G10533	42217265	AT4G23180.1	CRK10 cysteine-rich RLK (RECEPTOR-like prote
Ro03_G33231	42212591	#N/A	#N/A
Ro03_G10532	42210868	#N/A	#N/A
Ro03_G33227	42192114	AT4G23180.1	CRK10 cysteine-rich RLK (RECEPTOR-like prote
Ro03_G33228	42191404	AT1G61400.1	#N/A
Ro03_G10530	42177482	AT1G61740.1	#N/A
Ro03_G10529	42174205	AT1G51070.1	bHLH115 basic Helix-Loop-Helix 115
Ro03_G33159	42171866	AT1G11530.1	ATCXXS1 C-terminal cysteine residue is changed
Ro03_G10527	42166621	AT4G05190.1	ATK5 kinesin 5
Ro03_G10526	42163828	AT4G05180.1	PSBQ PHOTOSYSTEM II SUBUNIT Q
Ro03_G10525	42160070	#N/A	#N/A
Ro03_G10524	42158724	AT3G20670.1	HTA13 histone H2A 13
Ro03_G10523	42157810	AT4G21310.1	#N/A
Ro03_G10522	42153887	AT4G21320.1	HSA32 HEAT-STRESS-ASSOCIATED 32
Ro03_G10520	42148608	AT1G61720.1	BAN BANYULS
Ro03_G10519	42145584	AT5G54590.2	CRLK1 calcium/calmodulin-regulated receptor-
Ro03_G10518	42132262	#N/A	#N/A
Ro03_G10517	42124120	AT3G22104.1	#N/A
Ro03_G10516	42119008	AT1G61690.1	#N/A
Ro03_G10513	42094138	AT1G61680.1	ATTPS14 TERPENE SYNTHASE 14
Ro03_G10514	42092677	AT3G13160.1	#N/A
Ro03_G10511	42088767	AT5G54530.1	#N/A
Ro03_G10510	42086884	AT1G11440.1	#N/A
Ro03_G10508	42073673	AT1G61660.1	#N/A
Ro03_G10507	42066965	AT5G54500.1	FQR1 flavodoxin-like quinone reductase 1
Ro03_G10506	42062905	AT4G21350.1	B80
Ro03_G33211	42041967	AT1G11340.1	#N/A
Ro03_G33214	42028156	AT4G21390.1	B120
Ro03_G33213	41993639	AT4G11530.1	CRK34 cysteine-rich RLK (RECEPTOR-like prote
Ro03_G33212	41977161	AT4G27300.1	#N/A
Ro03_G33219	41967177	AT4G27300.1	#N/A
Ro03_G33221	41963647	AT4G27300.1	#N/A
Ro03_G33218	41950798	AT4G27300.1	#N/A
Ro03_G33216	41943230	AT1G61400.1	#N/A
Ro03_G05884	41919111	AT4G21380.1	ARK3 receptor kinase 3
Ro03_G33217	41917089	AT1G61500.1	#N/A
Ro03_G05887	41909389	AT4G21390.1	B120
Ro03_G33224	41905691	AT2G46600.1	#N/A
Ro03_G33220	41890031	AT2G46600.1	#N/A
Ro03_G33222	41884892	AT4G27280.1	#N/A
Ro03_G33223	41881158	AT4G27280.1	#N/A
Ro03_G05889	41873811	AT4G27310.1	BBX28 B-box domain protein 28
Ro03_G05890	41870187	AT1G11360.1	#N/A
Ro03_G05891	41867343	AT1G61620.1	#N/A
Ro03_G05892	41863617	AT1G11380.1	#N/A
Ro03_G05893	41860431	AT1G79180.1	ATMYB63 MYB DOMAIN PROTEIN 63
Ro03_G33165	41855704	AT5G45460.1	#N/A
Ro03_G05896	41849214	AT5G45540.1	#N/A
Ro03_G05897	41846012	AT5G45500.1	#N/A
Ro03_G33162	41838198	AT4G05200.1	CRK25 cysteine-rich RLK (RECEPTOR-like prote
Ro03_G33166	41835157	AT4G11470.1	CRK31 cysteine-rich RLK (RECEPTOR-like prote
Ro03_G05898	41824449	#N/A	#N/A
Ro03_G33163	41822281	AT1G11410.1	#N/A
Ro03_G33161	41816368	AT4G23280.1	CRK20 cysteine-rich RLK (RECEPTOR-like prote
Ro03_G05899	41811999	AT4G03270.1	CYCD6;1 Cyclin D6;1
Ro03_G05900	41804351	AT4G05150.1	#N/A
Ro03_G05901	41791404	AT4G05120.1	ATENT3
Ro03_G05903	41778451	AT4G21430.1	B160
Ro03_G05904	41771180	AT1G11390.1	#N/A
Ro03_G33138	41761450	AT4G21440.1	ATM4 A. THALIANA MYB 4
Ro03_G33137	41754858	AT4G05090.1	#N/A
Ro03_G05909	41753325	AT4G05090.1	#N/A
Ro03_G05910	41750406	AT4G21445.1	#N/A
Ro03_G05911	41746759	AT4G21450.1	#N/A
Ro03_G05912	41745361	#N/A	#N/A
Ro03_G05913	41739332	#N/A	#N/A
Ro03_G05915	41708964	AT1G11260.1	ATSTP1 SUGAR TRANSPORTER 1
Ro03_G05918	41693136	AT1G61350.1	#N/A
Ro03_G05919	41682743	AT4G27360.1	#N/A
Ro03_G05920	41677555	AT2G20800.1	NDB4 NAD(P)H dehydrogenase B4
Ro03_G05921	41672737	#N/A	#N/A
Ro03_G05922	41667618	#N/A	#N/A
Ro03_G05923	41665923	AT1G61340.1	AtFBS1
Ro03_G33152	41637009	AT4G21520.1	#N/A
Ro03_G05925	41619588	AT4G21530.1	APC4 anaphase promoting complex 4
Ro03_G33151	41613239	AT2G18750.1	#N/A
Ro03_G05928	41610766	AT1G11240.1	#N/A
Ro03_G05929	41607076	AT4G21540.1	SPHK1 sphingosine kinase 1
Ro03_G05930	41595233	AT2G30470.1	HSI2 high-level expression of sugar-inducib
Ro03_G05931	41591241	AT1G61290.1	ATSYP124
Ro03_G05933	41589608	AT4G21560.1	VPS28 vacuolar protein sorting 28
Ro03_G05932	41583409	AT5G28740.1	#N/A
Ro03_G05934	41579423	AT1G61260.1	#N/A
Ro03_G05935	41571021	AT5G54310.1	AGD5 ARF-GAP domain 5
Ro03_G05939	41557049	AT1G11200.1	#N/A
Ro03_G05940	41550661	AT5G20710.1	BGAL7 beta-galactosidase 7
Ro03_G33147	41548392	AT4G21580.1	#N/A
Ro03_G33148	41544805	AT4G21580.1	#N/A
Ro03_G05941	41537979	AT1G11190.1	BFN1 bifunctional nuclease i
Ro03_G05943	41532846	AT1G07180.1	ATNDI1 ARABIDOPSIS THALIANA INTERNAL NON-PHOS
Ro03_G05945	41520568	#N/A	#N/A
Ro03_G05946	41518570	#N/A	#N/A
Ro03_G05948	41510897	AT5G54390.1	AHL HAL2-like
Ro03_G05949	41508073	AT4G21620.1	#N/A
Ro03_G05952	41491005	AT4G21530.1	APC4 anaphase promoting complex 4
Ro03_G05953	41489677	AT2G24300.1	#N/A
Ro03_G06443	41480971	AT4G21470.1	ATFMN/FHY riboflavin kinase/FMN hydrolas
Ro03_G06446	41464231	AT1G61250.1	AtSCAMP1
Ro03_G06447	41458079	AT1G61240.1	#N/A
Ro03_G06448	41452410	AT1G61215.1	BRD4 bromodomain 4
Ro03_G06450	41437919	AT1G61210.1	DWA3 DWD hypersensitive to ABA 3
Ro03_G06454	41410645	AT4G03390.1	SRF3 STRUBBELIG-receptor family 3
Ro03_G06456	41403921	AT1G61170.1	#N/A
Ro03_G06457	41397911	AT1G11120.2	#N/A
Ro03_G06459	41392582	#N/A	#N/A
Ro03_G06460	41388107	#N/A	#N/A
Ro03_G06461	41384257	AT1G61150.1	#N/A
Ro03_G33130	41371860	AT1G50410.1	#N/A
Ro03_G06463	41371272	AT1G11090.1	#N/A
Ro03_G33131	41356243	AT4G15100.1	scpl30 serine carboxypeptidase-like 30
Ro03_G06466	41350551	AT3G15510.1	ANAC056 Arabidopsis NAC domain containing prot
Ro03_G06468	41326723	AT4G04980.1	#N/A
Ro03_G06469	41310137	#N/A	#N/A
Ro03_G06471	41286201	#N/A	#N/A
Ro03_G06472	41283159	#N/A	#N/A
Ro03_G06473	41281858	#N/A	#N/A
Ro03_G06474	41278650	AT1G61065.1	#N/A
Ro03_G06475	41276649	AT1G28310.1	#N/A
Ro03_G33129	41267773	AT4G21660.1	#N/A
Ro03_G06477	41263846	AT2G20780.1	#N/A
Ro03_G06478	41260302	AT5G01250.1	#N/A
Ro03_G06479	41249118	AT4G15955.1	#N/A
Ro03_G06480	41243021	AT1G11060.1	#N/A
Ro03_G06483	41229331	#N/A	#N/A
Ro03_G06485	41204999	AT4G21670.1	ATCPL1 C-TERMINAL DOMAIN PHOSPHATASE-LIKE 1
Ro03_G06486	41201677	AT2G20760.1	#N/A
Ro03_G06487	41198245	AT3G14840.2	#N/A
Ro03_G06488	41184945	AT4G04920.1	AtSFR6
Ro03_G06489	41170047	AT2G47960.1	#N/A
Ro03_G06490	41168770	AT4G27450.1	#N/A
Ro03_G06491	41162320	AT4G36690.1	ATU2AF65A
Ro03_G06492	41156590	AT5G53750.1	#N/A
Ro03_G06493	41153546	#N/A	#N/A
Ro03_G06494	41146793	AT4G04930.1	DES-1-LIKE
Ro03_G06495	41145231	AT2G20740.1	#N/A
Ro03_G06496	41139765	AT4G17020.1	#N/A
Ro03_G06497	41136567	AT4G21720.1	#N/A
Ro03_G06498	41129246	AT4G04955.1	ALN allantoinase
Ro03_G06499	41123016	AT1G65070.1	#N/A
Ro03_G06501	41111026	AT4G04950.1	AtGRXS17 Arabidopsis thaliana monothiol
Ro03_G06504	41100107	#N/A	#N/A
Ro03_G06505	41092782	AT4G27470.1	ATRMA3
Ro03_G06506	41085863	AT2G33793.1	#N/A
Ro03_G06507	41083519	AT4G21610.1	LOL2 lsd one like 2
Ro03_G06508	41077793	AT3G45620.1	#N/A
Ro03_G06509	41067813	AT4G21710.1	EMB1989 EMBRYO DEFECTIVE 1989
Ro03_G06511	41061932	AT3G45620.1	#N/A
Ro03_G06512	41057325	AT1G53000.1	AtCKS
Ro03_G06513	41055402	AT2G33760.1	#N/A
Ro03_G33142	41047931	AT4G04970.1	ATGSL01 GLUCAN SYNTHASE LIKE 1
Ro03_G06515	41041028	AT4G21700.1	#N/A
Ro03_G33141	41036439	AT2G33770.1	ATUBC24 UBIQUITIN-CONJUGATING ENZYME 24
Ro03_G06517	41033977	#N/A	#N/A
Ro03_G06518	41024783	#N/A	#N/A
Ro03_G33145	41014668	AT4G04910.1	NSF N-ethylmaleimide sensitive factor
Ro03_G33146	41004809	AT4G04910.1	NSF N-ethylmaleimide sensitive factor
Ro03_G33144	41001591	AT1G17420.1	ATLOX3 Arabidopsis thaliana lipoxygenase 3
Ro03_G33143	40989186	AT1G72520.1	ATLOX4 Arabidopsis thaliana lipoxygenase 4
Ro03_G06520	40988244	AT1G53035.1	#N/A
Ro03_G06521	40983105	AT1G28240.1	#N/A
Ro03_G06522	40967538	AT4G04960.1	#N/A
Ro03_G06523	40961537	AT4G32480.1	#N/A
Ro03_G06524	40951562	AT5G58950.1	#N/A
Ro03_G06525	40940392	AT4G20970.1	#N/A
Ro03_G06526	40935685	AT4G20980.1	#N/A
Ro03_G06527	40931561	AT2G34700.1	#N/A
Ro03_G06529	40924724	AT1G28280.1	#N/A
Ro03_G06532	40909058	AT1G28260.1	#N/A
Ro03_G06533	40907059	AT1G28250.1	#N/A
Ro03_G06534	40900054	AT2G32700.1	LUH LEUNIG_homolog
Ro03_G06535	40898308	AT2G33800.1	EMB3113 EMBRYO DEFECTIVE 3113
Ro03_G06536	40879263	#N/A	#N/A
Ro03_G06538	40873686	AT5G60850.1	OBP4 OBF binding protein 4
Ro03_G06539	40864679	AT1G28310.1	#N/A
Ro03_G33114	40852903	AT2G33810.1	SPL3 squamosa promoter binding protein-like
Ro03_G06540	40849799	AT2G33820.1	ATMBAC1
Ro03_G06542	40843346	AT1G28320.1	DEG15 degradation of periplasmic proteins 15
Ro03_G06543	40837126	AT5G44280.1	ATRING1A ARABIDOPSIS THALIANA RING 1A
Ro03_G06544	40834857	AT1G28330.1	AtDRM1
Ro03_G06546	40826442	AT3G18640.1	#N/A
Ro03_G33113	40806416	AT1G28340.1	AtRLP4 receptor like protein 4
Ro03_G06547	40787837	AT1G28340.1	AtRLP4 receptor like protein 4
Ro03_G06548	40784447	AT1G28360.1	ATERF12 ERF DOMAIN PROTEIN 12
Ro03_G06549	40777846	AT5G53940.1	#N/A
Ro03_G06550	40773657	AT5G44210.1	ATERF-9 ERF DOMAIN PROTEIN- 9
Ro03_G06551	40763622	AT1G28380.1	NSL1 necrotic spotted lesions 1
Ro03_G06552	40760670	AT4G02750.1	#N/A
Ro03_G33112	40758836	#N/A	#N/A
Ro03_G06554	40754832	#N/A	#N/A
Ro03_G06556	40747188	AT2G33847.1	#N/A
Ro03_G06557	40744095	#N/A	#N/A
Ro03_G06558	40734752	AT2G33850.1	#N/A
Ro03_G06559	40731828	AT2G33855.1	#N/A
Ro03_G06560	40727824	AT1G28410.1	#N/A
Ro03_G06561	40719276	AT3G29320.1	PHS1 alpha-glucan phosphorylase 1
Ro03_G06562	40716149	AT2G20560.1	#N/A
Ro03_G06563	40694934	AT1G28420.1	HB-1 homeobox-1
Ro03_G06564	40690400	AT5G46110.4	APE2 ACCLIMATION OF PHOTOSYNTHESIS TO ENVI
Ro03_G06565	40687399	AT5G46100.1	#N/A
Ro03_G06566	40686106	AT5G46090.1	#N/A
Ro03_G05168	40653697	AT1G28440.1	HSL1 HAESA-like 1
Ro03_G05169	40647025	AT1G28470.1	ANAC010 NAC domain containing protein 10
Ro03_G05171	40637837	AT5G46070.1	#N/A
Ro03_G05172	40635356	AT5G08290.1	YLS8 YELLOW-LEAF-SPECIFIC GENE 8
Ro03_G05173	40631857	AT1G28480.1	GRX480
Ro03_G05175	40618310	AT2G33860.1	ARF3 AUXIN RESPONSE TRANSCRIPTION FACTOR 3
Ro03_G05177	40598655	AT5G46060.1	#N/A
Ro03_G05179	40596439	#N/A	#N/A
Ro03_G05180	40590289	AT1G09200.1	H3.1 histone 3.1
Ro03_G05181	40588399	AT1G28510.1	#N/A
Ro03_G05182	40584835	AT1G28520.1	ATVOZ1 VASCULAR PLANT ONE ZINC FINGER PROTEIN
Ro03_G05184	40577867	AT1G28530.2	#N/A
Ro03_G05185	40570252	AT5G54010.1	#N/A
Ro03_G05186	40566966	AT5G46020.1	#N/A
Ro03_G05187	40558533	AT5G60860.1	AtRABA1f RAB GTPase homolog A1F
Ro03_G05189	40544233	AT3G23220.1	ESE1 ethylene and salt inducible 1
Ro03_G05192	40531316	AT5G45950.1	#N/A
Ro03_G05193	40524422	AT4G18470.1	SNI1 SUPPRESSOR OF NPR1-1, INDUCIBLE 1
Ro03_G05194	40522923	AT4G18460.1	#N/A
Ro03_G05195	40520821	AT2G34060.1	#N/A
Ro03_G05196	40505897	AT2G29100.1	ATGLR2.9 glutamate receptor 2.9
Ro03_G05198	40496166	AT2G34040.1	#N/A
Ro03_G05199	40492395	AT3G61180.1	#N/A
Ro03_G05201	40484216	AT1G75660.1	AtXRN3 5'-3' EXORIBONUCLEASE 3
Ro03_G05200	40482598	AT1G42540.1	ATGLR3.3
Ro03_G05204	40468502	AT4G18465.1	#N/A
Ro03_G05205	40463992	#N/A	#N/A
Ro03_G05206	40455830	AT2G33990.1	iqd9 IQ-domain 9
Ro03_G05207	40453779	AT2G31070.1	TCP10 TCP domain protein 10
Ro03_G05208	40446212	AT1G28960.1	ATNUDT15 ARABIDOPSIS THALIANA NUDIX HYD
Ro03_G05209	40443973	AT4G18480.1	CH-42 CHLORINA 42
Ro03_G05213	40434940	AT1G28680.1	#N/A
Ro03_G05214	40428114	AT4G18490.1	#N/A
Ro03_G05218	40406109	AT5G45920.1	#N/A
Ro03_G05219	40401132	AT1G28690.1	#N/A
Ro03_G33107	40399968	AT2G31090.1	#N/A
Ro03_G33106	40392129	AT4G33070.1	AtPDC1
Ro03_G33098	40381480	AT1G28640.1	#N/A
Ro03_G05224	40379216	AT2G31100.1	#N/A
Ro03_G05225	40368430	AT3G25690.1	AtCHUP1 Arabidopsis thaliana CHLOROPLAST UNUSU
Ro03_G33101	40365011	AT1G29040.1	#N/A
Ro03_G05228	40355072	AT1G29070.1	#N/A
Ro03_G05229	40353829	AT2G27420.1	#N/A
Ro03_G05230	40332990	AT2G34090.1	MEE18 maternal effect embryo arrest 18
Ro03_G33095	40330022	#N/A	#N/A
Ro03_G05233	40322763	AT2G41130.1	#N/A
Ro03_G05234	40317522	AT5G45900.1	APG7 AUTOPHAGY 7
Ro03_G05235	40309361	AT2G27430.1	#N/A
Ro03_G05236	40307109	AT5G13480.1	FY
Ro03_G05237	40303348	AT3G15010.1	#N/A
Ro03_G05238	40299394	AT4G35540.1	PTF2 Pollen-expressed Transcription Factor
Ro03_G05240	40294594	#N/A	#N/A
Ro03_G05241	40289523	AT1G29120.1	#N/A
Ro03_G05242	40283985	AT1G26480.1	GF14 IOTA
Ro03_G05244	40273977	AT5G23300.1	PYRD pyrimidine d
Ro03_G05245	40272680	AT1G29160.1	#N/A
Ro03_G05246	40263699	AT2G34150.2	ATRANGAP2
Ro03_G05247	40250950	AT2G42610.1	LSH10 LIGHT SENSITIVE HYPOCOTYLS 10
Ro03_G05248	40243193	AT3G11100.1	#N/A
Ro03_G05250	40235328	AT1G29195.1	#N/A
Ro03_G05253	40224007	AT1G29260.1	ATPEX7 ARABIDOPSIS PEROXIN 7
Ro03_G05254	40221423	AT2G26040.1	PYL2 PYR1-like 2
Ro03_G05255	40217782	AT5G45870.1	PYL12 PYR1-like 12
Ro03_G05256	40209990	AT1G20850.1	XCP2 xylem cysteine peptidase 2
Ro03_G05257	40204210	AT1G29240.1	#N/A
Ro03_G05259	40200767	AT2G38300.1	#N/A
Ro03_G05260	40185256	AT5G45840.2	#N/A
Ro03_G05261	40183923	AT4G18650.1	#N/A
Ro03_G05263	40177398	AT5G45820.1	CIPK20 CBL-interacting protein kinase 20
Ro03_G05264	40173355	AT4G18700.1	ATWL4 WPL4-LIKE 4
Ro03_G05265	40162221	AT3G11710.1	ATKRS-1 lysyl-tRNA synthetase 1
Ro03_G05266	40157260	AT5G45800.1	MEE62 maternal effect embryo arrest 62
Ro03_G05267	40137205	AT1G29220.1	#N/A
Ro03_G33119	40134802	#N/A	#N/A
Ro03_G05268	40129161	AT2G34190.1	#N/A
Ro03_G05269	40125936	AT1G29200.1	#N/A
Ro03_G33118	40124037	AT3G47580.1	#N/A
Ro03_G33116	40121611	AT5G62230.1	ERL1 ERECTA-like 1
Ro03_G05270	40114160	AT4G18710.1	ATSK21 SHAGGY-LIKE KINASE 21
Ro03_G05271	40109025	AT5G45780.1	#N/A
Ro03_G05272	40103968	AT2G34200.1	#N/A
Ro03_G05273	40100622	AT2G42740.1	RPL16A ribosomal protein large subunit 16A
Ro03_G05274	40098604	AT1G06190.1	RHON1 Rho-N 1
Ro03_G33117	40095113	AT4G18750.1	DOT4 DEFECTIVELY ORGANIZED TRIBUTARIES 4
Ro03_G05276	40093090	AT4G18760.1	AtRLP51 receptor like protein 51
Ro03_G05277	40083198	AT4G18780.1	ATCESA8 CELLULOSE SYNTHASE 8
Ro03_G33074	40070375	AT4G05530.1	IBR1 indole-3-butyric acid response 1
Ro03_G05280	40066332	#N/A	#N/A
Ro03_G05281	40063744	AT2G42760.1	#N/A
Ro03_G05284	40029967	AT1G29270.1	#N/A
Ro03_G05285	40024222	AT1G29280.1	ATWRKY65 WRKY DNA-BINDING PROTEIN 65
Ro03_G05286	40016744	AT5G45750.1	AtRABA1c RAB GTPase homolog A1C
Ro03_G05287	40011186	#N/A	#N/A
Ro03_G05288	40005860	AT4G18810.1	#N/A
Ro03_G05290	39997432	AT1G29290.1	#N/A
Ro03_G33075	39987762	AT3G47090.1	#N/A
Ro03_G05291	39975613	AT2G31810.1	#N/A
Ro03_G05293	39966409	#N/A	#N/A
Ro03_G33090	39963049	AT1G06410.1	ATTPS7 trehalose-phosphatase/synthase 7
Ro03_G05295	39957857	AT1G29300.1	UNE1 unfertilized embryo sac 1
Ro03_G05296	39947967	AT1G29330.1	AERD2 ARABIDOPSIS ENDOPLASMIC RETICULUM RETE
Ro03_G05299	39930587	AT4G18820.1	#N/A
Ro03_G05300	39922385	AT1G29340.1	ATPUB17 ARABIDOPSIS THALIANA PLANT U-BOX 17
Ro03_G05301	39917363	AT2G47010.1	#N/A
Ro03_G05302	39914195	AT4G18830.1	ATOFP5
Ro03_G05303	39911840	AT4G18880.1	AT-HSFA4A ARABIDOPSIS THALIANA HEAT SHOC
Ro03_G05304	39904411	AT4G18890.1	BEH3 BES1/BZR1 homolog 3
Ro03_G05305	39900923	AT1G29800.1	#N/A
Ro03_G05306	39897923	#N/A	#N/A
Ro03_G05307	39896711	AT1G29780.1	#N/A
Ro03_G05310	39874710	AT4G18910.1	ATNLM2 NOD26-LIKE INTRINSIC PROTEIN 2
Ro03_G05311	39871113	AT1G29760.1	#N/A
Ro03_G33125	39848330	AT1G53440.1	#N/A
Ro03_G33123	39823745	AT1G29730.1	#N/A
Ro03_G33124	39802110	AT1G53440.1	#N/A
Ro03_G05315	39787140	AT3G14840.2	#N/A
Ro03_G05316	39775744	#N/A	#N/A
Ro03_G05318	39747498	AT3G14840.2	#N/A
Ro03_G33135	39737325	AT3G14840.2	#N/A
Ro03_G33133	39717094	AT1G53440.1	#N/A
Ro03_G05324	39707664	AT1G29690.1	CAD1 constitutively activated cell death 1
Ro03_G33134	39697592	AT4G18930.1	#N/A
Ro03_G05329	39690450	AT4G18950.1	#N/A
Ro03_G05331	39675157	AT4G18960.1	AG AGAMOUS
Ro03_G33082	39669153	AT1G29660.1	#N/A
Ro03_G05332	39652929	AT5G45670.1	#N/A
Ro03_G05333	39647214	AT5G45660.1	#N/A
Ro03_G05334	39634623	AT1G78580.1	ATTPS1 trehalose-6-phosphate synthase
Ro03_G33084	39632073	#N/A	#N/A
Ro03_G33087	39627144	AT5G45650.1	#N/A
Ro03_G05335	39622803	AT4G18975.1	#N/A
Ro03_G33088	39604350	AT4G18060.1	#N/A
Ro03_G33089	39603001	AT4G18060.1	#N/A
Ro03_G33071	39578064	AT4G18050.1	ABCB9 ATP-binding cassette B9
Ro03_G33070	39567695	AT4G14130.1	XTH15 xyloglucan endotransglucosylase/hydrol
Ro03_G13380	39548337	AT4G18040.1	AT.EIF4E1 ARABIDOPSIS THALIANA EUKARYOTI
Ro03_G13381	39543912	AT5G14270.1	ATBET9 bromodomain and extraterminal domain p
Ro03_G33072	39537880	AT3G23390.1	#N/A
Ro03_G13383	39530830	AT1G29630.2	#N/A
Ro03_G13384	39525075	AT1G29640.1	#N/A
Ro03_G33073	39514451	AT4G18070.1	#N/A
Ro03_G13386	39511001	AT5G46460.1	#N/A
Ro03_G13388	39493474	AT4G18100.1	#N/A
Ro03_G13389	39487341	AT5G46420.1	#N/A
Ro03_G13390	39477230	AT1G29400.1	AML5 MEI2-like protein 5
Ro03_G13391	39474171	AT4G18130.1	PHYE phytochrome E
Ro03_G13392	39463494	AT4G18140.1	SSP4b SCP1-like small phosphatase 4b
Ro03_G13393	39458340	AT5G40240.1	UMAMIT40 Usually multiple acids move in
Ro03_G33065	39451101	AT5G46400.1	AT PRP39-2
Ro03_G13396	39435430	AT1G29390.1	COR314-TM2 cold regulated 314 thylakoid m
Ro03_G13397	39433612	AT1G29380.1	#N/A
Ro03_G13399	39419161	AT5G46390.1	#N/A
Ro03_G13400	39410636	AT1G29350.1	#N/A
Ro03_G13401	39399537	AT1G29830.1	#N/A
Ro03_G13402	39397344	AT1G60970.1	#N/A
Ro03_G13403	39393414	AT1G29810.1	#N/A
Ro03_G13404	39390587	AT1G29790.1	#N/A
Ro03_G13405	39387400	AT1G29850.1	#N/A
Ro03_G13406	39383699	#N/A	#N/A
Ro03_G33069	39352602	#N/A	#N/A
Ro03_G13410	39348351	#N/A	#N/A
Ro03_G13411	39340727	AT4G18160.1	ATKCO6 CA2+ ACTIVATED OUTWARD RECTIFYING K+ C
Ro03_G13413	39334820	AT1G29860.1	ATWRKY71 WRKY DNA-BINDING PROTEIN 71
Ro03_G13414	39325065	AT1G29890.1	RWA4 REDUCED WALL ACETYLATION 4
Ro03_G13415	39322360	AT4G18220.1	#N/A
Ro03_G13420	39299642	AT4G18240.1	ATSS4 ARABIDOPSIS THALIANA STARCH SYNTHASE 4
Ro03_G13424	39290744	AT2G34430.1	LHB1B1 light-harvesting chlorophyll-protein c
Ro03_G13423	39286625	AT5G46330.1	FLS2 FLAGELLIN-SENSITIVE 2
Ro03_G13428	39271954	AT1G29950.1	#N/A
Ro03_G13430	39252680	AT1G23465.1	#N/A
Ro03_G33063	39246234	#N/A	#N/A
Ro03_G13434	39236667	#N/A	#N/A
Ro03_G13435	39233293	#N/A	#N/A
Ro03_G13436	39229895	AT2G34450.1	#N/A
Ro03_G13437	39225912	AT5G46290.1	KAS1 KETOACYL-ACP SYNTHASE 1
Ro03_G13439	39218127	AT5G46280.1	MCM3 MINICHROMOSOME MAINTENANCE 3
Ro03_G13440	39214944	AT2G34460.1	#N/A
Ro03_G13442	39204689	AT2G34470.1	PSKF109
Ro03_G13443	39196385	AT2G34480.1	#N/A
Ro03_G33055	39178992	AT2G16870.1	#N/A
Ro03_G13446	39171720	AT4G18270.1	ATTRANS11 ARABIDOPSIS THALIANA TRANSLOCA
Ro03_G13447	39166480	AT5G46250.1	AtLARP6a
Ro03_G13448	39162344	AT2G34510.1	#N/A
Ro03_G13449	39157710	AT1G29990.1	PFD6 prefoldin 6
Ro03_G13450	39145402	AT5G46240.1	KAT1 potassium channel in Arabidopsis thali
Ro03_G13451	39141434	AT1G30000.1	MNS3 alpha-mannosidase 3
Ro03_G13452	39140492	AT4G18335.1	#N/A
Ro03_G13454	39133243	AT5G08420.1	#N/A
Ro03_G17417	39109477	AT5G08420.1	#N/A
Ro03_G33056	39100102	AT3G50120.1	#N/A
Ro03_G17419	39096456	AT1G30010.1	nMAT1 nuclear maturase 1
Ro03_G17423	39088153	AT5G46220.1	#N/A
Ro03_G17424	39085036	AT2G34530.2	#N/A
Ro03_G17425	39082025	#N/A	#N/A
Ro03_G17427	39066636	#N/A	#N/A
Ro03_G17428	39054184	AT2G34555.1	ATGA2OX3 gibberellin 2-oxidase 3
Ro03_G17429	39032509	AT2G34560.1	AtCCP1
Ro03_G17430	39031219	AT1G30070.1	#N/A
Ro03_G17431	39029554	AT2G34580.1	#N/A
Ro03_G17434	39024002	AT1G30080.1	#N/A
Ro03_G17435	39007091	AT5G46210.1	ATCUL4
Ro03_G17437	39004379	AT1G30090.1	#N/A
Ro03_G17438	38979908	AT3G14440.1	ATNCED3
Ro03_G17439	38962837	AT2G34590.1	#N/A
Ro03_G17440	38960217	AT1G30130.1	#N/A
Ro03_G17441	38950138	AT1G30135.1	JAZ8 jasmonate-zim-domain protein 8
Ro03_G33049	38933035	AT3G14420.1	GOX1 glycolate oxidase 1
Ro03_G17443	38929061	AT4G39400.1	ATBRI1
Ro03_G17445	38914268	AT4G18372.1	#N/A
Ro03_G17446	38908844	AT5G46190.1	#N/A
Ro03_G17447	38900186	AT5G46180.1	DELTA-OAT ornithine-delta-aminotransfera
Ro03_G17449	38888011	AT5G46170.1	#N/A
Ro03_G33035	38875606	AT4G18390.1	TCP2
Ro03_G17451	38874159	#N/A	#N/A
Ro03_G17458	38818654	AT1G72280.1	AERO1 endoplasmic reticulum oxidoreductins 1
Ro03_G17459	38815747	AT4G18400.1	#N/A
Ro03_G17460	38812515	AT1G65030.1	#N/A
Ro03_G17461	38810044	AT1G09410.1	#N/A
Ro03_G17462	38793118	AT5G46150.1	#N/A
Ro03_G27476	38778940	AT1G30260.1	#N/A
Ro03_G27479	38770179	AT2G46440.1	ATCNGC11 cyclic nucleotide-gated channe
Ro03_G33052	38725921	AT5G53130.1	ATCNGC1 CYCLIC NUCLEOTIDE-GATED CHANNEL 1
Ro03_G15310	38716092	AT1G30270.1	ATCIPK23
Ro03_G15311	38708353	AT1G17210.1	ATILP1 ARABIDOPSIS IAP-LIKE PROTEIN
Ro03_G15312	38705112	AT2G34620.1	#N/A
Ro03_G15313	38690599	AT1G01940.1	#N/A
Ro03_G15317	38646979	AT2G34630.1	GPPS GERANYLPYROPHOSPHATE SYNTHASE
Ro03_G15321	38612437	AT2G34630.1	GPPS GERANYLPYROPHOSPHATE SYNTHASE
Ro03_G15322	38605723	AT1G75100.1	JAC1 J-domain protein required for chloropl
Ro03_G15323	38596609	AT1G30290.1	#N/A
Ro03_G15324	38592163	AT1G30300.1	#N/A
Ro03_G15325	38587750	#N/A	#N/A
Ro03_G15326	38577831	AT1G30320.1	#N/A
Ro03_G33037	38569470	AT1G30330.1	ARF6 auxin response factor 6
Ro03_G15328	38551851	AT2G34640.1	HMR HEMERA
Ro03_G15329	38545504	AT4G21060.1	AtGALT2
Ro03_G15331	38530308	AT1G30360.1	ERD4 early-responsive to dehydration 4
Ro03_G15332	38527533	AT1G30370.1	DLAH DAD1-like acylhydrolase
Ro03_G15334	38505990	AT2G20340.1	AAS aromatic aldehyde synthase
Ro03_G33038	38500998	AT5G19480.1	#N/A
Ro03_G15338	38491690	AT2G20340.1	AAS aromatic aldehyde synthase
Ro03_G15339	38486204	AT5G14360.1	#N/A
Ro03_G15340	38483079	AT4G21065.1	#N/A
Ro03_G15341	38476369	AT4G21070.1	ATBRCA1 ARABIDOPSIS THALIANA BREAST CANCER SUS
Ro03_G15342	38474597	AT4G03620.1	#N/A
Ro03_G15343	38458369	AT4G05460.1	#N/A
Ro03_G33080	38456946	#N/A	#N/A
Ro03_G33078	38455542	AT1G11410.1	#N/A
Ro03_G33076	38452473	AT4G21390.1	B120
Ro03_G33079	38437247	AT4G05470.1	#N/A
Ro03_G33077	38433819	AT4G27300.1	#N/A
Ro03_G24838	38411091	AT4G05460.1	#N/A
Ro03_G24836	38403771	AT2G34650.1	ABR ABRUPTUS
Ro03_G24833	38388770	AT4G05430.1	#N/A
Ro03_G24832	38386464	AT1G30380.1	PSAK photosystem I subunit K
Ro03_G24831	38371816	AT4G21100.1	DDB1B damaged DNA binding protein 1B
Ro03_G24830	38336279	AT1G30410.1	ABCC12 ATP-binding cassette C12
Ro03_G33032	38317943	AT2G34670.1	#N/A
Ro03_G16179	38316839	#N/A	#N/A
Ro03_G33033	38302695	AT1G30440.1	#N/A
Ro03_G16175	38290697	AT1G30450.1	ATCCC1
Ro03_G16172	38275637	AT4G21120.1	AAT1 amino acid transporter 1
Ro03_G16171	38260684	AT2G34680.1	AIR9 AUXIN-INDUCED IN ROOT CULTURES 9
Ro03_G16170	38256805	AT2G34690.1	ACD11 ACCELERATED CELL DEATH 11
Ro03_G16168	38248973	#N/A	#N/A
Ro03_G16167	38248036	#N/A	#N/A
Ro03_G33028	38243498	#N/A	#N/A
Ro03_G16166	38233779	AT1G30460.1	ATCPSF30 ARABIDOPSIS THALIANA CLEAVAGE
Ro03_G33026	38229288	AT4G21130.1	EMB2271 EMBRYO DEFECTIVE 2271
Ro03_G16164	38219410	AT1G30470.1	#N/A
Ro03_G16163	38215879	AT1G30480.1	DRT111 DNA-DAMAGE-REPAIR/TOLERATION PROTEIN 1
Ro03_G16161	38207819	AT3G29130.1	#N/A
Ro03_G16159	38196956	AT2G34710.1	ATHB-14
Ro03_G16158	38183257	AT1G30500.2	NF-YA7 "nuclear factor Y, subunit A7"
Ro03_G16157	38175995	AT1G30510.1	ATRFNR2 root FNR 2
Ro03_G16155	38164623	AT4G21160.1	AGD12 ARF-GAP domain 12
Ro03_G16156	38162723	#N/A	#N/A
Ro03_G33022	38144330	AT4G04955.1	ALN allantoinase
Ro03_G16152	38114089	#N/A	#N/A
Ro03_G16150	38092327	#N/A	#N/A
Ro03_G16148	38083503	AT1G30570.1	HERK2 hercules receptor kinase 2
Ro03_G16147	38080447	AT4G26850.1	VTC2 vitamin c defective 2
Ro03_G16146	38072581	AT1G30580.1	#N/A
Ro03_G16145	38062828	AT4G20940.1	GHR1 GUARD CELL HYDROGEN PEROXIDE-RESISTANT
Ro03_G16143	38055442	AT4G20910.1	CRM2 CORYMBOSA 2
Ro03_G16142	38051409	AT3G05950.1	#N/A
Ro03_G16141	38046599	AT3G51280.1	#N/A
Ro03_G16140	38039615	AT5G63890.1	ATHDH histidinol dehydrogenase
Ro03_G33050	38033307	AT1G62020.1	#N/A
Ro03_G16137	38013019	AT1G21240.1	WAK3 wall associated kinase 3
Ro03_G16135	37973535	AT1G62020.1	#N/A
Ro03_G17144	37945767	AT1G19390.1	#N/A
Ro03_G33057	37934489	AT1G19390.1	#N/A
Ro03_G17147	37910504	AT1G21270.1	WAK2 wall-associated kinase 2
Ro03_G33043	37873230	AT1G21240.1	WAK3 wall associated kinase 3
Ro03_G17154	37861986	AT5G53130.1	ATCNGC1 CYCLIC NUCLEOTIDE-GATED CHANNEL 1
Ro03_G17156	37819883	AT1G21240.1	WAK3 wall associated kinase 3
Ro03_G33041	37806299	AT5G38940.1	#N/A
Ro03_G17159	37802747	AT5G44340.1	TUB4 tubulin beta chain 4
Ro03_G17161	37788743	AT4G20880.1	#N/A
Ro03_G17163	37776199	AT2G34770.1	ATFAH1 ARABIDOPSIS FATTY ACID HYDROXYLASE 1
Ro03_G17164	37768336	#N/A	#N/A
Ro03_G17166	37762241	AT2G34790.1	EDA28 EMBRYO SAC DEVELOPMENT ARREST 28
Ro03_G17170	37754288	#N/A	#N/A
Ro03_G17173	37722599	AT4G20820.1	#N/A
Ro03_G33108	37705355	AT4G20840.1	#N/A
Ro03_G17175	37696779	#N/A	#N/A
Ro03_G17182	37659650	AT4G18570.1	#N/A
Ro03_G33012	37633911	AT1G11280.1	#N/A
Ro03_G15817	37609807	AT3G23290.2	LSH4 LIGHT SENSITIVE HYPOCOTYLS 4
Ro03_G15816	37600473	AT2G20470.1	#N/A
Ro03_G15815	37586963	AT2G34830.1	AtWRKY35 WRKY DNA-BINDING PROTEIN 35
Ro03_G15814	37580472	AT4G20760.1	#N/A
Ro03_G15813	37576590	AT4G20770.1	#N/A
Ro03_G15812	37572746	AT5G44450.1	#N/A
Ro03_G15809	37557200	AT1G30660.1	#N/A
Ro03_G15808	37553621	AT5G45390.1	CLPP4 CLP protease P4
Ro03_G33017	37540663	AT1G30680.1	#N/A
Ro03_G15806	37538140	AT4G09160.1	#N/A
Ro03_G15805	37535483	AT1G11770.1	#N/A
Ro03_G33016	37526405	AT1G30690.1	#N/A
Ro03_G15803	37521278	AT1G11770.1	#N/A
Ro03_G15799	37503253	AT4G20840.1	#N/A
Ro03_G15796	37485522	AT1G30610.1	EMB2279 EMBRYO DEFECTIVE 2279
Ro03_G33009	37482240	AT1G30610.1	EMB2279 EMBRYO DEFECTIVE 2279
Ro03_G33007	37480339	AT4G36130.1	#N/A
Ro03_G15793	37467488	AT1G30620.1	HSR8 HIGH SUGAR RESPONSE8
Ro03_G15792	37464113	AT2G34840.1	#N/A
Ro03_G15787	37434698	AT1G30630.1	#N/A
Ro03_G15786	37414007	AT2G34840.1	#N/A
Ro03_G15784	37412068	AT4G20390.1	#N/A
Ro03_G33008	37408093	AT4G20380.1	LSD1 LESION SIMULATING DISEASE
Ro03_G15782	37405568	AT1G06440.1	#N/A
Ro03_G15781	37388564	AT4G20400.1	JMJ14 JUMONJI 14
Ro03_G15778	37382196	AT4G20410.1	GAMMA-SNAP GAMMA-SOLUBLE NSF ATTACHMENT P
Ro03_G15776	37372657	AT4G20430.1	#N/A
Ro03_G15774	37364148	AT5G44520.1	#N/A
Ro03_G15773	37362508	AT2G42850.1	CYP718 "cytochrome P450, family 718"
Ro03_G33003	37355776	AT2G42850.1	CYP718 "cytochrome P450, family 718"
Ro03_G15771	37351450	AT5G44560.1	VPS2.2
Ro03_G33005	37343727	AT5G11720.1	#N/A
Ro03_G33004	37336622	AT5G11720.1	#N/A
Ro03_G33006	37328518	AT5G11720.1	#N/A
Ro03_G15770	37321692	#N/A	#N/A
Ro03_G15769	37318051	AT5G55810.1	AtNMNAT nicotinate/nicotinamide mononucleotide
Ro03_G15767	37300617	AT2G39220.1	PLA IIB
Ro03_G15765	37296528	#N/A	#N/A
Ro03_G15766	37295703	AT1G04290.1	#N/A
Ro03_G15764	37290611	AT1G31335.1	#N/A
Ro03_G32988	37283364	AT1G08050.1	#N/A
Ro03_G32986	37278350	AT1G08050.1	#N/A
Ro03_G32985	37215739	AT3G54780.1	#N/A
Ro03_G32983	37203775	#N/A	#N/A
Ro03_G10895	37193201	AT1G31330.1	PSAF photosystem I subunit F
Ro03_G10894	37190226	AT1G31320.1	LBD4 LOB domain-containing protein 4
Ro03_G10893	37178562	AT1G80245.1	#N/A
Ro03_G10891	37155298	AT5G08695.1	#N/A
Ro03_G10889	37150215	AT2G43000.1	ANAC042 NAC domain containing protein 42
Ro03_G10887	37141682	AT5G45170.1	#N/A
Ro03_G10881	37071821	AT5G45160.1	RL2 RHD-like2
Ro03_G10880	37066185	AT1G31310.1	#N/A
Ro03_G10879	37059443	AT4G19640.1	ARA-7
Ro03_G10877	37044884	AT1G31300.1	#N/A
Ro03_G10876	37038859	AT4G19650.1	#N/A
Ro03_G10875	37034642	AT5G45110.1	ATNPR3
Ro03_G10874	37025312	#N/A	#N/A
Ro03_G10872	37013287	AT1G31280.1	AGO2 argonaute 2
Ro03_G10871	37005167	AT3G05320.1	#N/A
Ro03_G10870	37001322	AT4G19670.1	#N/A
Ro03_G32992	36975858	AT5G45100.1	BRG1 BOI-related gene 1
Ro03_G10866	36956411	#N/A	#N/A
Ro03_G10865	36952995	AT2G33120.1	ATVAMP722 ARABIDOPSIS THALIANA VESICLE-A
Ro03_G10864	36947055	AT4G20010.1	OSB2 ORGANELLAR SINGLE-STRANDED DNA BINDING
Ro03_G10863	36940310	AT5G37340.1	#N/A
Ro03_G10862	36917153	AT5G53130.1	ATCNGC1 CYCLIC NUCLEOTIDE-GATED CHANNEL 1
Ro03_G10860	36906980	#N/A	#N/A
Ro03_G10859	36894693	AT2G28260.1	ATCNGC15 cyclic nucleotide-gated channe
Ro03_G10857	36867639	AT5G22100.1	#N/A
Ro03_G10854	36855967	AT2G39440.1	#N/A
Ro03_G10853	36841980	AT4G19840.1	ATPP2-A1 phloem protein 2-A1
Ro03_G10852	36837601	AT1G31190.1	IMPL1 myo-inositol monophosphatase like 1
Ro03_G10851	36833999	#N/A	#N/A
Ro03_G10850	36829427	AT4G15000.1	#N/A
Ro03_G10849	36824788	AT4G19860.1	#N/A
Ro03_G10848	36820381	AT5G45040.1	CYTC6A cytochrome c6A
Ro03_G10847	36805642	AT2G35155.1	#N/A
Ro03_G10846	36797635	AT4G19880.1	#N/A
Ro03_G10843	36793553	AT2G35150.1	EXL7 EXORDIUM LIKE 7
Ro03_G10842	36788814	AT4G19900.1	#N/A
Ro03_G10841	36787222	#N/A	#N/A
Ro03_G10840	36783387	AT2G35140.1	#N/A
Ro03_G10839	36768457	AT5G08470.1	EMB2817 EMBRYO DEFECTIVE 2817
Ro03_G10837	36762628	AT2G35120.1	#N/A
Ro03_G32975	36759074	AT2G35130.1	#N/A
Ro03_G10835	36753907	AT1G16470.1	PAB1 proteasome subunit PAB1
Ro03_G10834	36745697	AT3G14290.1	PAE2 20S proteasome alpha subunit E2
Ro03_G10831	36728783	AT5G18820.1	Cpn60alpha2 chaperonin-60alpha2
Ro03_G05873	36661845	AT2G35110.2	GRL GNARLED
Ro03_G05872	36659890	AT1G31170.1	ATSRX SULFIREDOXIN
Ro03_G05871	36655998	AT1G31160.1	HINT 2 HISTIDINE TRIAD NUCLEOTIDE-BINDING 2
Ro03_G05867	36615663	AT2G35100.1	ARAD1 ARABINAN DEFICIENT 1
Ro03_G05863	36601179	AT4G19950.1	#N/A
Ro03_G05862	36584947	AT3G12800.1	DECR
Ro03_G05861	36569029	AT1G31120.1	KUP10 K+ uptake permease 10
Ro03_G05859	36548571	AT1G31120.1	KUP10 K+ uptake permease 10
Ro03_G05857	36542184	#N/A	#N/A
Ro03_G05855	36531212	AT1G16270.1	#N/A
Ro03_G05854	36523324	AT5G08720.1	#N/A
Ro03_G05853	36509026	AT5G44800.1	CHR4 chromatin remodeling 4
Ro03_G05852	36507481	#N/A	#N/A
Ro03_G05851	36497641	#N/A	#N/A
Ro03_G33013	36493806	AT4G15090.1	FAR1 FAR-RED IMPAIRED RESPONSE 1
Ro03_G05850	36492282	AT1G70190.1	#N/A
Ro03_G05848	36487796	AT2G35035.1	URED urease accessory protein D
Ro03_G05847	36475875	AT1G31070.2	GlcNAc1pUT1 N-acetylglucosamine-1-phosphat
Ro03_G05846	36458651	AT3G58140.1	#N/A
Ro03_G05845	36445542	AT1G31040.1	#N/A
Ro03_G32968	36430735	AT1G30910.1	#N/A
Ro03_G32971	36428140	AT3G11080.1	AtRLP35 receptor like protein 35
Ro03_G32969	36420264	AT2G34930.1	#N/A
Ro03_G05843	36409083	AT5G44790.1	HMA7
Ro03_G05842	36401449	AT4G15120.1	#N/A
Ro03_G05841	36395902	AT4G20030.1	#N/A
Ro03_G05840	36390139	AT2G32260.1	ATCCT1
Ro03_G05839	36389547	#N/A	#N/A
Ro03_G05838	36381519	AT5G05280.1	DAF DEFECTIVE IN ANTHER DEHISCENCE1- ( DAD
Ro03_G05837	36372205	AT4G20050.1	QRT3 QUARTET 3
Ro03_G05835	36355955	AT4G20070.1	AAH allantoate amidohydrolase
Ro03_G05832	36314600	AT2G04032.1	ZIP7 zinc transporter 7 precursor
Ro03_G05831	36309762	AT1G05780.1	#N/A
Ro03_G05830	36304989	AT1G30970.1	SUF4 suppressor of FRIGIDA4
Ro03_G05829	36300232	AT1G30960.1	#N/A
Ro03_G05828	36297979	AT1G30950.1	UFO UNUSUAL FLORAL ORGANS
Ro03_G05827	36292538	AT1G07260.1	UGT71C3 UDP-glucosyl transferase 71C3
Ro03_G05826	36284567	AT5G44740.2	POLH Y-family DNA polymerase H
Ro03_G05825	36281216	AT3G22110.1	PAC1 20S proteasome alpha subunit C1
Ro03_G05824	36277235	AT5G44730.1	#N/A
Ro03_G05823	36275710	#N/A	#N/A
Ro03_G05822	36273258	AT2G40980.1	#N/A
Ro03_G05821	36269739	AT3G47630.2	#N/A
Ro03_G32960	36259188	AT2G34960.1	CAT5 cationic amino acid transporter 5
Ro03_G05818	36251625	AT1G30910.1	#N/A
Ro03_G32959	36242027	AT2G34930.1	#N/A
Ro03_G32957	36234714	AT1G07390.1	AtRLP1 receptor like protein 1
Ro03_G05817	36220624	AT5G44720.1	#N/A
Ro03_G32961	36219414	AT2G34930.1	#N/A
Ro03_G32962	36218496	AT2G34930.1	#N/A
Ro03_G05816	36215139	AT1G30910.1	#N/A
Ro03_G05815	36212128	AT3G57430.1	OTP84 ORGANELLE TRANSCRIPT PROCESSING 84
Ro03_G05814	36209971	AT5G44710.1	#N/A
Ro03_G05813	36204913	AT4G20130.1	PTAC14 plastid transcriptionally active 14
Ro03_G05812	36201741	#N/A	#N/A
Ro03_G05811	36195276	AT1G30900.1	BP80-3;3 binding protein of 80 kDa 3;3
Ro03_G05810	36191891	AT1G30880.1	#N/A
Ro03_G32958	36189430	AT5G45680.1	ATFKBP13 FK506 BINDING PROTEIN 13
Ro03_G05808	36186139	AT2G44880.1	AHG11 ABA hypersensitive germination 11
Ro03_G05805	36171888	AT5G17370.1	#N/A
Ro03_G05803	36168321	#N/A	#N/A
Ro03_G05801	36155765	AT4G20140.1	GSO1 GASSHO1
Ro03_G05800	36152188	AT4G20150.1	#N/A
Ro03_G05799	36144533	AT1G30860.1	#N/A
Ro03_G05798	36136597	AT5G44680.1	#N/A
Ro03_G05797	36132760	AT5G58420.1	#N/A
Ro03_G05795	36125288	AT4G20170.1	GALS3 galactan synthase 3
Ro03_G05794	36116432	AT5G44650.1	AtCEST Arabidopsis thaliana chloroplast prote
Ro03_G05793	36106985	AT1G30840.1	ATPUP4 purine permease 4
Ro03_G05792	36096869	AT5G44635.1	MCM6 MINICHROMOSOME MAINTENANCE 6
Ro03_G05791	36091667	AT4G20260.1	ATPCAP1 ARABIDOPSIS THALIANA PLASMA-MEMBRANE A
Ro03_G05790	36086523	AT2G34900.1	GTE01
Ro03_G05788	36084319	AT3G13440.1	#N/A
Ro03_G05789	36080729	AT5G13010.1	EMB3011 embryo defective 3011
Ro03_G05787	36069960	AT4G20270.1	BAM3 BARELY ANY MERISTEM 3
Ro03_G05786	36064334	AT4G20280.1	TAF11 TBP-associated factor 11
Ro03_G05785	36062696	#N/A	#N/A
Ro03_G05784	36057825	AT4G20300.2	#N/A
Ro03_G32963	36041908	AT2G34930.1	#N/A
Ro03_G32964	36036440	AT1G47890.1	AtRLP7 receptor like protein 7
Ro03_G05783	36031787	AT1G30825.1	ARPC2A ACTIN-RELATED PROTEIN C2A
Ro03_G05782	36027335	AT4G20310.1	#N/A
Ro03_G05781	35994072	AT4G20320.1	#N/A
Ro03_G05780	35989208	AT5G44600.1	#N/A
Ro03_G05778	35968906	AT1G30820.1	#N/A
Ro03_G05777	35961063	AT1G54350.1	ABCD2 ATP-binding cassette D2
Ro03_G05776	35953009	AT3G12680.1	HUA1 ENHANCER OF AG-4 1
Ro03_G05773	35941596	AT5G04620.2	ATBIOF biotin F
Ro03_G05772	35927546	#N/A	#N/A
Ro03_G05771	35926484	AT2G21820.1	#N/A
Ro03_G05770	35923633	AT3G12685.1	#N/A
Ro03_G05769	35915849	AT1G79540.1	#N/A
Ro03_G05767	35907177	AT1G54340.1	ICDH isocitrate dehydrogenase
Ro03_G05766	35897567	AT3G12690.1	AGC1.5 AGC kinase 1.5
Ro03_G05765	35894803	AT1G79260.1	#N/A
Ro03_G05764	35892792	AT1G07950.1	MED22B
Ro03_G05762	35885373	AT3G12700.1	NANA NANA
Ro03_G05760	35875673	AT1G79270.1	ECT8 evolutionarily conserved C-terminal re
Ro03_G32933	35855338	AT1G79280.1	AtTPR TRANSLOCATED PROMOTER REGION
Ro03_G05758	35848397	#N/A	#N/A
Ro03_G05755	35832839	AT3G12710.1	#N/A
Ro03_G05754	35826223	AT2G29500.1	#N/A
Ro03_G05752	35821082	AT1G79340.1	AtMC4 metacaspase 4
Ro03_G05751	35805497	AT1G79350.1	EMB1135 embryo defective 1135
Ro03_G05750	35796395	AT1G15510.1	ATECB2 ARABIDOPSIS EARLY CHLOROPLAST BIOGENES
Ro03_G05749	35792701	AT1G79380.1	RGLG4 RING DOMAIN LIGASE 4
Ro03_G05748	35790382	AT1G79390.1	#N/A
Ro03_G05747	35782019	AT3G17730.1	anac057 NAC domain containing protein 57
Ro03_G05746	35778358	AT3G12720.1	ATMYB67 myb domain protein 67
Ro03_G05744	35766657	AT1G53645.1	#N/A
Ro03_G05743	35758381	AT1G79360.1	ATOCT2 organic cation/carnitine transporter 2
Ro03_G05742	35747931	AT5G43330.1	c-NAD-MDH2 cytosolic-NAD-dependent malate
Ro03_G05741	35745086	AT1G16390.1	ATOCT3 organic cation/carnitine transporter 3
Ro03_G05739	35738485	AT4G18180.1	#N/A
Ro03_G05737	35730859	AT1G27690.1	#N/A
Ro03_G05736	35724544	AT1G79430.2	APL ALTERED PHLOEM DEVELOPMENT
Ro03_G05735	35705005	AT1G79440.1	ALDH5F1 aldehyde dehydrogenase 5F1
Ro03_G32931	35696738	AT1G54320.1	#N/A
Ro03_G05733	35692214	AT1G54310.2	#N/A
Ro03_G05732	35689101	AT1G16740.1	#N/A
Ro03_G05731	35683053	AT1G79460.1	ATKS ARABIDOPSIS THALIANA ENT-KAURENE SYNTH
Ro03_G32921	35655056	AT4G08850.1	#N/A
Ro03_G32920	35608147	AT4G08850.1	#N/A
Ro03_G32919	35589652	#N/A	#N/A
Ro03_G32918	35587926	#N/A	#N/A
Ro03_G15823	35547701	AT1G79470.1	#N/A
Ro03_G15824	35543028	AT1G79490.1	EMB2217 embryo defective 2217
Ro03_G32928	35534727	AT1G79500.1	AtkdsA1
Ro03_G15827	35530046	AT3G22980.1	#N/A
Ro03_G15829	35519045	AT1G16330.1	CYCB3;1 cyclin b3;1
Ro03_G15830	35516694	AT1G79510.1	#N/A
Ro03_G15833	35494663	AT4G02220.1	#N/A
Ro03_G32927	35491987	AT1G16310.1	#N/A
Ro03_G15835	35484581	AT3G12760.1	#N/A
Ro03_G32929	35481078	AT3G12760.1	#N/A
Ro03_G32936	35467191	AT4G08850.1	#N/A
Ro03_G32935	35455208	AT1G16300.1	GAPCP-2 glyceraldehyde-3-phosphate dehydrogena
Ro03_G15839	35443729	AT1G16290.1	#N/A
Ro03_G15840	35440716	AT4G39830.1	#N/A
Ro03_G15841	35427349	AT1G16270.1	#N/A
Ro03_G15842	35425071	AT3G03450.1	RGL2 RGA-like 2
Ro03_G15843	35422427	#N/A	#N/A
Ro03_G15844	35419474	AT1G56170.1	ATHAP5B
Ro03_G15847	35404190	AT1G16280.1	AtRH36 Arabidopsis thaliana RNA helicase 36
Ro03_G32937	35402633	AT3G12800.1	DECR
Ro03_G15851	35395313	AT3G12800.1	DECR
Ro03_G15850	35385604	AT1G79560.1	EMB1047 EMBRYO DEFECTIVE 1047
Ro03_G15852	35364114	AT4G16340.1	SPK1 SPIKE1
Ro03_G32923	35357355	AT1G65790.1	ARK1 receptor kinase 1
Ro03_G32924	35353685	AT3G06030.1	ANP3 NPK1-related protein kinase 3
Ro03_G32926	35312821	AT5G56075.1	#N/A
Ro03_G15853	35307723	AT1G56180.1	#N/A
Ro03_G15855	35297090	AT1G56190.1	#N/A
Ro03_G15859	35280159	AT1G79230.1	ATMST1
Ro03_G15861	35269346	AT1G79220.1	#N/A
Ro03_G33000	35256625	AT4G23180.1	CRK10 cysteine-rich RLK (RECEPTOR-like prote
Ro03_G15862	35250299	AT1G79220.1	#N/A
Ro03_G32998	35238516	AT1G11350.1	CBRLK1 CALMODULIN-BINDING RECEPTOR-LIKE PROTE
Ro03_G23268	35224421	AT3G20730.1	#N/A
Ro03_G32999	35221348	AT1G65800.1	ARK2 receptor kinase 2
Ro03_G32997	35209260	AT1G65790.1	ARK1 receptor kinase 1
Ro03_G33001	35206918	AT4G21380.1	ARK3 receptor kinase 3
Ro03_G32947	35182587	AT3G16030.1	CES101 CALLUS EXPRESSION OF RBCS 101
Ro03_G32946	35181711	AT1G67520.1	#N/A
Ro03_G32945	35152851	AT1G65790.1	ARK1 receptor kinase 1
Ro03_G23264	35134014	AT3G12810.1	chr13
Ro03_G05422	35113903	AT5G60990.1	#N/A
Ro03_G05423	35107153	AT1G16480.1	#N/A
Ro03_G05424	35104186	AT1G79200.1	SCI1 stigma/style cell-cycle inhibitor 1
Ro03_G32944	35098531	AT4G11290.1	#N/A
Ro03_G05428	35082497	AT1G79190.1	#N/A
Ro03_G05429	35076459	AT1G79180.1	ATMYB63 MYB DOMAIN PROTEIN 63
Ro03_G05430	35050709	AT1G16500.1	#N/A
Ro03_G05431	35037390	AT1G79150.1	#N/A
Ro04_G36095	1794	AT4G16180.2	transmembrane protein;computational_description
Ro04_G19931	10618	AT5G49480.1	Ca2+-binding protein 1;curator_summary
Ro04_G19930	12056	AT5G49010.1	DNA replication protein-like protein;curator_summary
Ro04_G19922	34325	#N/A	#N/A
Ro04_G19920	40415	AT3G17100.1	sequence-specific DNA binding transcription factor;Alias
Ro04_G23437	54640	AT5G08410.1	ferredoxin/thioredoxin reductase subunit A (variable subunit) 2;symbol
Ro04_G23438	56104	AT5G23430.1	Transducin/WD40 repeat-like superfamily protein;computational_description
Ro04_G36097	78265	AT5G08380.1	alpha-galactosidase 1;symbol
Ro04_G23440	82097	AT5G08570.1	Pyruvate kinase family protein;computational_description
Ro04_G23441	91618	AT5G08540.1	ribosomal RNA small subunit methyltransferase J;computational_description
Ro04_G23442	97768	AT5G23395.1	Cox19-like CHCH family protein;curator_summary
Ro04_G23443	100015	AT5G23390.1	polygalacturonase inhibitor (DUF639);computational_description
Ro04_G23444	107524	AT3G52350.1	D111/G-patch domain-containing protein;computational_description
Ro04_G23445	113404	AT1G50380.1	Prolyl oligopeptidase family protein;computational_description
Ro04_G23446	127396	AT3G19990.1	E3 ubiquitin-protein ligase;computational_description
Ro04_G23447	130573	AT1G20696.1	high mobility group B3;curator_summary
Ro04_G23448	134585	AT1G50410.1	SNF2 domain-containing protein / helicase domain-containing protein / zinc finger protein-like protein;curator_summary
Ro04_G23449	145273	AT3G20015.1	Eukaryotic aspartyl protease family protein;computational_description
Ro04_G23451	152008	AT3G20020.1	protein arginine methyltransferase 6;symbol
Ro04_G23452	159470	AT3G20000.1	translocase of the outer mitochondrial membrane 40;curator_summary
Ro04_G23454	164547	AT4G24370.1	hypothetical protein;Alias
Ro04_G23453	165555	AT5G08580.1	Calcium-binding EF hand family protein;computational_description
Ro04_G36099	169215	AT2G40730.1	kinase family with ARM repeat domain-containing protein;symbol
Ro04_G23456	179973	AT5G08520.1	Duplicated homeodomain-like superfamily protein;computational_description
Ro04_G23457	188553	AT5G08350.1	GRAM domain-containing protein / ABA-responsive protein-like protein;computational_description
Ro04_G12477	205112	AT5G23340.1	RNI-like superfamily protein;computational_description
Ro04_G36102	209487	AT3G19970.1	alpha/beta-Hydrolases superfamily protein;computational_description
Ro04_G36103	212135	AT5G23330.1	Nucleotidylyl transferase superfamily protein;computational_description
Ro04_G12480	215633	AT3G19960.1	myosin 1;curator_summary
Ro04_G12483	235273	AT3G20800.1	Cell differentiation%2C Rcd1-like protein;computational_description
Ro04_G12484	240894	AT5G23320.1	S-isoprenylcysteine O-methyltransferase;curator_summary
Ro04_G36101	248352	AT4G05190.1	kinesin 5;curator_summary
Ro04_G12485	259659	#N/A	#N/A
Ro04_G36100	263176	AT3G57200.1	glycosyltransferase-like protein;computational_description
Ro04_G12487	265773	AT5G23290.1	prefoldin 5;symbol
Ro04_G12488	266853	AT5G23240.1	DNAJ heat shock N-terminal domain-containing protein;Alias
Ro04_G12490	270343	AT5G23230.1	nicotinamidase 2;symbol
Ro04_G12492	271457	AT5G08280.1	hydroxymethylbilane synthase;curator_summary
Ro04_G12489	274122	AT5G23210.1	serine carboxypeptidase-like 34;symbol
Ro04_G12493	280764	AT5G23200.1	C5orf35;computational_description
Ro04_G12494	285199	AT5G23190.1	cytochrome P450%2C family 86%2C subfamily B%2C polypeptide 1;curator_summary
Ro04_G12495	288452	AT1G17330.1	Metal-dependent phosphohydrolase;computational_description
Ro04_G12496	292110	AT5G23160.1	transmembrane protein;computational_description
Ro04_G12497	295928	AT5G08200.1	peptidoglycan-binding LysM domain-containing protein;computational_description
Ro04_G12498	304559	AT5G23150.1	Tudor/PWWP/MBT domain-containing protein;curator_summary
Ro04_G36104	317815	AT5G23140.1	nuclear-encoded CLP protease P7;curator_summary
Ro04_G12501	321430	AT5G23120.1	photosystem II stability/assembly factor%2C chloroplast (HCF136);curator_summary
Ro04_G12503	327354	AT5G23110.1	Zinc finger%2C C3HC4 type (RING finger) family protein;computational_description
Ro04_G12505	365225	AT3G18610.1	nucleolin like 2;curator_summary
Ro04_G12506	371164	AT3G19740.1	P-loop containing nucleoside triphosphate hydrolases superfamily protein;computational_description
Ro04_G12507	385314	AT3G17820.1	glutamine synthetase 1.3;curator_summary
Ro04_G12511	399589	AT3G13530.1	mitogen-activated protein kinase kinase kinase 7;curator_summary
Ro04_G12512	416773	AT1G50200.1	Alanyl-tRNA synthetase;symbol
Ro04_G12513	427515	AT3G19780.1	hypothetical protein;computational_description
Ro04_G12514	433653	AT3G18620.1	DHHC-type zinc finger family protein;computational_description
Ro04_G36105	437263	AT5G36120.1	cofactor assembly%2C complex C (B6F);symbol
Ro04_G36108	438351	AT5G18362.1	#N/A
Ro04_G12516	441878	AT3G19820.1	cell elongation protein / DWARF1 / DIMINUTO (DIM);curator_summary
Ro04_G12517	446923	AT1G50260.1	N-terminal-transmembrane-C2 domain type 5.1;symbol
Ro04_G12518	454530	AT3G19840.1	pre-mRNA-processing protein 40C;curator_summary
Ro04_G12519	464760	AT1G50300.1	TBP-associated factor 15;symbol
Ro04_G12521	474824	#N/A	#N/A
Ro04_G12520	476496	AT3G19895.1	RING/U-box superfamily protein;computational_description
Ro04_G36107	482935	AT3G19900.1	hypothetical protein;computational_description
Ro04_G12524	486041	AT3G18630.1	uracil dna glycosylase;curator_summary
Ro04_G12525	488608	AT5G64520.1	homolog of X-ray repair cross complementing 2 (XRCC2);curator_summary
Ro04_G12526	491987	AT1G60860.1	ARF-GAP domain 2;curator_summary
Ro04_G12527	502683	#N/A	#N/A
Ro04_G12528	504731	AT1G31870.1	pre-mRNA-splicing factor of RES complex protein;computational_description
Ro04_G36111	516916	AT1G50200.1	Alanyl-tRNA synthetase;symbol
Ro04_G12530	525146	AT1G31870.1	pre-mRNA-splicing factor of RES complex protein;computational_description
Ro04_G12531	526799	AT2G29580.1	CCCH-type zinc fingerfamily protein with RNA-binding domain-containing protein;curator_summary
Ro04_G12533	539043	AT3G15810.1	LURP-one-like protein (DUF567);computational_description
Ro04_G12534	548335	AT4G21200.1	gibberellin 2-oxidase 8;curator_summary
Ro04_G12535	550545	#N/A	#N/A
Ro04_G12536	554144	#N/A	#N/A
Ro04_G12537	555696	AT1G60670.2	hypothetical protein (DUF3755);computational_description
Ro04_G12538	563119	#N/A	#N/A
Ro04_G12539	567441	AT1G10850.1	Leucine-rich repeat protein kinase family protein;computational_description
Ro04_G12540	574864	AT5G40210.1	nodulin MtN21 /EamA-like transporter family protein;curator_summary
Ro04_G36110	577644	#N/A	#N/A
Ro04_G12543	578509	AT2G33840.1	Tyrosyl-tRNA synthetase%2C class Ib%2C bacterial/mitochondrial;computational_description
Ro04_G12544	582852	AT3G02820.1	zinc knuckle (CCHC-type) family protein;computational_description
Ro04_G12545	586742	AT3G11920.1	glutaredoxin-like protein;computational_description
Ro04_G36112	592739	AT2G02220.1	phytosulfokin receptor 1;curator_summary
Ro04_G36113	611945	AT2G37770.2	NAD(P)-linked oxidoreductase superfamily protein;curator_summary
Ro04_G12548	617188	AT1G14520.1	myo-inositol oxygenase 1;curator_summary
Ro04_G12549	623445	AT2G02180.1	tobamovirus multiplication protein 3;curator_summary
Ro04_G12550	625032	#N/A	#N/A
Ro04_G12551	630722	AT2G02170.1	Remorin family protein;computational_description
Ro04_G12552	635491	AT2G02150.1	Tetratricopeptide repeat (TPR)-like superfamily protein;symbol
Ro04_G12553	638076	#N/A	#N/A
Ro04_G12555	643966	AT2G02148.1	PPR containing protein;computational_description
Ro04_G12556	647649	AT3G18420.1	Protein prenylyltransferase superfamily protein;Alias
Ro04_G12557	648975	AT5G54910.1	DEA(D/H)-box RNA helicase family protein;computational_description
Ro04_G12558	695611	AT5G13770.1	Pentatricopeptide repeat (PPR-like) superfamily protein;computational_description
Ro04_G12559	700092	AT4G26055.1	transmembrane protein;computational_description
Ro04_G00461	702765	AT2G02100.1	low-molecular-weight cysteine-rich 69;curator_summary
Ro04_G00458	710325	AT1G14570.1	UBX domain-containing protein;curator_summary
Ro04_G00457	720166	AT4G05170.1	basic helix-loop-helix (bHLH) DNA-binding superfamily protein;computational_description
Ro04_G00455	724879	AT2G02090.1	SNF2 domain-containing protein / helicase domain-containing protein;symbol
Ro04_G00454	738081	AT2G02070.1	indeterminate(ID)-domain 5;symbol
Ro04_G00453	746898	AT2G02070.1	indeterminate(ID)-domain 5;symbol
Ro04_G00452	754727	AT1G75010.1	GTP binding protein;curator_summary
Ro04_G00451	761227	AT1G14590.1	Nucleotide-diphospho-sugar transferase family protein;computational_description
Ro04_G00450	764026	AT4G32640.1	Sec23/Sec24 protein transport family protein;computational_description
Ro04_G36114	774240	AT1G09290.1	hypothetical protein;computational_description
Ro04_G00448	777895	AT2G40260.1	Homeodomain-like superfamily protein;computational_description
Ro04_G00447	795459	#N/A	#N/A
Ro04_G00445	799279	AT2G46280.1	TGF-beta receptor interacting protein 1;curator_summary
Ro04_G00443	802062	AT2G02040.1	peptide transporter 2;curator_summary
Ro04_G36123	812637	AT1G65960.2	glutamate decarboxylase 2;curator_summary
Ro04_G00440	818532	AT4G17260.1	Lactate/malate dehydrogenase family protein;computational_description
Ro04_G00439	820490	AT2G37870.1	Bifunctional inhibitor/lipid-transfer protein/seed storage 2S albumin superfamily protein;computational_description
Ro04_G00438	823087	AT1G14630.1	XRI1-like protein;computational_description
Ro04_G00437	826611	#N/A	#N/A
Ro04_G00436	830417	AT4G13420.1	high affinity K+ transporter 5;curator_summary
Ro04_G00435	834220	AT1G14660.1	Na+/H+ exchanger 8;curator_summary
Ro04_G00434	846853	AT2G01970.1	Endomembrane protein 70 protein family;computational_description
Ro04_G00432	855515	AT1G59950.1	NAD(P)-linked oxidoreductase superfamily protein;computational_description
Ro04_G00431	867490	AT1G59950.1	NAD(P)-linked oxidoreductase superfamily protein;computational_description
Ro04_G00430	872213	AT2G01950.1	BRI1-like 2;curator_summary
Ro04_G00429	881737	AT1G68130.1	indeterminate(ID)-domain 14;curator_summary
Ro04_G00427	896577	AT1G14685.1	basic pentacysteine 2;curator_summary
Ro04_G00426	899405	AT1G69860.1	Major facilitator superfamily protein;computational_description
Ro04_G36125	911625	AT1G22370.1	UDP-glucosyl transferase 85A5;symbol
Ro04_G36124	923915	AT2G38280.1	AMP deaminase%2C putative / myoadenylate deaminase;curator_summary
Ro04_G00424	930943	AT1G27090.1	glycine-rich protein;computational_description
Ro04_G00423	935959	AT5G39950.1	thioredoxin 2;curator_summary
Ro04_G00422	937260	AT1G59725.1	DNAJ heat shock family protein;computational_description
Ro04_G00421	941738	AT5G10370.1	helicase domain-containing protein / IBR domain-containing protein / zinc finger protein-like protein;computational_description
Ro04_G00420	942717	AT4G01020.1	helicase domain-containing protein / IBR domain-containing protein / zinc finger protein-like protein;computational_description
Ro04_G00419	949289	AT1G59710.1	actin cross-linking protein (DUF569);computational_description
Ro04_G00418	954727	AT1G69910.1	Protein kinase superfamily protein;computational_description
Ro04_G00417	957262	AT1G27150.1	Tetratricopeptide repeat (TPR)-like superfamily protein;computational_description
Ro04_G36126	961951	AT1G10370.1	Glutathione S-transferase family protein;curator_summary
Ro04_G00415	965939	AT1G05670.1	Pentatricopeptide repeat (PPR-like) superfamily protein;computational_description
Ro04_G00412	973441	AT1G10380.1	Putative membrane lipoprotein;computational_description
Ro04_G00411	975370	AT1G74800.1	Galactosyltransferase family protein;computational_description
Ro04_G00410	980669	AT3G11430.1	glycerol-3-phosphate acyltransferase 5;curator_summary
Ro04_G00409	986873	AT1G10410.1	CW14 protein (DUF1336);computational_description
Ro04_G36118	997649	AT1G10417.1	RUN/FYVE domain protein;curator_summary
Ro04_G00406	1015636	AT1G59640.2	transcription factor BIG PETAL P (BPE);curator_summary
Ro04_G00405	1018648	AT1G77180.1	chromatin protein family;curator_summary
Ro04_G00404	1021506	AT1G59820.1	aminophospholipid ATPase 3;curator_summary
Ro04_G00403	1033167	#N/A	#N/A
Ro04_G00402	1038634	AT1G27170.1	transmembrane receptors / ATP binding protein;computational_description
Ro04_G00401	1043634	AT5G13050.1	5-formyltetrahydrofolate cycloligase;curator_summary
Ro04_G00400	1051184	AT1G69970.2	CLAVATA3/ESR-RELATED 26;curator_summary
Ro04_G00399	1055550	AT1G10430.1	protein phosphatase 2A-2;curator_summary
Ro04_G00397	1062124	AT1G27190.1	Leucine-rich repeat protein kinase family protein;computational_description
Ro04_G00396	1065584	#N/A	#N/A
Ro04_G00394	1070537	AT1G74840.1	Homeodomain-like superfamily protein;computational_description
Ro04_G00393	1073703	AT1G59840.1	cofactor assembly of complex C;symbol
Ro04_G00392	1076894	AT1G27200.1	glycosyltransferase family protein (DUF23);computational_description
Ro04_G00390	1082803	AT1G27210.1	ARM repeat superfamily protein;computational_description
Ro04_G00389	1095008	AT1G70060.1	SIN3-like 4;curator_summary
Ro04_G00388	1104118	AT1G70070.1	AT1G70070.1
Ro04_G00387	1109769	AT1G59900.1	pyruvate dehydrogenase complex E1 alpha subunit;curator_summary
Ro04_G00386	1122071	AT1G70090.1	glucosyl transferase family 8;curator_summary
Ro04_G00385	1124599	AT1G10460.1	germin-like protein 7;curator_summary
Ro04_G36120	1124951	#N/A	#N/A
Ro04_G00383	1127614	AT1G59910.1	Actin-binding FH2 (formin homology 2) family protein;computational_description
Ro04_G00382	1135687	AT3G48100.1	response regulator 5;curator_summary
Ro04_G00381	1141083	AT1G70150.1	zinc ion binding protein;computational_description
Ro04_G36119	1145038	AT1G70160.1	zinc finger MYND domain protein;computational_description
Ro04_G00379	1148306	#N/A	#N/A
Ro04_G00378	1153337	AT1G70170.1	matrix metalloproteinase;curator_summary
Ro04_G36121	1158153	AT1G24130.1	Transducin/WD40 repeat-like superfamily protein;computational_description
Ro04_G00377	1164089	AT1G70180.2	Sterile alpha motif (SAM) domain-containing protein;computational_description
Ro04_G00375	1176945	AT1G59980.1	ARG1-like 2;symbol
Ro04_G00374	1182035	AT1G24110.1	Peroxidase superfamily protein;computational_description
Ro04_G00372	1184932	AT5G56660.1	IAA-leucine resistant (ILR)-like 2;curator_summary
Ro04_G00370	1190297	AT1G10510.1	RNI-like superfamily protein;symbol
Ro04_G00368	1223839	AT1G59990.1	DEA(D/H)-box RNA helicase family protein;symbol
Ro04_G00367	1230309	AT1G10520.1	DNA polymerase lambda (POLL);curator_summary
Ro04_G36122	1236866	AT1G24095.1	Putative thiol-disulfide oxidoreductase DCC;computational_description
Ro04_G00365	1238929	AT5G51080.1	RNase H family protein;computational_description
Ro04_G00364	1242015	AT1G70200.1	RNA-binding (RRM/RBD/RNP motifs) family protein;computational_description
Ro04_G00363	1251086	AT1G70210.1	CYCLIN D1%3B1;curator_summary
Ro04_G00362	1260378	AT1G10522.1	Serine/Threonine-kinase;curator_summary
Ro04_G00361	1262565	AT1G60010.1	D-ribose-binding periplasmic protein;computational_description
Ro04_G00360	1268602	AT1G60030.1	nucleobase-ascorbate transporter 7;symbol
Ro04_G00359	1275486	AT1G24050.1	RNA-processing%2C Lsm domain-containing protein;computational_description
Ro04_G00358	1281606	AT1G70230.1	TRICHOME BIREFRINGENCE-LIKE 27;curator_summary
Ro04_G00357	1284265	AT1G24040.1	Acyl-CoA N-acyltransferases (NAT) superfamily protein;computational_description
Ro04_G00356	1286815	AT1G24030.1	Protein kinase superfamily protein;computational_description
Ro04_G00355	1290800	AT1G24020.1	MLP-like protein 423;symbol
Ro04_G00354	1296829	AT1G70260.1	nodulin MtN21 /EamA-like transporter family protein;curator_summary
Ro04_G00353	1319750	AT1G60060.1	Serine/threonine-protein kinase WNK (With No Lysine)-like protein;computational_description
Ro04_G00352	1322800	AT5G26830.1	Threonyl-tRNA synthetase;curator_summary
Ro04_G00351	1333249	#N/A	#N/A
Ro04_G00350	1336100	AT1G23980.1	RING/U-box superfamily protein;computational_description
Ro04_G00349	1339287	AT1G60070.1	Adaptor protein complex AP-1%2C gamma subunit;computational_description
Ro04_G00348	1349690	AT1G23890.1	NHL domain-containing protein;computational_description
Ro04_G00347	1352438	AT1G70280.2	NHL domain-containing protein;computational_description
Ro04_G36134	1359395	#N/A	#N/A
Ro04_G00345	1366688	AT1G70300.1	K+ uptake permease 6;curator_summary
Ro04_G00344	1382464	AT2G24590.1	RNA recognition motif and CCHC-type zinc finger domains containing protein;curator_summary
Ro04_G00342	1386792	#N/A	#N/A
Ro04_G00341	1395860	AT1G69770.1	chromomethylase 3;curator_summary
Ro04_G36130	1402521	AT4G19170.1	nine-cis-epoxycarotenoid dioxygenase 4;curator_summary
Ro04_G00340	1411910	AT1G23820.2	spermidine synthase;curator_summary
Ro04_G00339	1418336	AT1G60500.1	AT1G60500.1
Ro04_G00338	1427082	AT1G23800.1	aldehyde dehydrogenase 2B7;curator_summary
Ro04_G00337	1432269	AT1G10550.1	xyloglucan:xyloglucosyl transferase 33;curator_summary
Ro04_G00336	1435329	AT1G60190.1	ARM repeat superfamily protein;curator_summary
Ro04_G00335	1437669	AT1G30570.1	hercules receptor kinase 2;curator_summary
Ro04_G00334	1441916	AT1G70330.1	equilibrative nucleotide transporter 1;curator_summary
Ro04_G00333	1444278	AT1G60200.1	splicing factor PWI domain-containing protein / RNA recognition motif (RRM)-containing protein;computational_description
Ro04_G00332	1450967	AT1G60220.1	UB-like protease 1D;curator_summary
Ro04_G00331	1457077	AT5G40270.1	HD domain-containing metal-dependent phosphohydrolase family protein;computational_description
Ro04_G36129	1463975	AT1G60230.1	Radical SAM superfamily protein;computational_description
Ro04_G00329	1468275	AT1G10580.1	Transducin/WD40 repeat-like superfamily protein;computational_description
Ro04_G00328	1471624	AT1G23740.1	Oxidoreductase%2C zinc-binding dehydrogenase family protein;curator_summary
Ro04_G00327	1476141	AT1G23750.1	Nucleic acid-binding%2C OB-fold-like protein;computational_description
Ro04_G00325	1482057	AT1G23760.1	BURP domain-containing protein;curator_summary
Ro04_G00324	1489875	AT1G70350.1	hypothetical protein;computational_description
Ro04_G00323	1492803	AT1G23790.1	dicer-like protein (DUF936);computational_description
Ro04_G00322	1495976	AT3G01500.1	carbonic anhydrase 1;curator_summary
Ro04_G36132	1501749	AT1G10600.1	associated molecule with the SH3 domain of STAM 2;symbol
Ro04_G00320	1506536	AT1G23710.1	hypothetical protein (DUF1645);computational_description
Ro04_G00319	1512049	AT5G14720.1	Protein kinase superfamily protein;computational_description
Ro04_G00318	1518149	AT1G70440.1	similar to RCD one 3;curator_summary
Ro04_G00316	1525640	AT1G10610.1	basic helix-loop-helix (bHLH) DNA-binding superfamily protein;computational_description
Ro04_G00315	1528918	AT1G23530.1	transmembrane protein;computational_description
Ro04_G00311	1539291	AT1G60420.1	DC1 domain-containing protein;curator_summary
Ro04_G36131	1546730	AT1G70480.1	OBP32pep%2C putative (DUF220);computational_description
Ro04_G00309	1549452	AT4G32180.1	pantothenate kinase 2;curator_summary
Ro04_G00308	1560779	AT1G60460.1	hypothetical protein;computational_description
Ro04_G00307	1566501	AT1G60470.1	galactinol synthase 4;curator_summary
Ro04_G00306	1571182	AT1G60490.1	vacuolar protein sorting 34;curator_summary
Ro04_G00305	1583341	AT1G60550.1	enoyl-CoA hydratase/isomerase D;symbol
Ro04_G00304	1587679	AT1G60590.1	Pectin lyase-like superfamily protein;computational_description
Ro04_G00303	1604663	AT1G14920.1	GRAS family transcription factor family protein;curator_summary
Ro04_G00302	1609079	AT5G03830.1	CDK inhibitor P21 binding protein;computational_description
Ro04_G00301	1614750	AT1G23170.1	transmembrane protein (Protein of unknown function DUF2359%2C transmembrane);computational_description
Ro04_G00300	1619399	AT1G70760.1	inorganic carbon transport protein-like protein;curator_summary
Ro04_G00299	1621538	AT1G23180.1	ARM repeat superfamily protein;computational_description
Ro04_G36143	1626462	#N/A	#N/A
Ro04_G36144	1628678	AT1G14910.1	ENTH/ANTH/VHS superfamily protein;computational_description
Ro04_G00296	1637548	AT1G70750.1	myosin-binding protein (Protein of unknown function%2C DUF593);Alias
Ro04_G00295	1643383	AT1G70740.1	Protein kinase superfamily protein;computational_description
Ro04_G00293	1649752	AT1G14900.1	high mobility group A;curator_summary
Ro04_G00292	1652554	AT1G23190.1	Phosphoglucomutase/phosphomannomutase family protein;curator_summary
Ro04_G00291	1660395	AT3G60730.1	Plant invertase/pectin methylesterase inhibitor superfamily;computational_description
Ro04_G00290	1674108	AT1G70710.1	glycosyl hydrolase 9B1;curator_summary
Ro04_G00289	1680508	#N/A	#N/A
Ro04_G00288	1682639	AT1G23220.1	Dynein light chain type 1 family protein;computational_description
Ro04_G36145	1684288	AT2G01620.1	RNI-like superfamily protein;symbol
Ro04_G36146	1685261	AT2G01630.1	O-Glycosyl hydrolases family 17 protein;computational_description
Ro04_G00286	1690813	AT1G23230.1	mediator of RNA polymerase II transcription subunit;computational_description
Ro04_G00285	1703523	AT3G17860.1	jasmonate-zim-domain protein 3;curator_summary
Ro04_G36127	1719413	AT2G01650.1	plant UBX domain-containing protein 2;curator_summary
Ro04_G00283	1724093	AT5G17190.1	B-cell receptor-associated-like protein;computational_description
Ro04_G00281	1729164	AT5G37660.1	plasmodesmata-located protein 7;curator_summary
Ro04_G00280	1734548	AT1G70670.1	Caleosin-related family protein;curator_summary
Ro04_G00279	1742738	AT1G70660.1	MMS ZWEI homologue 2;curator_summary
Ro04_G00278	1745980	AT3G60670.1	PLATZ transcription factor family protein;computational_description
Ro04_G00277	1749494	AT2G30840.1	2-oxoglutarate (2OG) and Fe(II)-dependent oxygenase superfamily protein;curator_summary
Ro04_G00276	1750950	AT1G70650.1	Ran BP2/NZF zinc finger-like superfamily protein;computational_description
Ro04_G36128	1766636	AT1G14860.1	nudix hydrolase homolog 18;symbol
Ro04_G00272	1772524	#N/A	#N/A
Ro04_G00271	1782737	#N/A	#N/A
Ro04_G00270	1784210	AT1G24610.1	Rubisco methyltransferase family protein;computational_description
Ro04_G00269	1787757	AT1G24620.1	EF hand calcium-binding protein family;curator_summary
Ro04_G00267	1793479	AT2G01680.1	Ankyrin repeat family protein;computational_description
Ro04_G00266	1796447	AT3G55620.1	Translation initiation factor IF6;symbol
Ro04_G00265	1800314	AT2G01690.1	ARM repeat superfamily protein;computational_description
Ro04_G00264	1809356	AT1G14850.1	nucleoporin 155;curator_summary
Ro04_G00263	1824923	AT1G24793.1	UDP-3-O-acyl N-acetylglycosamine deacetylase family protein;symbol
Ro04_G00261	1831342	AT1G68070.1	Zinc finger%2C C3HC4 type (RING finger) family protein;computational_description
Ro04_G00260	1836331	AT2G01730.1	cleavage and polyadenylation specificity factor 73 kDa subunit-II;curator_summary
Ro04_G00259	1842303	AT1G68060.1	microtubule-associated proteins 70-1;curator_summary
Ro04_G00258	1853596	AT2G01740.1	AT2G01740.1
Ro04_G00257	1868387	#N/A	#N/A
Ro04_G00256	1896434	AT1G14840.1	microtubule-associated proteins 70-4;curator_summary
Ro04_G00255	1900915	AT1G14830.1	DYNAMIN-like 1C;curator_summary
Ro04_G00254	1907003	AT1G68050.1	flavin-binding%2C kelch repeat%2C f box 1;curator_summary
Ro04_G00253	1910143	AT2G01755.1	hypothetical protein;computational_description
Ro04_G00252	1913514	AT2G01760.1	response regulator 14;curator_summary
Ro04_G36147	1919899	AT1G14820.1	Sec14p-like phosphatidylinositol transfer family protein;computational_description
Ro04_G00250	1924855	AT1G14810.1	semialdehyde dehydrogenase family protein;curator_summary
Ro04_G36148	1930486	AT1G14790.1	RNA-dependent RNA polymerase 1;curator_summary
Ro04_G00249	1934746	AT1G22660.1	Polynucleotide adenylyltransferase family protein;computational_description
Ro04_G00246	1949553	AT1G28380.1	MAC/Perforin domain-containing protein;curator_summary
Ro04_G00245	1957093	AT1G68020.1	UDP-Glycosyltransferase / trehalose-phosphatase family protein;curator_summary
Ro04_G00243	1969950	AT4G17750.1	heat shock factor 1;curator_summary
Ro04_G00242	1974376	AT2G01770.1	vacuolar iron transporter 1;curator_summary
Ro04_G00241	1981904	AT1G65650.1	Peptidase C12%2C ubiquitin carboxyl-terminal hydrolase 1;symbol
Ro04_G36138	1991995	AT4G08850.2	Leucine-rich repeat receptor-like protein kinase family protein;computational_description
Ro04_G00240	1993789	AT1G80910.1	vacuolar fusion CCZ1-like protein (DUF1712);Alias
Ro04_G00239	2000401	AT1G14750.1	Cyclin family protein;curator_summary
Ro04_G00238	2004343	AT1G67960.1	POLLEN DEFECTIVE IN GUIDANCE-like protein;curator_summary
Ro04_G00237	2018018	AT2G19130.1	S-locus lectin protein kinase family protein;computational_description
Ro04_G00235	2024102	AT1G24706.1	THO2;curator_summary
Ro04_G00234	2043496	AT5G37490.1	ARM repeat superfamily protein;computational_description
Ro04_G36136	2053994	#N/A	#N/A
Ro04_G00233	2056446	AT1G66150.1	transmembrane kinase 1;curator_summary
Ro04_G00231	2065517	AT1G14740.1	class I heat shock protein%2C putative (DUF1423);curator_summary
Ro04_G00229	2069718	AT2G01830.1	CHASE domain containing histidine kinase protein;curator_summary
Ro04_G00228	2082918	AT1G24625.1	zinc finger protein 7;curator_summary
Ro04_G00227	2089804	AT1G14740.1	class I heat shock protein%2C putative (DUF1423);curator_summary
Ro04_G00225	2095561	AT1G14730.1	Cytochrome b561/ferric reductase transmembrane protein family;computational_description
Ro04_G00224	2111742	AT2G01850.1	endoxyloglucan transferase A3;curator_summary
Ro04_G00223	2118123	AT1G24909.1	Glutamine amidotransferase type 1 family protein;computational_description
Ro04_G00222	2122237	AT1G14710.1	hydroxyproline-rich glycoprotein family protein;computational_description
Ro04_G36159	2127439	AT1G68080.1	2-oxoglutarate (2OG) and Fe(II)-dependent oxygenase superfamily protein;computational_description
Ro04_G00220	2130948	AT3G17790.1	purple acid phosphatase 17;curator_summary
Ro04_G00219	2147460	AT5G06700.1	trichome birefringence-like protein (DUF828);curator_summary
Ro04_G36161	2155256	AT1G60800.1	NSP-interacting kinase 3;symbol
Ro04_G00217	2164658	AT1G23390.1	Kelch repeat-containing F-box family protein;computational_description
Ro04_G36163	2170318	AT1G10670.1	ATP-citrate lyase A-1;curator_summary
Ro04_G36160	2177242	AT1G10650.1	SBP (S-ribonuclease binding protein) family protein;computational_description
Ro04_G00214	2180831	#N/A	#N/A
Ro04_G00213	2183727	AT1G61700.1	RNA polymerases N / 8 kDa subunit;curator_summary
Ro04_G00212	2186280	AT3G61700.1	helicase with zinc finger protein;computational_description
Ro04_G00210	2203081	AT2G47110.1	ubiquitin 6;curator_summary
Ro04_G00209	2205549	AT1G23400.1	RNA-binding CRS1 / YhbY (CRM) domain-containing protein;curator_summary
Ro04_G36139	2209970	AT5G62960.1	UDP-N-acetylglucosamine-N-acetylmuramyl-pyrophosphoryl-undecaprenol N-acetylglucosamine protein;computational_description
Ro04_G00207	2212692	AT3G10860.1	Cytochrome b-c1 complex%2C subunit 8 protein;computational_description
Ro04_G00206	2214596	AT1G23440.1	Peptidase C15%2C pyroglutamyl peptidase I-like protein;computational_description
Ro04_G00204	2216888	AT1G23460.1	Pectin lyase-like superfamily protein;computational_description
Ro04_G00205	2223358	AT1G70780.1	hypothetical protein;computational_description
Ro04_G00202	2230268	AT2G01540.1	Calcium-dependent lipid-binding (CaLB domain) family protein;Alias
Ro04_G00200	2235231	#N/A	#N/A
Ro04_G00192	2277671	#N/A	#N/A
Ro04_G00193	2280938	AT2G01510.1	Tetratricopeptide repeat (TPR)-like superfamily protein;computational_description
Ro04_G00191	2290535	#N/A	#N/A
Ro04_G00189	2295073	AT1G70900.1	hypothetical protein;computational_description
Ro04_G00187	2312657	AT3G18010.1	WUSCHEL related homeobox 1;curator_summary
Ro04_G00186	2325958	AT2G01490.1	phytanoyl-CoA dioxygenase (PhyH) family protein;curator_summary
Ro04_G00185	2330983	AT2G01480.1	O-fucosyltransferase family protein;computational_description
Ro04_G00184	2339510	AT1G23100.1	GroES-like family protein;computational_description
Ro04_G00183	2345487	AT1G23090.1	sulfate transporter 91;curator_summary
Ro04_G00182	2348621	AT5G50550.1	Transducin/WD40 repeat-like superfamily protein;computational_description
Ro04_G00181	2354030	AT2G01460.1	P-loop containing nucleoside triphosphate hydrolases superfamily protein;computational_description
Ro04_G36135	2371721	#N/A	#N/A
Ro04_G00179	2385877	AT1G30110.1	nudix hydrolase homolog 25;curator_summary
Ro04_G00178	2389109	#N/A	#N/A
Ro04_G36152	2390801	AT3G18040.1	MAP kinase 9;curator_summary
Ro04_G00177	2390843	#N/A	#N/A
Ro04_G00175	2395969	AT1G14990.1	transmembrane protein;computational_description
Ro04_G00173	2400447	AT1G15000.1	serine carboxypeptidase-like 50;symbol
Ro04_G36151	2402993	AT2G01440.1	DEAD/DEAH box RNA helicase family protein;Alias
Ro04_G00171	2418123	AT2G01430.1	homeobox-leucine zipper protein 17;symbol
Ro04_G00169	2429724	AT1G70940.1	Auxin efflux carrier family protein;curator_summary
Ro04_G36153	2442132	AT1G70950.1	TPX2 (targeting protein for Xklp2) protein family;computational_description
Ro04_G00166	2445725	AT1G70985.1	hydroxyproline-rich glycoprotein family protein;computational_description
Ro04_G00165	2451602	AT1G02405.1	proline-rich family protein;computational_description
Ro04_G36154	2454020	AT1G56300.1	Chaperone DnaJ-domain superfamily protein;computational_description
Ro04_G00163	2455266	AT2G01410.1	NHL domain-containing protein;computational_description
Ro04_G00162	2456541	#N/A	#N/A
Ro04_G00160	2477495	AT2G01350.1	quinolinate phoshoribosyltransferase;curator_summary
Ro04_G00159	2488498	AT1G71010.1	FORMS APLOID AND BINUCLEATE CELLS 1C;curator_summary
Ro04_G00158	2499208	AT1G71015.1	plastid movement impaired protein;computational_description
Ro04_G00157	2504048	AT1G23030.1	ARM repeat superfamily protein;computational_description
Ro04_G00156	2512924	AT4G38620.1	myb domain protein 4;curator_summary
Ro04_G00155	2520864	#N/A	#N/A
Ro04_G00154	2525326	AT1G23010.1	Cupredoxin superfamily protein;curator_summary
Ro04_G00153	2535087	AT1G23000.1	Heavy metal transport/detoxification superfamily protein;computational_description
Ro04_G00152	2542834	AT1G71050.1	Heavy metal transport/detoxification superfamily protein;symbol
Ro04_G36156	2552714	AT1G71060.1	Tetratricopeptide repeat (TPR)-like superfamily protein;computational_description
Ro04_G00149	2554876	AT1G71070.1	Core-2/I-branching beta-1%2C6-N-acetylglucosaminyltransferase family protein;computational_description
Ro04_G00148	2559214	AT1G71080.1	RNA polymerase II transcription elongation factor;computational_description
Ro04_G00147	2563223	AT2G01320.1	ABC-2 type transporter family protein;symbol
Ro04_G00146	2568610	#N/A	#N/A
Ro04_G00145	2571482	AT2G01300.1	mediator of RNA polymerase II transcription subunit;computational_description
Ro04_G00144	2579622	AT1G71090.1	Auxin efflux carrier family protein;Alias
Ro04_G00143	2583954	AT1G71100.1	Ribose 5-phosphate isomerase%2C type A protein;curator_summary
Ro04_G00141	2592145	AT1G71110.1	transmembrane protein;computational_description
Ro04_G00139	2601037	AT2G01275.1	RING/FYVE/PHD zinc finger superfamily protein;computational_description
Ro04_G00138	2603786	AT2G01270.1	quiescin-sulfhydryl oxidase 2;curator_summary
Ro04_G00137	2610163	AT1G47790.1	F-box and associated interaction domains-containing protein;computational_description
Ro04_G36168	2621166	AT2G01270.1	quiescin-sulfhydryl oxidase 2;curator_summary
Ro04_G00134	2635109	AT3G06240.1	F-box family protein;computational_description
Ro04_G00132	2643675	AT1G27070.1	5'-AMP-activated protein kinase-like protein;computational_description
Ro04_G00131	2647419	AT1G27060.1	Regulator of chromosome condensation (RCC1) family protein;computational_description
Ro04_G00130	2650510	AT1G27050.1	homeobox leucine zipper protein;curator_summary
Ro04_G00129	2652543	AT2G02590.1	small multi-drug export protein;computational_description
Ro04_G00128	2658081	AT5G15150.1	homeobox 3;curator_summary
Ro04_G00127	2662757	AT5G40405.1	Tetratricopeptide repeat (TPR)-like superfamily protein;computational_description
Ro04_G00126	2674172	AT1G69850.1	nitrate transporter 1:2;curator_summary
Ro04_G00125	2678294	AT1G14430.1	glyoxal oxidase-related protein;computational_description
Ro04_G00123	2686372	AT2G02710.1	PAS/LOV protein B;curator_summary
Ro04_G00122	2693514	AT3G17900.1	heat-inducible transcription repressor;computational_description
Ro04_G00121	2700732	AT5G15080.1	Protein kinase superfamily protein;computational_description
Ro04_G00120	2705518	AT1G07040.1	plant/protein;computational_description
Ro04_G00119	2711314	AT1G69840.1	SPFH/Band 7/PHB domain-containing membrane-associated protein family;computational_description
Ro04_G00118	2715674	AT3G01280.1	voltage dependent anion channel 1;curator_summary
Ro04_G00117	2719023	AT1G69830.1	alpha-amylase-like 3;curator_summary
Ro04_G00114	2736104	AT1G27000.1	GRIP/coiled-coil protein%2C putative (DUF1664);computational_description
Ro04_G00113	2740957	AT5G20220.1	zinc knuckle (CCHC-type) family protein;computational_description
Ro04_G00112	2744688	AT1G14410.1	ssDNA-binding transcriptional regulator;curator_summary
Ro04_G00111	2758434	AT5G15130.1	WRKY DNA-binding protein 72;curator_summary
Ro04_G00109	2763025	AT1G69800.1	Cystathionine beta-synthase (CBS) protein;computational_description
Ro04_G00110	2768355	AT2G02750.1	Pentatricopeptide repeat (PPR) superfamily protein;computational_description
Ro04_G36179	2774105	AT2G02760.1	ubiquiting-conjugating enzyme 2;curator_summary
Ro04_G00108	2777678	AT1G14390.1	Leucine-rich repeat protein kinase family protein;computational_description
Ro04_G00106	2781943	#N/A	#N/A
Ro04_G36180	2782582	AT1G18840.1	IQ-domain 30;symbol
Ro04_G00104	2806357	#N/A	#N/A
Ro04_G00102	2809788	AT4G34030.1	3-methylcrotonyl-CoA carboxylase;curator_summary
Ro04_G00099	2817342	AT2G02800.1	protein kinase 2B;curator_summary
Ro04_G00098	2828565	AT1G14360.1	UDP-galactose transporter 3;symbol
Ro04_G00097	2833148	AT2G02820.1	myb domain protein 88;curator_summary
Ro04_G00096	2849220	AT1G14345.1	NAD(P)-linked oxidoreductase superfamily protein;computational_description
Ro04_G00095	2852488	AT1G69780.1	Homeobox-leucine zipper protein family;curator_summary
Ro04_G00094	2858687	AT2G02860.1	sucrose transporter 2;curator_summary
Ro04_G00093	2864744	AT1G14340.1	RNA-binding (RRM/RBD/RNP motifs) family protein;computational_description
Ro04_G00092	2868903	AT1G26945.1	basic helix-loop-helix (bHLH) DNA-binding superfamily protein;curator_summary
Ro04_G00091	2875726	AT1G26940.1	Cyclophilin-like peptidyl-prolyl cis-trans isomerase family protein;computational_description
Ro04_G36165	2889083	AT1G74510.1	Galactose oxidase/kelch repeat superfamily protein;computational_description
Ro04_G00089	2902686	AT1G69760.1	suppressor SRP40-like protein;computational_description
Ro04_G00088	2909590	AT2G02880.1	mucin-like protein;computational_description
Ro04_G00087	2914212	AT1G26900.1	Pentatricopeptide repeat (PPR) superfamily protein;computational_description
Ro04_G00086	2916520	AT5G19420.1	Regulator of chromosome condensation (RCC1) family with FYVE zinc finger domain-containing protein;computational_description
Ro04_G36166	2924558	AT1G69700.1	HVA22 homologue C;curator_summary
Ro04_G00084	2930449	AT3G47620.1	TEOSINTE BRANCHED%2C cycloidea and PCF (TCP) 14;curator_summary
Ro04_G00083	2939237	AT1G69680.1	ran guanine nucleotide release factor%2C putative (Mog1/PsbP/DUF1795-like photosystem II reaction center PsbP family protein);computational_description
Ro04_G36164	2942216	AT1G26830.1	cullin 3;curator_summary
Ro04_G36167	2944206	AT1G14310.1	Haloacid dehalogenase-like hydrolase (HAD) superfamily protein;computational_description
Ro04_G00080	2950967	AT1G14300.1	ARM repeat superfamily protein;computational_description
Ro04_G00079	2955363	AT1G26840.1	origin recognition complex protein 6;curator_summary
Ro04_G00078	2968977	AT1G14280.1	phytochrome kinase substrate 2;curator_summary
Ro04_G00077	2972217	AT1G26850.1	S-adenosyl-L-methionine-dependent methyltransferases superfamily protein;computational_description
Ro04_G00076	2980019	AT1G14270.1	CAAX amino terminal protease family protein;computational_description
Ro04_G00073	2990263	AT1G26880.1	Ribosomal protein L34e superfamily protein;computational_description
Ro04_G00072	2994706	AT5G39785.1	hypothetical protein (DUF1666);computational_description
Ro04_G00070	3002231	AT3G28920.1	homeobox protein 34;symbol
Ro04_G00069	3007191	#N/A	#N/A
Ro04_G00067	3011171	AT3G47550.1	RING/FYVE/PHD zinc finger superfamily protein;computational_description
Ro04_G00066	3015611	AT2G02970.1	GDA1/CD39 nucleoside phosphatase family protein;curator_summary
Ro04_G36170	3022089	AT3G28960.1	Transmembrane amino acid transporter family protein;computational_description
Ro04_G00064	3024934	AT2G02980.1	Pentatricopeptide repeat (PPR) superfamily protein;curator_summary
Ro04_G36171	3027129	AT2G02990.1	ribonuclease 1;curator_summary
Ro04_G00062	3029542	AT2G02990.1	ribonuclease 1;curator_summary
Ro04_G00061	3033149	AT1G14220.1	Ribonuclease T2 family protein;computational_description
Ro04_G36169	3040292	AT1G26810.1	galactosyltransferase1;curator_summary
Ro04_G36172	3044251	AT1G14205.1	Ribosomal L18p/L5e family protein;computational_description
Ro04_G00059	3046252	AT3G13430.1	RING/U-box superfamily protein;computational_description
Ro04_G00058	3047215	AT1G14185.1	Glucose-methanol-choline (GMC) oxidoreductase family protein;computational_description
Ro04_G00057	3049528	AT1G69580.1	Homeodomain-like superfamily protein;computational_description
Ro04_G00056	3061484	AT5G62430.1	cycling DOF factor 1;curator_summary
Ro04_G00055	3067125	AT5G39670.1	Calcium-binding EF-hand family protein;computational_description
Ro04_G00054	3071814	AT1G26780.1	myb domain protein 117;curator_summary
Ro04_G00052	3083505	AT2G03060.2	AGAMOUS-like 30;curator_summary
Ro04_G00051	3092123	AT1G69530.1	expansin A1;curator_summary
Ro04_G00050	3103820	AT1G14180.2	RING/U-box superfamily protein;computational_description
Ro04_G36175	3109298	AT1G69523.1	S-adenosyl-L-methionine-dependent methyltransferases superfamily protein;computational_description
Ro04_G00048	3112053	AT5G64130.1	cAMP-regulated phosphoprotein 19-related protein;computational_description
Ro04_G36176	3118160	AT1G69500.1	cytochrome P450%2C family 704%2C subfamily B%2C polypeptide 1;curator_summary
Ro04_G36173	3118239	AT1G18720.1	ER membrane protein%2C putative (DUF962);computational_description
Ro04_G36174	3122349	AT1G69490.1	NAC-like%2C activated by AP3/PI;curator_summary
Ro04_G00042	3127691	AT2G03150.1	ATP/GTP-binding protein family;curator_summary
Ro04_G00041	3139736	AT1G26760.1	SET domain protein 35;symbol
Ro04_G00040	3142204	AT2G04660.1	anaphase-promoting complex/cyclosome 2;curator_summary
Ro04_G00039	3148871	AT1G14140.1	Mitochondrial substrate carrier family protein;symbol
Ro04_G00037	3157448	AT5G15310.1	myb domain protein 16;curator_summary
Ro04_G00035	3169087	AT1G26761.1	Arabinanase/levansucrase/invertase;computational_description
Ro04_G00034	3180200	AT1G26550.1	FKBP-like peptidyl-prolyl cis-trans isomerase family protein;computational_description
Ro04_G00033	3195635	AT5G63350.1	von willebrand factor A domain protein;computational_description
Ro04_G00032	3202912	AT2G03220.1	fucosyltransferase 1;curator_summary
Ro04_G36235	3208980	AT1G27190.1	Leucine-rich repeat protein kinase family protein;computational_description
Ro04_G36241	3217105	AT4G25350.1	EXS (ERD1/XPR1/SYG1) family protein;curator_summary
Ro04_G36240	3232554	AT1G26730.1	EXS (ERD1/XPR1/SYG1) family protein;computational_description
Ro04_G00028	3256675	AT1G26730.1	EXS (ERD1/XPR1/SYG1) family protein;computational_description
Ro04_G00027	3266307	AT1G14030.1	Rubisco methyltransferase family protein;curator_summary
Ro04_G36239	3269413	AT1G14020.1	O-fucosyltransferase family protein;computational_description
Ro04_G00025	3276146	AT1G26690.1	emp24/gp25L/p24 family/GOLD family protein;computational_description
Ro04_G00024	3278432	AT1G14000.1	VH1-interacting kinase;curator_summary
Ro04_G00023	3283739	AT1G13990.1	plant/protein;computational_description
Ro04_G00020	3287337	AT1G26670.1	Vesicle transport v-SNARE family protein;curator_summary
Ro04_G00019	3289569	AT1G29150.1	non-ATPase subunit 9;curator_summary
Ro04_G00018	3292952	AT3G01100.1	hypothetical protein 1;curator_summary
Ro04_G00017	3300740	AT1G69440.1	Argonaute family protein;curator_summary
Ro04_G00015	3308855	AT1G26660.1	Prefoldin chaperone subunit family protein;computational_description
Ro04_G00014	3311931	AT3G11810.1	transmembrane protein;computational_description
Ro04_G00013	3314191	AT1G69420.1	DHHC-type zinc finger family protein;computational_description
Ro04_G00012	3325746	AT1G13970.1	beta-hexosaminidase (DUF1336);computational_description
Ro04_G00011	3328520	AT2G03340.1	WRKY DNA-binding protein 3;curator_summary
Ro04_G00010	3333177	AT1G26640.1	Amino acid kinase family protein;computational_description
Ro04_G36177	3344073	AT1G13950.1	eukaryotic elongation factor 5A-1;curator_summary
Ro04_G00007	3347580	AT1G69400.1	Transducin/WD40 repeat-like superfamily protein;computational_description
Ro04_G00006	3351419	AT1G69390.1	homologue of bacterial MinE 1;curator_summary
Ro04_G00005	3353568	AT1G69380.1	sporulation protein (DUF155);curator_summary
Ro04_G00004	3356899	AT2G03350.1	DUF538 family protein (Protein of unknown function%2C DUF538);computational_description
Ro04_G00003	3362905	AT1G69370.1	#N/A
Ro04_G00001	3364217	AT2G03370.1	O-linked-mannose beta-1%2C4-N-acetylglucosaminyltransferase-like protein;computational_description
Ro04_G15145	3390038	AT1G69360.1	T-box transcription factor%2C putative (DUF863);computational_description
Ro04_G15147	3400053	AT2G03380.1	Pentatricopeptide repeat (PPR) superfamily protein;computational_description
Ro04_G36182	3404804	AT1G69340.1	appr-1-p processing enzyme family protein;computational_description
Ro04_G15150	3412439	AT5G03490.1	UDP-Glycosyltransferase superfamily protein;computational_description
Ro04_G15151	3415410	AT2G03430.1	Ankyrin repeat family protein;computational_description
Ro04_G15153	3428182	AT1G13920.1	Remorin family protein;computational_description
Ro04_G15156	3432366	AT3G16610.1	pentatricopeptide (PPR) repeat-containing protein;computational_description
Ro04_G15157	3435559	AT5G61240.1	Leucine-rich repeat (LRR) family protein;computational_description
Ro04_G15159	3441026	AT1G13900.1	Purple acid phosphatases superfamily protein;curator_summary
Ro04_G15160	3443616	AT1G13890.1	soluble N-ethylmaleimide-sensitive factor adaptor protein 30;curator_summary
Ro04_G15163	3448796	AT3G29320.1	Glycosyl transferase%2C family 35;curator_summary
Ro04_G15164	3463856	AT1G69310.1	WRKY DNA-binding protein 57;curator_summary
Ro04_G15165	3478969	AT1G26610.1	C2H2-like zinc finger protein;computational_description
Ro04_G15166	3484340	AT1G26580.1	ELM2 domain protein;computational_description
Ro04_G15167	3488284	AT3G29360.1	UDP-glucose 6-dehydrogenase family protein;curator_summary
Ro04_G15168	3493501	AT1G26560.1	beta glucosidase 40;symbol
Ro04_G15169	3499467	AT1G26520.1	Cobalamin biosynthesis CobW-like protein;computational_description
Ro04_G15171	3505505	AT1G13870.1	KTI12-like%2C chromatin associated protein;curator_summary
Ro04_G15172	3507620	AT2G03480.1	QUASIMODO2 LIKE 2;curator_summary
Ro04_G15173	3513888	AT1G26500.1	Pentatricopeptide repeat (PPR) superfamily protein;computational_description
Ro04_G15175	3519179	AT1G26470.1	chromatin modification-like protein;Alias
Ro04_G15176	3523026	AT5G46110.1	Glucose-6-phosphate/phosphate translocator-like protein;curator_summary
Ro04_G36187	3526598	AT1G26460.1	Tetratricopeptide repeat (TPR)-like superfamily protein;computational_description
Ro04_G15178	3532166	AT1G18650.1	plasmodesmata callose-binding protein 3;curator_summary
Ro04_G15179	3535904	AT1G13820.1	alpha/beta-Hydrolases superfamily protein;computational_description
Ro04_G15180	3540814	AT2G03510.1	SPFH/Band 7/PHB domain-containing membrane-associated protein family;computational_description
Ro04_G15181	3552583	AT1G13770.1	root UVB sensitive protein (Protein of unknown function%2C DUF647);symbol
Ro04_G15182	3556949	AT1G69290.1	Pentatricopeptide repeat (PPR) superfamily protein;computational_description
Ro04_G36183	3559790	#N/A	#N/A
Ro04_G36185	3563957	AT1G13750.1	Purple acid phosphatases superfamily protein;curator_summary
Ro04_G36186	3568297	AT1G13750.1	Purple acid phosphatases superfamily protein;curator_summary
Ro04_G15185	3572181	AT2G03620.1	magnesium transporter 3;curator_summary
Ro04_G15186	3576250	AT2G03630.1	AT2G03630.2
Ro04_G15188	3581832	AT4G15010.1	Mitochondrial substrate carrier family protein;computational_description
Ro04_G36184	3584851	AT2G32230.1	proteinaceous RNase P 1;curator_summary
Ro04_G15190	3588972	AT1G69270.1	receptor-like protein kinase 1;curator_summary
Ro04_G15193	3600706	AT1G13740.1	ABI five binding protein 2;curator_summary
Ro04_G15194	3603066	#N/A	#N/A
Ro04_G15195	3605353	AT2G03640.1	Nuclear transport factor 2 (NTF2) family protein with RNA binding (RRM-RBD-RNP motifs) domain-containing protein;computational_description
Ro04_G15196	3608870	AT2G03667.1	Asparagine synthase family protein;computational_description
Ro04_G36204	3614959	AT2G02040.1	peptide transporter 2;curator_summary
Ro04_G15199	3626129	AT2G03670.1	cell division cycle 48B;curator_summary
Ro04_G15200	3631807	AT1G26370.1	RNA helicase family protein;Alias
Ro04_G15201	3642194	AT1G26355.1	SPIRAL1-like1;curator_summary
Ro04_G15202	3644423	AT2G03690.1	coenzyme Q biosynthesis Coq4 family protein / ubiquinone biosynthesis Coq4 family protein;curator_summary
Ro04_G15203	3647420	AT1G74110.1	cytochrome P450%2C family 78%2C subfamily A%2C polypeptide 10;curator_summary
Ro04_G15205	3656082	AT1G69220.1	Protein kinase superfamily protein;curator_summary
Ro04_G15207	3670061	AT1G69210.1	Uncharacterized protein family UPF0090;computational_description
Ro04_G15208	3678832	AT1G13700.1	6-phosphogluconolactonase 1;curator_summary
Ro04_G15209	3681949	AT1G69200.1	fructokinase-like protein;curator_summary
Ro04_G15210	3689580	AT1G26340.1	cytochrome B5 isoform A;curator_summary
Ro04_G15212	3691800	AT1G04210.1	Leucine-rich repeat protein kinase family protein;curator_summary
Ro04_G15211	3695753	AT1G26330.1	DNA binding protein;computational_description
Ro04_G02526	3725813	AT1G69170.1	Squamosa promoter-binding protein-like (SBP domain) transcription factor family protein;curator_summary
Ro04_G02527	3735839	AT1G69160.1	suppressor;computational_description
Ro04_G02528	3743388	AT1G24260.1	K-box region and MADS-box transcription factor family protein;curator_summary
Ro04_G02530	3756123	AT1G07770.1	ribosomal protein S15A;curator_summary
Ro04_G02532	3766036	AT5G17390.1	Adenine nucleotide alpha hydrolases-like superfamily protein;computational_description
Ro04_G02533	3768298	AT1G69070.1	nucleolar-like protein;computational_description
Ro04_G02535	3780254	AT3G14630.1	cytochrome P450%2C family 72%2C subfamily A%2C polypeptide 9;curator_summary
Ro04_G36198	3783146	AT1G67110.1	cytochrome P450%2C family 735%2C subfamily A%2C polypeptide 2;curator_summary
Ro04_G02536	3785974	AT3G14680.1	cytochrome P450%2C family 72%2C subfamily A%2C polypeptide 14;curator_summary
Ro04_G02537	3795549	AT3G14660.1	cytochrome P450%2C family 72%2C subfamily A%2C polypeptide 13;curator_summary
Ro04_G36297	3804836	AT3G14660.1	cytochrome P450%2C family 72%2C subfamily A%2C polypeptide 13;curator_summary
Ro04_G36295	3817178	AT2G03870.1	Small nuclear ribonucleoprotein family protein;symbol
Ro04_G02541	3837921	AT1G69060.1	Chaperone DnaJ-domain superfamily protein;computational_description
Ro04_G02543	3846065	AT1G69040.2	ACT domain repeat 4;curator_summary
Ro04_G02545	3862340	AT2G03780.1	Translin family protein;computational_description
Ro04_G02546	3865073	AT2G03800.1	D-aminoacyl-tRNA deacylase;curator_summary
Ro04_G02547	3876652	AT2G03810.1	18S pre-ribosomal assembly protein gar2-like protein;computational_description
Ro04_G02548	3885808	AT1G69030.1	BSD domain-containing protein;computational_description
Ro04_G36188	3888392	AT1G69020.1	Prolyl oligopeptidase family protein;computational_description
Ro04_G02551	3908950	AT1G69010.1	BES1-interacting Myc-like protein 2;curator_summary
Ro04_G02553	3916314	#N/A	#N/A
Ro04_G02555	3924687	AT2G03890.1	phosphoinositide 4-kinase gamma 7;curator_summary
Ro04_G02557	3933592	AT1G13635.1	DNA glycosylase superfamily protein;computational_description
Ro04_G02558	3937510	AT1G13630.1	Tetratricopeptide repeat (TPR)-like superfamily protein;computational_description
Ro04_G36191	3945091	AT1G51210.1	UDP-Glycosyltransferase superfamily protein;computational_description
Ro04_G36189	3959677	AT5G03490.1	UDP-Glycosyltransferase superfamily protein;computational_description
Ro04_G02559	3973720	AT3G30380.1	alpha/beta-Hydrolases superfamily protein;computational_description
Ro04_G02560	3976871	AT2G04030.1	Chaperone protein htpG family protein;curator_summary
Ro04_G02561	3983007	AT5G15700.1	DNA/RNA polymerases superfamily protein;curator_summary
Ro04_G02562	3995466	AT3G30390.1	Transmembrane amino acid transporter family protein;curator_summary
Ro04_G02563	4005101	AT1G68940.1	AT1G68940.3
Ro04_G02565	4012687	AT1G68930.1	pentatricopeptide (PPR) repeat-containing protein;computational_description
Ro04_G02566	4016252	AT1G68920.1	basic helix-loop-helix (bHLH) DNA-binding superfamily protein;Alias
Ro04_G02567	4034159	AT1G68910.1	WPP domain-interacting protein 2;curator_summary
Ro04_G02570	4040213	#N/A	#N/A
Ro04_G02572	4044184	AT1G68890.1	2-oxoglutarate decarboxylase/hydro-lyase/magnesium ion-binding protein;curator_summary
Ro04_G02574	4065200	AT1G13600.1	basic leucine-zipper 58;symbol
Ro04_G02576	4074896	AT1G26230.1	TCP-1/cpn60 chaperonin family protein;curator_summary
Ro04_G02577	4079660	#N/A	#N/A
Ro04_G02578	4080404	AT1G26220.1	Acyl-CoA N-acyltransferases (NAT) superfamily protein;computational_description
Ro04_G02579	4081537	#N/A	#N/A
Ro04_G02580	4083772	AT1G13580.2	LAG1 longevity assurance-like protein;curator_summary
Ro04_G02581	4087668	AT3G25545.1	trigger factor;computational_description
Ro04_G02583	4089694	AT1G68850.1	Peroxidase superfamily protein;computational_description
Ro04_G02586	4108058	AT1G13570.1	F-box/RNI-like superfamily protein;computational_description
Ro04_G02585	4111267	AT3G25560.1	NSP-interacting kinase 2;symbol
Ro04_G02587	4121714	AT5G15950.1	Adenosylmethionine decarboxylase family protein;computational_description
Ro04_G02589	4130686	AT3G57030.1	Calcium-dependent phosphotriesterase superfamily protein;computational_description
Ro04_G02590	4143347	AT1G13560.1	aminoalcoholphosphotransferase 1;curator_summary
Ro04_G02591	4148903	AT1G26180.1	membrane protein;computational_description
Ro04_G02592	4153857	AT3G25590.1	micronuclear linker histone polyprotein-like protein;computational_description
Ro04_G02593	4156180	AT1G26170.1	ARM repeat superfamily protein;computational_description
Ro04_G02595	4181448	#N/A	#N/A
Ro04_G02596	4184966	AT1G26160.1	Metal-dependent phosphohydrolase;computational_description
Ro04_G36200	4190584	AT1G68690.1	Protein kinase superfamily protein;curator_summary
Ro04_G02598	4195134	AT3G25597.1	transmembrane protein;computational_description
Ro04_G02599	4196556	AT3G25600.1	Calcium-binding EF-hand family protein;computational_description
Ro04_G02600	4197744	AT3G25610.1	ATPase E1-E2 type family protein / haloacid dehalogenase-like hydrolase family protein;computational_description
Ro04_G02601	4215209	AT1G68720.1	tRNA arginine adenosine deaminase;curator_summary
Ro04_G36201	4220961	#N/A	#N/A
Ro04_G36202	4227200	AT1G68740.1	EXS (ERD1/XPR1/SYG1) family protein;curator_summary
Ro04_G02604	4247923	AT1G26120.1	alpha/beta-Hydrolases superfamily protein;symbol
Ro04_G02605	4252951	#N/A	#N/A
Ro04_G02606	4254712	#N/A	#N/A
Ro04_G02607	4259356	AT3G25620.1	ABC-2 type transporter family protein;symbol
Ro04_G02608	4277028	AT1G68750.1	phosphoenolpyruvate carboxylase 4;curator_summary
Ro04_G36199	4286644	AT1G68760.1	nudix hydrolase 1;curator_summary
Ro04_G02611	4293939	#N/A	#N/A
Ro04_G02612	4303613	AT5G23100.1	MIZU-KUSSEI-like protein (Protein of unknown function%2C DUF617);computational_description
Ro04_G02613	4312607	#N/A	#N/A
Ro04_G02614	4318224	AT3G25670.1	Leucine-rich repeat (LRR) family protein;computational_description
Ro04_G02615	4322207	AT1G13220.1	nuclear matrix constituent protein-like protein;curator_summary
Ro04_G02616	4331972	AT1G26110.1	decapping 5;curator_summary
Ro04_G02619	4341038	AT1G26100.1	Cytochrome b561/ferric reductase transmembrane protein family;computational_description
Ro04_G02620	4343343	AT3G25680.1	SLH domain protein;computational_description
Ro04_G02621	4349293	AT3G25690.1	Hydroxyproline-rich glycoprotein family protein;curator_summary
Ro04_G02622	4353849	AT1G26090.1	P-loop containing nucleoside triphosphate hydrolases superfamily protein;computational_description
Ro04_G02623	4357633	#N/A	#N/A
Ro04_G02624	4365084	AT1G25682.1	coiled-coil protein (DUF572);computational_description
Ro04_G02625	4369986	AT1G68800.1	TCP domain protein 12;curator_summary
Ro04_G02626	4377651	AT3G25700.1	Eukaryotic aspartyl protease family protein;computational_description
Ro04_G02627	4386751	AT1G68810.1	basic helix-loop-helix (bHLH) DNA-binding superfamily protein;Alias
Ro04_G36194	4392416	AT1G68820.1	Transmembrane Fragile-X-F-associated protein;computational_description
Ro04_G02628	4398213	AT1G75280.1	NmrA-like negative transcriptional regulator family protein;curator_summary
Ro04_G02629	4404610	AT5G08550.1	GC-rich sequence DNA-binding factor-like protein;curator_summary
Ro04_G02630	4410716	AT1G25580.1	NAC (No Apical Meristem) domain transcriptional regulator superfamily protein;curator_summary
Ro04_G02631	4417540	AT1G13245.1	ROTUNDIFOLIA like 17;symbol
Ro04_G36196	4420697	AT1G68830.1	Serine/Threonine kinase domain protein;curator_summary
Ro04_G36195	4425648	AT3G62660.1	galacturonosyltransferase-like 7;curator_summary
Ro04_G02633	4425672	#N/A	#N/A
Ro04_G02634	4430491	AT1G25570.1	Di-glucose binding protein with Leucine-rich repeat domain-containing protein;computational_description
Ro04_G02635	4444967	AT1G68840.1	related to ABI3/VP1 2;curator_summary
Ro04_G02636	4450827	AT1G13270.1	methionine aminopeptidase 1B;curator_summary
Ro04_G36193	4455871	AT1G13280.1	allene oxide cyclase 4;curator_summary
Ro04_G02638	4460734	AT1G13290.1	C2H2-like zinc finger protein;curator_summary
Ro04_G02640	4468660	AT1G25550.1	myb-like transcription factor family protein;computational_description
Ro04_G02641	4475593	AT1G29700.1	Metallo-hydrolase/oxidoreductase superfamily protein;computational_description
Ro04_G02642	4485821	AT1G25540.1	phytochrome and flowering time regulatory protein (PFT1);curator_summary
Ro04_G02644	4502387	AT1G25530.1	Transmembrane amino acid transporter family protein;computational_description
Ro04_G36206	4518477	AT3G26190.1	cytochrome P450%2C family 71%2C subfamily B%2C polypeptide 21;curator_summary
Ro04_G02645	4525359	AT1G68650.1	Uncharacterized protein family (UPF0016);computational_description
Ro04_G02646	4531574	AT1G25510.1	Eukaryotic aspartyl protease family protein;computational_description
Ro04_G36207	4534350	AT1G25500.2	Plasma-membrane choline transporter family protein;computational_description
Ro04_G02648	4540203	AT5G06950.1	bZIP transcription factor family protein;curator_summary
Ro04_G02649	4544052	#N/A	#N/A
Ro04_G02652	4555903	AT1G68620.1	alpha/beta-Hydrolases superfamily protein;computational_description
Ro04_G02653	4557586	#N/A	#N/A
Ro04_G02654	4558494	AT3G25800.1	protein phosphatase 2A subunit A2;curator_summary
Ro04_G02655	4571342	AT1G68600.1	aluminum activated malate transporter family protein;computational_description
Ro04_G02656	4576681	AT5G08420.1	RNA-binding KH domain-containing protein;computational_description
Ro04_G36213	4593797	AT3G25805.1	transmembrane protein;computational_description
Ro04_G02657	4595597	AT1G13330.1	Tat-binding protein 1(Tbp-1)-interacting protein (TBPIP);curator_summary
Ro04_G02659	4597825	AT1G13340.1	Regulator of Vps4 activity in the MVB pathway protein;computational_description
Ro04_G02660	4601017	AT3G25840.1	Protein kinase superfamily protein;computational_description
Ro04_G36212	4610272	#N/A	#N/A
Ro04_G02662	4611352	#N/A	#N/A
Ro04_G02663	4613367	AT1G68580.1	Agenet and bromo-adjacent homology (BAH) domain-containing protein;computational_description
Ro04_G02664	4624437	AT3G25860.1	2-oxoacid dehydrogenases acyltransferase family protein;curator_summary
Ro04_G02665	4627740	AT4G39670.1	Glycolipid transfer protein (GLTP) family protein;computational_description
Ro04_G02666	4630380	AT1G68570.1	Major facilitator superfamily protein;Alias
Ro04_G02668	4640401	AT5G38470.1	Rad23 UV excision repair protein family;curator_summary
Ro04_G02669	4645885	AT1G13360.1	hypothetical protein;computational_description
Ro04_G02670	4657629	#N/A	#N/A
Ro04_G02671	4672204	AT1G68560.1	alpha-xylosidase 1;curator_summary
Ro04_G02672	4681624	#N/A	#N/A
Ro04_G02673	4682093	AT5G64750.1	Integrase-type DNA-binding superfamily protein;curator_summary
Ro04_G36214	4683953	AT1G68540.1	NAD(P)-binding Rossmann-fold superfamily protein;symbol
Ro04_G36220	4694112	AT1G68530.1	3-ketoacyl-CoA synthase 6;curator_summary
Ro04_G36217	4699685	AT3G25900.1	Homocysteine S-methyltransferase family protein;symbol
Ro04_G02678	4708004	AT3G05570.1	dipeptide transport ATP-binding protein;computational_description
Ro04_G02679	4709353	#N/A	#N/A
Ro04_G02680	4713569	AT1G25440.1	B-box type zinc finger protein with CCT domain-containing protein;symbol
Ro04_G02681	4716255	AT3G02550.1	LOB domain-containing protein 41;symbol
Ro04_G02682	4720741	#N/A	#N/A
Ro04_G02683	4724911	AT1G13380.1	sodium/hydrogen exchanger (DUF1218);computational_description
Ro04_G02684	4736262	AT1G67090.1	ribulose bisphosphate carboxylase small chain 1A;curator_summary
Ro04_G02685	4737974	#N/A	#N/A
Ro04_G02686	4742497	AT1G68490.1	translocase subunit seca;computational_description
Ro04_G02687	4754055	AT3G25920.1	ribosomal protein L15;curator_summary
Ro04_G02688	4761029	AT1G68480.1	C2H2 and C2HC zinc fingers superfamily protein;curator_summary
Ro04_G02689	4770057	AT1G25420.1	Regulator of Vps4 activity in the MVB pathway protein;computational_description
Ro04_G36219	4773093	AT1G77420.1	alpha/beta-Hydrolases superfamily protein;computational_description
Ro04_G02691	4776071	AT1G77420.1	alpha/beta-Hydrolases superfamily protein;computational_description
Ro04_G36216	4778240	AT1G13410.1	Tetratricopeptide repeat (TPR)-like superfamily protein;computational_description
Ro04_G02694	4793369	AT3G18360.1	VQ motif-containing protein;computational_description
Ro04_G02695	4797357	#N/A	#N/A
Ro04_G02696	4801537	AT1G68290.1	endonuclease 2;curator_summary
Ro04_G36210	4803525	AT3G11930.1	Adenine nucleotide alpha hydrolases-like superfamily protein;computational_description
Ro04_G02698	4805203	AT1G68300.1	Adenine nucleotide alpha hydrolases-like superfamily protein;computational_description
Ro04_G02699	4807098	AT1G68260.1	Thioesterase superfamily protein;Alias
Ro04_G36209	4812531	AT4G24540.1	AGAMOUS-like 24;curator_summary
Ro04_G02701	4833246	AT1G25330.1	basic helix-loop-helix (bHLH) DNA-binding superfamily protein;curator_summary
Ro04_G02702	4840368	AT1G68320.1	myb domain protein 62;curator_summary
Ro04_G02703	4841416	#N/A	#N/A
Ro04_G02704	4843414	AT1G25350.1	glutamine-tRNA ligase%2C putative / glutaminyl-tRNA synthetase%2C putative / GlnRS;symbol
Ro04_G02706	4853537	AT1G68330.1	membrane-associated kinase regulator;computational_description
Ro04_G02705	4856449	AT1G48770.1	hypothetical protein (DUF1639);computational_description
Ro04_G02708	4862456	#N/A	#N/A
Ro04_G02709	4866624	AT5G38830.1	Cysteinyl-tRNA synthetase%2C class Ia family protein;computational_description
Ro04_G02710	4876889	AT1G68360.1	C2H2 and C2HC zinc fingers superfamily protein;curator_summary
Ro04_G02711	4885752	AT1G68370.1	Chaperone DnaJ-domain superfamily protein;curator_summary
Ro04_G02712	4893266	AT3G18290.1	zinc finger protein-like protein;curator_summary
Ro04_G02713	4912084	AT1G25375.1	Metallo-hydrolase/oxidoreductase superfamily protein;computational_description
Ro04_G02714	4919777	AT1G73810.1	Core-2/I-branching beta-1%2C6-N-acetylglucosaminyltransferase family protein;computational_description
Ro04_G02716	4926372	AT1G68400.1	leucine-rich repeat transmembrane protein kinase family protein;computational_description
Ro04_G02720	4950461	AT1G68410.1	Protein phosphatase 2C family protein;computational_description
Ro04_G02721	4959493	AT1G25380.1	NAD+ transporter 2;curator_summary
Ro04_G02722	4963590	#N/A	#N/A
Ro04_G02724	4965319	AT1G66880.1	AT1G66880.1
Ro04_G02725	4981150	#N/A	#N/A
Ro04_G02726	4985430	AT2G01260.1	hypothetical protein (DUF789);computational_description
Ro04_G36221	4992155	AT1G68220.1	aerobic coproporphyrinogen-III oxidase (DUF1218);computational_description
Ro04_G02733	5021713	#N/A	#N/A
Ro04_G36225	5021886	AT2G01220.1	Nucleotidylyl transferase superfamily protein;computational_description
Ro04_G36222	5028712	AT2G01210.1	Leucine-rich repeat protein kinase family protein;computational_description
Ro04_G36226	5031889	AT1G15050.1	indole-3-acetic acid inducible 34;curator_summary
Ro04_G02736	5034005	AT1G15060.1	alpha/beta hydrolase family protein;computational_description
Ro04_G02737	5038909	AT1G49540.1	elongator protein 2;symbol
Ro04_G02738	5045618	AT2G01190.1	Octicosapeptide/Phox/Bem1p family protein;symbol
Ro04_G02740	5062897	AT3G02600.1	lipid phosphate phosphatase 3;curator_summary
Ro04_G36223	5066880	AT1G15080.1	lipid phosphate phosphatase 2;curator_summary
Ro04_G02742	5070260	#N/A	#N/A
Ro04_G02743	5072589	#N/A	#N/A
Ro04_G02744	5073790	AT2G27710.1	60S acidic ribosomal protein family;computational_description
Ro04_G02745	5076141	#N/A	#N/A
Ro04_G02746	5077416	AT2G01170.1	bidirectional amino acid transporter 1;curator_summary
Ro04_G02747	5084123	#N/A	#N/A
Ro04_G02748	5089548	#N/A	#N/A
Ro04_G36228	5093070	AT1G68190.1	B-box zinc finger family protein;symbol
Ro04_G02750	5104042	AT1G68200.1	Zinc finger C-x8-C-x5-C-x3-H type family protein;Alias
Ro04_G36229	5113182	#N/A	#N/A
Ro04_G02754	5124195	#N/A	#N/A
Ro04_G02755	5129888	AT2G01150.1	RING-H2 finger protein 2B;curator_summary
Ro04_G02756	5132671	AT1G22950.1	2-oxoglutarate (2OG) and Fe(II)-dependent oxygenase superfamily protein;computational_description
Ro04_G02759	5140751	AT2G01140.1	Aldolase superfamily protein;symbol
Ro04_G02760	5145423	AT2G01130.1	DEA(D/H)-box RNA helicase family protein;computational_description
Ro04_G02761	5159929	AT1G15110.1	phosphatidyl serine synthase family protein;curator_summary
Ro04_G36230	5169181	AT5G39710.1	Tetratricopeptide repeat (TPR)-like superfamily protein;symbol
Ro04_G02764	5173274	AT2G01120.1	origin recognition complex subunit 4;curator_summary
Ro04_G02765	5177304	AT2G01110.1	Sec-independent periplasmic protein translocase;curator_summary
Ro04_G02766	5179341	AT1G22970.1	cyclin-D1-binding protein;computational_description
Ro04_G02767	5188881	AT1G15180.1	MATE efflux family protein;computational_description
Ro04_G02768	5207476	AT2G40950.1	Basic-leucine zipper (bZIP) transcription factor family protein;curator_summary
Ro04_G02769	5210226	AT5G52450.1	MATE efflux family protein;computational_description
Ro04_G02770	5212404	AT5G38110.1	anti- silencing function 1b;curator_summary
Ro04_G02771	5217820	AT5G08670.1	ATP synthase alpha/beta family protein;curator_summary
Ro04_G36261	5221658	AT1G15140.1	FAD/NAD(P)-binding oxidoreductase;computational_description
Ro04_G02773	5225018	AT2G01100.1	FAM133-like protein;computational_description
Ro04_G02774	5228513	AT1G15130.1	Endosomal targeting BRO1-like domain-containing protein;computational_description
Ro04_G02775	5235081	AT2G42850.1	cytochrome P450%2C family 718;curator_summary
Ro04_G02776	5241916	#N/A	#N/A
Ro04_G02778	5249219	#N/A	#N/A
Ro04_G02779	5250539	AT5G13240.1	transcription regulator;computational_description
Ro04_G02780	5254927	AT1G25240.1	ENTH/VHS/GAT family protein;computational_description
Ro04_G02781	5258300	#N/A	#N/A
Ro04_G02782	5264871	AT2G01910.1	Microtubule associated protein (MAP65/ASE1) family protein;curator_summary
Ro04_G02783	5274580	AT2G01905.1	cyclin J18;curator_summary
Ro04_G02787	5297861	AT1G23380.1	homeobox protein knotted-1-like 6;curator_summary
Ro04_G02788	5304358	AT1G23360.1	S-adenosyl-L-methionine-dependent methyltransferases superfamily protein;curator_summary
Ro04_G36252	5306339	AT1G70520.1	cysteine-rich RLK (RECEPTOR-like protein kinase) 2;curator_summary
Ro04_G02789	5321156	AT1G70530.1	cysteine-rich RLK (RECEPTOR-like protein kinase) 3;curator_summary
Ro04_G36251	5325821	#N/A	#N/A
Ro04_G02791	5341723	AT5G04600.1	RNA-binding (RRM/RBD/RNP motifs) family protein;computational_description
Ro04_G02793	5346426	AT3G26430.1	GDSL-like Lipase/Acylhydrolase superfamily protein;curator_summary
Ro04_G02794	5358883	#N/A	#N/A
Ro04_G02795	5360117	AT1G67810.1	sulfur E2;curator_summary
Ro04_G02796	5362986	AT3G26370.1	O-fucosyltransferase family protein;computational_description
Ro04_G02797	5371926	AT1G10700.1	phosphoribosyl pyrophosphate (PRPP) synthase 3;curator_summary
Ro04_G02798	5375195	AT1G70570.1	anthranilate phosphoribosyltransferase;computational_description
Ro04_G02799	5381353	AT1G10710.1	poor homologous synapsis 1;curator_summary
Ro04_G02802	5392058	AT1G60780.1	Clathrin adaptor complexes medium subunit family protein;symbol
Ro04_G02803	5396546	AT4G24670.1	tryptophan aminotransferase related 2;curator_summary
Ro04_G02804	5404415	AT1G10740.1	alpha/beta-Hydrolases superfamily protein;computational_description
Ro04_G02805	5411850	AT1G60770.1	Tetratricopeptide repeat (TPR)-like superfamily protein;computational_description
Ro04_G02806	5415492	AT5G50150.1	NEP-interacting protein%2C putative (DUF239);computational_description
Ro04_G02807	5425642	#N/A	#N/A
Ro04_G02808	5426618	AT1G10760.1	Pyruvate phosphate dikinase%2C PEP/pyruvate binding domain-containing protein;curator_summary
Ro04_G02810	5447746	AT1G12940.1	nitrate transporter2.5;curator_summary
Ro04_G02811	5449926	AT3G29400.1	exocyst subunit exo70 family protein E1;curator_summary
Ro04_G02812	5457196	#N/A	#N/A
Ro04_G24688	5490146	AT5G35410.1	Protein kinase superfamily protein;curator_summary
Ro04_G24689	5498899	#N/A	#N/A
Ro04_G24690	5504768	AT2G04220.1	DUF868 family protein (DUF868);computational_description
Ro04_G24691	5507292	AT1G67820.1	Protein phosphatase 2C family protein;computational_description
Ro04_G24692	5515825	AT1G67840.1	chloroplast sensor kinase;curator_summary
Ro04_G24693	5524284	AT1G67850.1	lysine ketoglutarate reductase trans-splicing protein (DUF707);computational_description
Ro04_G24694	5530725	AT1G24580.1	RING/U-box superfamily protein;computational_description
Ro04_G24695	5531903	#N/A	#N/A
Ro04_G24698	5534536	AT3G27540.1	beta-1%2C4-N-acetylglucosaminyltransferase family protein;computational_description
Ro04_G24700	5548889	AT1G67900.1	Phototropic-responsive NPH3 family protein;computational_description
Ro04_G24701	5555604	AT1G67910.1	hypothetical protein;computational_description
Ro04_G24702	5561437	AT1G24590.1	DORNROSCHEN-like protein;curator_summary
Ro04_G24703	5579061	AT1G59950.1	NAD(P)-linked oxidoreductase superfamily protein;computational_description
Ro04_G19456	5606700	AT1G59950.1	NAD(P)-linked oxidoreductase superfamily protein;computational_description
Ro04_G36256	5622058	AT1G59950.1	NAD(P)-linked oxidoreductase superfamily protein;computational_description
Ro04_G19458	5623586	#N/A	#N/A
Ro04_G19459	5629892	AT1G78550.1	2-oxoglutarate (2OG) and Fe(II)-dependent oxygenase superfamily protein;computational_description
Ro04_G19460	5632138	AT1G23280.1	MAK16 protein-like protein;computational_description
Ro04_G36254	5639605	AT3G26510.1	Octicosapeptide/Phox/Bem1p family protein;computational_description
Ro04_G19463	5645643	AT3G26570.1	phosphate transporter 2%3B1;curator_summary
Ro04_G19464	5648775	AT1G70630.1	Nucleotide-diphospho-sugar transferase family protein;Alias
Ro04_G19465	5661181	AT1G70610.1	transporter associated with antigen processing protein 1;curator_summary
Ro04_G19466	5666752	AT3G26580.1	Tetratricopeptide repeat (TPR)-like superfamily protein;computational_description
Ro04_G19467	5669562	AT1G70600.1	Ribosomal protein L18e/L15 superfamily protein;computational_description
Ro04_G36257	5671341	AT1G23300.1	MATE efflux family protein;computational_description
Ro04_G36255	5674576	AT1G12950.1	root hair specific 2;symbol
Ro04_G19468	5691515	AT2G42490.1	Copper amine oxidase family protein;computational_description
Ro04_G19470	5697569	AT3G26600.1	armadillo repeat only 4;curator_summary
Ro04_G19469	5700420	AT1G70590.1	F-box family protein;computational_description
Ro04_G19471	5706484	AT5G40460.1	cyclin-dependent kinase inhibitor SMR3-like protein;computational_description
Ro04_G36246	5710361	AT1G70580.1	alanine-2-oxoglutarate aminotransferase 2;curator_summary
Ro04_G36243	5715458	AT1G13030.1	sphere organelles protein-like protein;curator_summary
Ro04_G19475	5722382	AT3G55270.1	mitogen-activated protein kinase phosphatase 1;curator_summary
Ro04_G19476	5730377	#N/A	#N/A
Ro04_G19477	5733015	AT3G26350.1	AT3G26350.1
Ro04_G19479	5734530	AT3G53570.1	serine/threonine-protein kinase AFC1;curator_summary
Ro04_G36244	5742129	AT2G24180.1	cytochrome p450 71b6;curator_summary
Ro04_G19480	5748817	AT1G24560.1	paramyosin;computational_description
Ro04_G19481	5753134	AT3G01650.1	RING domain ligase1;curator_summary
Ro04_G19482	5756914	AT1G13120.1	nucleoporin GLE1-like protein;symbol
Ro04_G19484	5792196	AT1G67790.1	sieve element occlusion protein;computational_description
Ro04_G19485	5805647	AT3G01670.1	sieve element occlusion protein;curator_summary
Ro04_G19486	5830097	AT1G24530.1	Transducin/WD40 repeat-like superfamily protein;computational_description
Ro04_G22257	5886615	AT3G26120.1	terminal EAR1-like 1;curator_summary
Ro04_G22256	5895312	AT3G26115.1	Pyridoxal-5'-phosphate-dependent enzyme family protein;computational_description
Ro04_G22255	5898109	AT1G13160.1	ARM repeat superfamily protein;computational_description
Ro04_G22254	5903835	AT1G13170.1	OSBP(oxysterol binding protein)-related protein 1D;symbol
Ro04_G22252	5919899	AT1G13180.1	Actin-like ATPase superfamily protein;curator_summary
Ro04_G22251	5925984	AT1G13190.1	RNA-binding (RRM/RBD/RNP motifs) family protein;computational_description
Ro04_G36263	5937538	AT1G24510.1	TCP-1/cpn60 chaperonin family protein;computational_description
Ro04_G22247	5942835	AT1G67750.1	Pectate lyase family protein;computational_description
Ro04_G22246	5950009	AT3G26100.2	Regulator of chromosome condensation (RCC1) family protein;computational_description
Ro04_G22245	5963500	AT1G24490.1	OxaA/YidC-like membrane insertion protein;curator_summary
Ro04_G22244	5967365	AT1G67740.1	photosystem II BY;curator_summary
Ro04_G22242	5970919	#N/A	#N/A
Ro04_G22241	5976278	AT1G67730.1	beta-ketoacyl reductase 1;curator_summary
Ro04_G36287	5985359	AT1G67730.1	beta-ketoacyl reductase 1;curator_summary
Ro04_G36286	5991043	AT1G67730.1	beta-ketoacyl reductase 1;curator_summary
Ro04_G36288	5999214	AT1G67730.1	beta-ketoacyl reductase 1;curator_summary
Ro04_G22240	6007438	AT1G24470.1	beta-ketoacyl reductase 2;curator_summary
Ro04_G22237	6013016	AT3G26090.1	REGULATOR OF G-PROTEIN SIGNALING 1;curator_summary
Ro04_G22236	6017621	AT5G55850.1	RPM1-interacting protein 4 (RIN4) family protein;curator_summary
Ro04_G22234	6022004	#N/A	#N/A
Ro04_G22233	6023244	AT3G26085.1	CAAX amino terminal protease family protein;computational_description
Ro04_G07222	6046471	AT5G35450.1	Disease resistance protein (CC-NBS-LRR class) family;computational_description
Ro04_G07219	6061241	AT1G13195.1	RING/U-box superfamily protein;computational_description
Ro04_G07218	6064027	AT1G67720.1	Leucine-rich repeat protein kinase family protein;computational_description
Ro04_G07217	6071603	AT1G13195.1	RING/U-box superfamily protein;computational_description
Ro04_G07216	6077408	AT1G67710.1	response regulator 11;curator_summary
Ro04_G07215	6081392	AT3G26050.1	TPX2 (targeting protein for Xklp2) protein family;computational_description
Ro04_G07214	6087650	AT4G27670.1	heat shock protein 21;curator_summary
Ro04_G07213	6092320	AT3G26210.1	cytochrome P450%2C family 71%2C subfamily B%2C polypeptide 23;curator_summary
Ro04_G07212	6094573	AT1G67700.1	multidrug resistance protein;Alias
Ro04_G07211	6100225	AT4G17230.1	SCARECROW-like 13;curator_summary
Ro04_G07210	6102872	AT3G27320.1	alpha/beta-Hydrolases superfamily protein;computational_description
Ro04_G07207	6121952	AT1G24430.1	HXXXD-type acyl-transferase family protein;computational_description
Ro04_G07205	6146745	AT1G24430.1	HXXXD-type acyl-transferase family protein;computational_description
Ro04_G07204	6155984	AT1G24430.1	HXXXD-type acyl-transferase family protein;computational_description
Ro04_G36268	6161199	AT2G45580.1	cytochrome P450%2C family 76%2C subfamily C%2C polypeptide 3;curator_summary
Ro04_G07203	6173035	AT3G13090.1	multidrug resistance-associated protein 8;curator_summary
Ro04_G07202	6187106	AT3G25980.1	DNA-binding HORMA family protein;curator_summary
Ro04_G07200	6188994	AT3G25990.1	Homeodomain-like superfamily protein;computational_description
Ro04_G36292	6192779	AT1G67660.1	Restriction endonuclease%2C type II-like superfamily protein;computational_description
Ro04_G07198	6196100	#N/A	#N/A
Ro04_G07197	6197258	AT3G26000.1	Ribonuclease inhibitor;computational_description
Ro04_G07196	6201896	AT1G67680.1	SRP72 RNA-binding domain-containing protein;computational_description
Ro04_G07195	6207509	AT1G13460.1	Protein phosphatase 2A regulatory B subunit family protein;curator_summary
Ro04_G07192	6236533	AT3G48140.1	B12D protein;computational_description
Ro04_G07191	6242670	AT1G13440.1	glyceraldehyde-3-phosphate dehydrogenase C2;symbol
Ro04_G36293	6252635	AT1G24400.1	lysine histidine transporter 2;curator_summary
Ro04_G07189	6257136	AT1G67630.1	DNA polymerase alpha 2;symbol
Ro04_G07187	6269864	AT3G25950.1	TRAM%2C LAG1 and CLN8 (TLC) lipid-sensing domain containing protein;computational_description
Ro04_G36294	6271697	AT1G24360.1	NAD(P)-binding Rossmann-fold superfamily protein;computational_description
Ro04_G07185	6275520	AT1G67620.1	Lojap-related protein;computational_description
Ro04_G07184	6285297	AT1G27850.1	RUN/FYVE domain protein;computational_description
Ro04_G07183	6291907	AT1G27880.1	DEAD/DEAH box RNA helicase family protein;computational_description
Ro04_G07182	6299624	AT1G67600.1	Acid phosphatase/vanadium-dependent haloperoxidase-related protein;computational_description
Ro04_G07181	6301349	#N/A	#N/A
Ro04_G07180	6302779	AT1G24340.1	FAD/NAD(P)-binding oxidoreductase family protein;curator_summary
Ro04_G07179	6308929	AT1G67590.1	Remorin family protein;computational_description
Ro04_G07178	6313095	AT1G67580.1	Protein kinase superfamily protein;computational_description
Ro04_G07176	6326385	AT1G67570.1	zinc finger CONSTANS-like protein (DUF3537);computational_description
Ro04_G07175	6333870	AT5G63380.1	AMP-dependent synthetase and ligase family protein;curator_summary
Ro04_G07174	6335997	AT1G67550.1	urease;curator_summary
Ro04_G07171	6355277	AT1G27900.1	RNA helicase family protein;computational_description
Ro04_G07170	6362838	AT5G14230.1	ankyrin;computational_description
Ro04_G07169	6369699	AT5G08530.1	51 kDa subunit of complex I;symbol
Ro04_G07168	6390026	AT5G43230.1	EEIG1/EHBP1 protein amino-terminal domain protein;computational_description
Ro04_G07167	6396092	AT3G57810.1	Cysteine proteinases superfamily protein;computational_description
Ro04_G36298	6404831	AT1G33720.1	cytochrome P450%2C family 76%2C subfamily C%2C polypeptide 6;curator_summary
Ro04_G36299	6425529	AT2G45550.1	cytochrome P450%2C family 76%2C subfamily C%2C polypeptide 4;curator_summary
Ro04_G07163	6433184	AT3G50940.1	P-loop containing nucleoside triphosphate hydrolases superfamily protein;computational_description
Ro04_G36300	6433232	#N/A	#N/A
Ro04_G07162	6434041	AT1G24330.1	ARM repeat superfamily protein;computational_description
Ro04_G07160	6447175	AT3G26340.1	N-terminal nucleophile aminohydrolases (Ntn hydrolases) superfamily protein;computational_description
Ro04_G07159	6449871	AT1G13060.1	20S proteasome beta subunit E1;curator_summary
Ro04_G07158	6453734	AT1G67510.1	Leucine-rich repeat protein kinase family protein;computational_description
Ro04_G07157	6458643	AT5G13010.1	RNA helicase family protein;symbol
Ro04_G07156	6467685	#N/A	#N/A
Ro04_G07155	6470669	AT1G24320.1	Six-hairpin glycosidases superfamily protein;computational_description
Ro04_G07154	6484675	AT1G24310.1	nuclear pore complex protein;computational_description
Ro04_G36281	6488810	AT1G67480.1	Galactose oxidase/kelch repeat superfamily protein;computational_description
Ro04_G07152	6491302	#N/A	#N/A
Ro04_G07150	6496181	AT1G67440.1	Minichromosome maintenance (MCM2/3/5) family protein;symbol
Ro04_G07149	6499705	AT4G40042.1	Microsomal signal peptidase 12 kDa subunit (SPC12);computational_description
Ro04_G07148	6500694	AT1G67430.1	Ribosomal protein L22p/L17e family protein;computational_description
Ro04_G07147	6503995	AT1G67420.1	Zn-dependent exopeptidases superfamily protein;computational_description
Ro04_G07146	6513532	AT1G67410.1	Exostosin family protein;computational_description
Ro04_G36280	6516689	AT3G01910.1	sulfite oxidase;curator_summary
Ro04_G36278	6522290	AT4G26220.1	S-adenosyl-L-methionine-dependent methyltransferases superfamily protein;curator_summary
Ro04_G07143	6532509	AT1G67400.1	ELMO/CED-12 family protein;computational_description
Ro04_G07142	6536920	AT1G27920.1	microtubule-associated protein 65-8;symbol
Ro04_G07141	6537443	AT5G43250.1	nuclear factor Y%2C subunit C13;symbol
Ro04_G07140	6552679	AT1G27390.1	translocase outer membrane 20-2;curator_summary
Ro04_G07139	6562081	AT1G13710.1	cytochrome P450%2C family 78%2C subfamily A%2C polypeptide 5;curator_summary
Ro04_G07138	6572991	AT5G11860.1	SCP1-like small phosphatase 5;curator_summary
Ro04_G07137	6578144	AT1G67370.1	DNA-binding HORMA family protein;curator_summary
Ro04_G07136	6596647	AT1G67360.1	Rubber elongation factor protein (REF);computational_description
Ro04_G07135	6611678	AT1G67340.1	HCP-like superfamily protein with MYND-type zinc finger;computational_description
Ro04_G07134	6635850	AT3G61470.1	photosystem I light harvesting complex protein;curator_summary
Ro04_G07133	6638549	AT5G43260.1	chaperone protein dnaJ-like protein;computational_description
Ro04_G07132	6639929	AT1G11780.1	oxidoreductase%2C 2OG-Fe(II) oxygenase family protein;computational_description
Ro04_G07131	6653790	AT1G27385.1	AT1G27385.4
Ro04_G07129	6662118	#N/A	#N/A
Ro04_G07128	6670883	AT1G27930.1	glucuronoxylan 4-O-methyltransferase-like protein (DUF579);curator_summary
Ro04_G07127	6674873	#N/A	#N/A
Ro04_G07126	6677674	AT1G67325.1	Ran BP2/NZF zinc finger-like superfamily protein;computational_description
Ro04_G07125	6682345	AT5G43270.1	squamosa promoter binding protein-like 2;curator_summary
Ro04_G07123	6692515	#N/A	#N/A
Ro04_G07122	6696502	AT1G27340.1	Galactose oxidase/kelch repeat superfamily protein;curator_summary
Ro04_G36290	6700118	AT1G33720.1	cytochrome P450%2C family 76%2C subfamily C%2C polypeptide 6;curator_summary
Ro04_G07120	6708782	AT5G53150.1	DnaJ heat shock amino-terminal domain protein;computational_description
Ro04_G07119	6711840	#N/A	#N/A
Ro04_G07118	6724611	AT1G27320.1	histidine kinase 3;curator_summary
Ro04_G07117	6732007	AT1G27970.1	nuclear transport factor 2B;curator_summary
Ro04_G07116	6735141	AT1G67310.1	Calmodulin-binding transcription activator protein with CG-1 and Ankyrin domain;computational_description
Ro04_G07115	6749463	AT5G08391.1	transmembrane protein%2C putative (DUF 3339);computational_description
Ro04_G07114	6751391	AT3G48660.1	transmembrane protein%2C putative (DUF 3339);computational_description
Ro04_G07113	6752361	AT1G27290.1	transmembrane protein;computational_description
Ro04_G07112	6757201	AT1G24260.1	K-box region and MADS-box transcription factor family protein;curator_summary
Ro04_G07111	6772829	AT5G50570.1	Squamosa promoter-binding protein-like (SBP domain) transcription factor family protein;symbol
Ro04_G07109	6784994	AT1G67320.1	DNA primase%2C large subunit family;symbol
Ro04_G07107	6790743	AT1G24267.1	bZIP transcription factor%2C putative (DUF1664);computational_description
Ro04_G07106	6800969	AT5G13080.1	WRKY DNA-binding protein 75;curator_summary
Ro04_G07105	6813847	AT1G27980.1	dihydrosphingosine phosphate lyase;symbol
Ro04_G07104	6819410	#N/A	#N/A
Ro04_G07103	6825284	AT4G15900.1	pleiotropic regulatory locus 1;curator_summary
Ro04_G07102	6827732	AT5G13090.1	hypothetical protein;computational_description
Ro04_G07101	6830976	AT1G27990.1	transmembrane protein;computational_description
Ro04_G07099	6836615	AT5G13100.1	Gap junction beta-4 protein;computational_description
Ro04_G07098	6841527	AT3G52660.1	RNA-binding (RRM/RBD/RNP motifs) family protein;computational_description
Ro04_G07097	6845866	AT5G13110.1	glucose-6-phosphate dehydrogenase 2;curator_summary
Ro04_G36305	6862512	AT5G40100.1	Disease resistance protein (TIR-NBS-LRR class) family;computational_description
Ro04_G23138	6886290	AT1G76990.1	ACT domain repeat 3;symbol
Ro04_G23136	6892249	AT5G13120.1	cyclophilin 20-2;curator_summary
Ro04_G23135	6895655	AT2G35450.1	catalytic/ hydrolase;computational_description
Ro04_G23134	6898832	AT1G27430.1	GYF domain-containing protein;computational_description
Ro04_G23133	6907085	#N/A	#N/A
Ro04_G23132	6908806	#N/A	#N/A
Ro04_G23130	6916123	#N/A	#N/A
Ro04_G23129	6925328	AT4G24970.1	Histidine kinase-%2C DNA gyrase B-%2C and HSP90-like ATPase family protein;computational_description
Ro04_G23128	6932561	AT5G13140.1	Pollen Ole e 1 allergen and extensin family protein;computational_description
Ro04_G23127	6935863	AT5G14070.1	Thioredoxin superfamily protein;curator_summary
Ro04_G36307	6946851	AT5G13160.1	Protein kinase superfamily protein;curator_summary
Ro04_G23123	6953017	AT3G48740.1	Nodulin MtN3 family protein;curator_summary
Ro04_G23122	6959193	AT5G43280.1	delta(3%2C5)%2Cdelta(2%2C4)-dienoyl-CoA isomerase 1;curator_summary
Ro04_G36308	6960784	AT5G41080.1	PLC-like phosphodiesterases superfamily protein;curator_summary
Ro04_G23119	6971914	AT5G13180.1	NAC domain containing protein 83;curator_summary
Ro04_G23118	6975692	AT1G27435.1	hypothetical protein;computational_description
Ro04_G23117	6984178	AT5G50850.1	Transketolase family protein;symbol
Ro04_G23116	6990242	AT2G33490.1	hydroxyproline-rich glycoprotein family protein;computational_description
Ro04_G23115	6995845	AT4G33430.1	BRI1-associated receptor kinase;curator_summary
Ro04_G23114	7007710	AT2G33500.1	B-box type zinc finger protein with CCT domain-containing protein;symbol
Ro04_G23113	7014607	AT5G13190.1	GSH-induced LITAF domain protein;curator_summary
Ro04_G23112	7019881	AT2G33510.1	ATP-dependent RNA helicase;computational_description
Ro04_G23111	7027706	AT5G07740.1	actin binding protein;computational_description
Ro04_G23109	7028625	AT5G13200.1	GRAM domain family protein;curator_summary
Ro04_G23110	7030255	#N/A	#N/A
Ro04_G23107	7035142	AT3G24780.1	Uncharacterized conserved protein UCP015417%2C vWA;computational_description
Ro04_G08827	7057971	AT5G13220.1	jasmonate-zim-domain protein 10;curator_summary
Ro04_G08828	7061123	AT3G61110.1	ribosomal protein S27;curator_summary
Ro04_G08829	7062986	AT5G13230.1	Tetratricopeptide repeat (TPR)-like superfamily protein;computational_description
Ro04_G08832	7082521	AT1G28080.1	RING finger protein;computational_description
Ro04_G08834	7115459	AT3G48800.1	Sterile alpha motif (SAM) domain-containing protein;computational_description
Ro04_G08840	7182020	AT4G34530.1	cryptochrome-interacting basic-helix-loop-helix 1;curator_summary
Ro04_G08841	7187934	AT2G33540.1	C-terminal domain phosphatase-like 3;symbol
Ro04_G08843	7198342	AT5G13260.1	myosin;computational_description
Ro04_G36325	7210486	AT1G28110.1	serine carboxypeptidase-like 45;symbol
Ro04_G08845	7213487	AT1G28100.1	hypothetical protein;computational_description
Ro04_G08847	7217043	AT5G13270.1	AT5G13270.1
Ro04_G08846	7219586	AT5G13280.1	aspartate kinase 1;curator_summary
Ro04_G08848	7225388	AT3G26740.1	CCR-like protein;curator_summary
Ro04_G08849	7227967	AT5G13300.1	ARF GTPase-activating protein;curator_summary
Ro04_G36324	7252713	AT5G48100.1	Laccase/Diphenol oxidase family protein;curator_summary
Ro04_G08853	7258781	AT5G13310.1	hypothetical protein;computational_description
Ro04_G08854	7260886	AT2G33550.1	Homeodomain-like superfamily protein;computational_description
Ro04_G08855	7268487	AT5G13960.1	histone-lysine N-methyltransferase%2C H3 lysine-9 specific SUVH4-like protein;curator_summary
Ro04_G08856	7282188	AT1G29400.1	MEI2-like protein 5;curator_summary
Ro04_G08857	7292677	AT1G28120.1	ubiquitin thioesterase otubain-like protein;computational_description
Ro04_G08858	7295523	AT5G61910.1	DCD (Development and Cell Death) domain protein;computational_description
Ro04_G08859	7305050	AT5G13330.1	related to AP2 6l;curator_summary
Ro04_G08860	7310834	AT1G28140.1	integral membrane family protein;computational_description
Ro04_G08861	7312424	AT1G57820.1	Zinc finger (C3HC4-type RING finger) family protein;curator_summary
Ro04_G08862	7320572	AT1G29880.1	glycyl-tRNA synthetase / glycine-tRNA ligase;computational_description
Ro04_G36312	7325601	AT5G13430.1	Ubiquinol-cytochrome C reductase iron-sulfur subunit;computational_description
Ro04_G08863	7328056	AT1G01630.1	Sec14p-like phosphatidylinositol transfer family protein;computational_description
Ro04_G08864	7333678	AT1G27440.1	Exostosin family protein;symbol
Ro04_G08865	7338826	AT5G13420.1	Aldolase-type TIM barrel family protein;symbol
Ro04_G08866	7345004	AT1G11680.1	CYTOCHROME P450 51G1;curator_summary
Ro04_G08867	7354009	AT5G13400.1	Major facilitator superfamily protein;computational_description
Ro04_G08868	7355632	AT3G02290.1	RING/U-box superfamily protein;computational_description
Ro04_G08869	7361401	AT4G14100.1	transferases%2C transferring glycosyl groups;computational_description
Ro04_G08870	7363374	AT1G29880.1	glycyl-tRNA synthetase / glycine-tRNA ligase;computational_description
Ro04_G08872	7380566	AT1G28130.1	Auxin-responsive GH3 family protein;curator_summary
Ro04_G36328	7395733	AT3G61110.1	ribosomal protein S27;curator_summary
Ro04_G36327	7398982	AT1G12880.1	nudix hydrolase homolog 12;symbol
Ro04_G08878	7411020	#N/A	#N/A
Ro04_G36326	7412232	#N/A	#N/A
Ro04_G08881	7420885	AT4G13420.1	high affinity K+ transporter 5;curator_summary
Ro04_G08882	7432664	#N/A	#N/A
Ro04_G08883	7434385	AT4G24630.1	DHHC-type zinc finger family protein;computational_description
Ro04_G08884	7439980	#N/A	#N/A
[truncated: 345 more rows]
